# Supplementary material for: P/N-heteroleptic Cu(i)-photosensitizer-catalyzed domino radical relay annulation of 1,6-enynes with aryldiazonium salts
Source: Royal Society of Chemistry journal article supplement (doi:10.1039/d3ob01177a), 2023-01-01

## Electronic Supplementary Information

### P/N-Heteroleptic Cu(I)-photosensitizer-catalyzed domino radical relay annulation of 1,6-enynes with aryldiazonium salts

Qian Liu,<sup>a</sup> Qibo Ni,<sup>a</sup> Yan Zhou,<sup>a</sup> Lang Chen,<sup>a</sup> Siwei Xiang,<sup>a</sup> Limeng Zheng<sup>a</sup> and Yunkui Liu\*<sup>a,b</sup>

<sup>a</sup>State Key Laboratory Breeding Base of Green Chemistry-Synthesis Technology, College of Chemical Engineering, Zhejiang University of Technology, Hangzhou, 310014, P. R. China.

<sup>b</sup>Key Laboratory of Organosilicon Chemistry and Material Technology of Ministry of Education, Hangzhou Normal University, Hangzhou 311121, P. R. China.

E-mail: ykuiliu@zjut.edu.cn.

### Contents

|    |                                                                                                                       |     |
|----|-----------------------------------------------------------------------------------------------------------------------|-----|
| 1. | General Information                                                                                                   | S2  |
| 2. | General procedure for the preparation of the starting material <b>1</b>                                               | S2  |
| 3. | Preparation of the starting material aryldiazonium tetrafluoroborates <b>2</b> and safety notice of handling <b>2</b> | S3  |
| 4. | Preparation of the photosensitizers ( <i>PS 1-PS 5</i> )                                                              | S3  |
| 5. | General procedure for the synthesis of products <b>3</b> and characterization                                         | S3  |
| 6. | Scale-up experiment                                                                                                   | S10 |
| 7. | Mechanistic experiments                                                                                               | S12 |
| 8. | References                                                                                                            | S15 |
| 9. | NMR Spectra of products                                                                                               | S16 |

## 1. General information

All glassware was thoroughly oven-dried. Solvents were dried according to standard methods prior to use. All commercially available reagents were obtained from chemical suppliers and used after proper purification if necessary. Thin-layer chromatography (TLC) plates were visualized by exposure to ultraviolet light. Flash chromatography was carried out using silica gel (100-200 mesh). Melting points are uncorrected. NMR spectra were recorded with tetramethylsilane as the internal standard.  $^1\text{H}$  NMR and  $^{13}\text{C}$  NMR spectra of  $\text{CDCl}_3$  solutions were recorded at 500 and 125 MHz (Bruker Avance), respectively and resonances ( $\delta$ ) are given in parts per million relatives to tetramethylsilane. Data for  $^1\text{H}$  NMR are reported as follows: chemical shift ( $\delta$  ppm), mul-tiplicity (s = singlet, d = doublet, t = triplet, q = quartet, m = multiplet, dd = doublet), integration, coupling constant (Hz) and assignment. Data for  $^{13}\text{C}$  NMR are reported as chemical shift. GC-MS experiments were performed with an Agilent 6890N GC system equipped with a 5973N mass-selective detector with EI source; High resolution mass spectra (HRMS) were obtained on a TOF MS instrument with EI or ESI source.

## 2. General procedure for the preparation of the starting material **1**<sup>1,2</sup>

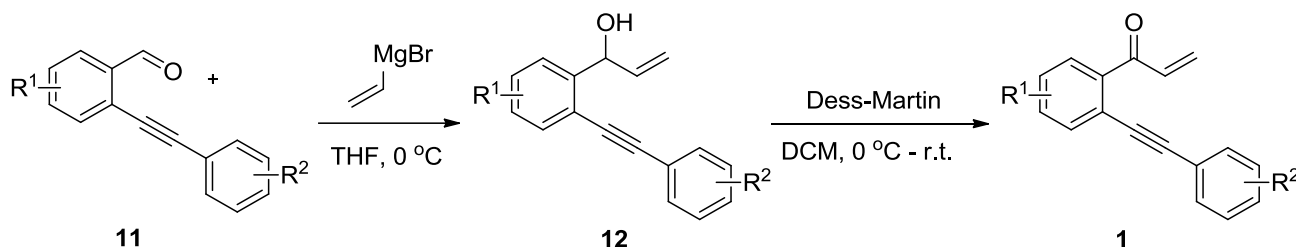

General procedure: Vinyl magnesium bromide (1.2 mmol, 1.2 equiv.) was added dropwise to a solution of *ortho*-phenylethynylbenzaldehyde **11**<sup>1</sup> (1.0 mmol, 1 equiv.) in anhydrous THF (0.35 M) at  $0\text{ }^\circ\text{C}$  for 30 min and then stirred at rt for 6 h. The reaction was quenched with aq.  $\text{NH}_4\text{Cl}$  and the organic layers was separated. The aqueous layer was extracted with EtOAc ( $3 \times 20\text{ mL}$ ). The combined organic layers were washed with brine ( $3 \times 10\text{ mL}$ ), dried over  $\text{MgSO}_4$ , and concentrated under reduced pressure to give crude **12**.<sup>2</sup> Crude **12** was used for the next step without further purification.

To a solution of compound **12** (1.0 mmol, 1 equiv.) in DCM was added Dess-Martin

reagent (1.2 mmol, 1.2 equiv.) at 0 °C while stirring. The resulting mixture was then stirred at rt. Upon complete consumption of the starting material as monitored by TLC, the reaction mixture was quenched with saturated aqueous Na<sub>2</sub>S<sub>2</sub>O<sub>3</sub> and extracted with ethyl acetate (3 × 10 mL). The combined organic layers were washed with brine, and dried over anhydrous Na<sub>2</sub>SO<sub>4</sub>. The solvent was evaporated under vacuum and the crude product were purified by column chromatography on silica gel (100-200 mesh), eluting with the indicated mixture of EA/PE (1:10 (v/v)) to give compound **1**.

### **3. Preparation of the starting material aryldiazonium tetrafluoroborates **2** and safety notice of handling **2****

All aryldiazonium tetrafluoroborates (**2**) were synthesized from the corresponding anilines according to the literature procedure and their analytical data are consistent with the reported ones.<sup>3</sup>

**Safety notice of handling 2.** Some aryldiazonium tetrafluoroborates could be explosive and should be handled carefully. Face shields, leather gloves, and protective leather clothing are highly recommended when handling these compounds.

### **4. Preparation of the photosensitizers (*PS 1-PS 5*)**

The photosensitizers *PS 1-PS5* were synthesized according to the literature procedure and their analytical data are consistent with the reported ones.<sup>4</sup>

### **5. General procedure for the synthesis of products **3** and characterization**

Typical procedure: 4-methylphenyldiazonium tetrafluoroborate **2a** (1.2 mmol, 247.1 mg, 3 equiv. based on **1a**), *PS 1* (23.0 mg, 5 mol % based on **1a**) and CuSO<sub>4</sub> • 5H<sub>2</sub>O (10.0 mg, 10 mol % based on **1a**) were placed in a 25 mL Schlenk tube. The tube was evacuated and refilled with N<sub>2</sub> three times. 1-(2-(phenylethynyl)phenyl)prop-2-en-1-one **1a** (92.9 mg, 0.4 mmol) and EtOH (4 mL) were added, and the resulting mixture was irradiated with a blue LED lamp (15 W) at 40 °C under N<sub>2</sub> atmosphere for 4 h. Upon completion, the reaction mixture was evaporated and purified by column chromatography on silica gel (100-200 mesh), eluting with the indicated mixture of EA/PE (1:20 (v/v)) to give the pure product **3aa**.

#### **Characterization of the products**

### 7-methyl-5-phenyl-11H-benzo[*b*]fluoren-11-one (3aa)

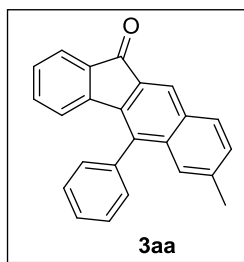

Yellow solid (66.5 mg, 52%). m.p. 159–161 °C. <sup>1</sup>H NMR (500 MHz, CDCl<sub>3</sub>): δ 8.18 (s, 1H), 7.83 (d, *J* = 8.2 Hz, 1H), 7.75–7.70 (m, 1H), 7.66–7.59 (m, 3H), 7.44–7.38 (m, 2H), 7.33–7.28 (m, 1H), 7.24–7.15 (m, 3H), 6.29 (d, *J* = 7.3 Hz, 1H), 2.39 (s, 3H). <sup>13</sup>C NMR (125 MHz, CDCl<sub>3</sub>): δ 193.2, 145.1, 139.3, 137.6, 137.1, 136.6, 135.48, 134.53, 134.1, 131.8, 131.5, 130.6, 129.7, 129.2, 128.9, 128.5, 128.2, 126.4, 125.1, 124.1, 123.7, 22.0. HRMS (ESI) *m/z*: [M+H]<sup>+</sup> Calcd for C<sub>24</sub>H<sub>17</sub>O 321.1279; Found 321.1277.

### 7-methyl-5-(*o*-tolyl)-11H-benzo[*b*]fluoren-11-one (3ba)

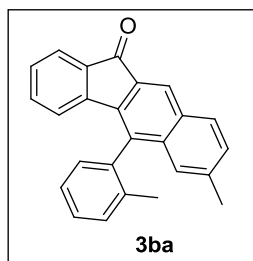

Yellow solid (70.9 mg, 53%). m.p. 146–147 °C. <sup>1</sup>H NMR (500 MHz, CDCl<sub>3</sub>): δ 8.22 (s, 1H), 7.86 (d, *J* = 8.2 Hz, 1H), 7.76–7.72 (m, 1H), 7.55–7.46 (m, 2H), 7.46–7.40 (m, 1H), 7.33 (dd, *J*<sub>1</sub> = 8.2 Hz, *J*<sub>2</sub> = 1.4 Hz, 1H), 7.27–7.17 (m, 3H), 7.13 (d, *J* = 0.6 Hz, 1H), 6.21 (d, *J* = 7.1 Hz, 1H), 2.40 (s, 3H), 2.03 (s, 3H). <sup>13</sup>C NMR (125 MHz, CDCl<sub>3</sub>): δ 193.3, 145.2, 139.5, 137.0, 136.8, 136.7, 136.54, 135.51, 134.9, 133.4, 131.9, 131.7, 130.8, 130.6, 129.8, 129.0, 128.6, 128.6, 126.8, 125.9, 125.0, 124.1, 123.2, 22.1, 19.6. HRMS (ESI) *m/z*: [M+Na]<sup>+</sup> Calcd for C<sub>25</sub>H<sub>18</sub>ONa 357.1255; Found 357.1263.

### 7-methyl-5-(*m*-tolyl)-11H-benzo[*b*]fluoren-11-one (3ca)

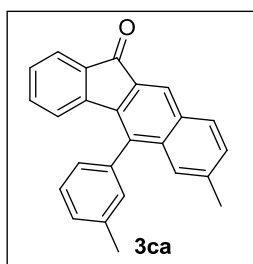

Yellow solid (64.2 mg, 48%). m.p. 142–144 °C. <sup>1</sup>H NMR (500 MHz, CDCl<sub>3</sub>): δ 8.19 (s, 1H), 7.84 (d, *J* = 8.2 Hz, 1H), 7.76–7.71 (m, 1H), 7.52 (t, *J* = 7.5 Hz, 1H), 7.42 (d, *J* = 7.7 Hz, 1H), 7.31 (dd, *J*<sub>1</sub> = 8.2 Hz, *J*<sub>2</sub> = 1.4 Hz, 1H), 7.26–7.18 (m, 5H), 6.33 (dd, *J*<sub>1</sub> = 6.4 Hz, *J*<sub>2</sub> = 1.4 Hz, 1H), 2.49 (s, 3H), 2.41 (s, 3H). <sup>13</sup>C NMR (125 MHz, CDCl<sub>3</sub>): δ 193.3, 145.2, 139.3, 138.9, 137.5, 137.1, 136.6, 135.4, 134.6, 134.3, 131.8, 131.5, 130.6, 130.3, 129.1, 128.9, 128.9, 128.4, 126.7, 126.5, 125.0, 124.0, 123.8, 22.1, 21.6. HRMS (ESI) *m/z*: [M+H]<sup>+</sup> Calcd for C<sub>25</sub>H<sub>19</sub>O 335.1436; Found 335.1439.

### 7-methyl-5-(*p*-tolyl)-11H-benzo[*b*]fluoren-11-one (3da)

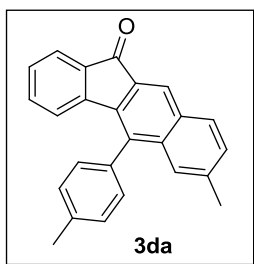

Yellow solid (68.2 mg, 51%). m.p. 179–180 °C.  $^1\text{H}$  NMR (500 MHz,  $\text{CDCl}_3$ ):  $\delta$  8.19 (s, 1H), 7.84 (d,  $J = 8.2$  Hz, 1H), 7.76–7.70 (m, 1H), 7.43 (d,  $J = 7.7$  Hz, 2H), 7.33–7.28 (m, 3H), 7.24 (s, 1H), 7.23–7.18 (m, 2H), 6.38 (d,  $J = 6.5$  Hz, 1H), 2.57 (s, 3H), 2.40 (s, 3H).  $^{13}\text{C}$  NMR (125 MHz,  $\text{CDCl}_3$ ):  $\delta$  193.4, 145.3, 139.3, 137.9, 137.3, 136.6, 135.6,

134.6, 134.4, 134.3, 131.8, 131.6, 130.6, 130.0, 129.6, 128.9, 128.5, 126.5, 125.0, 124.1, 123.8, 22.1, 21.5. HRMS (ESI)  $m/z$ :  $[\text{M}+\text{H}]^+$  Calcd for  $\text{C}_{25}\text{H}_{19}\text{O}$  335.1436; Found 335.1440.

#### 5-(4-(*tert*-butyl)phenyl)-7-methyl-11H-benzo[*b*]fluoren-11-one (3ea)

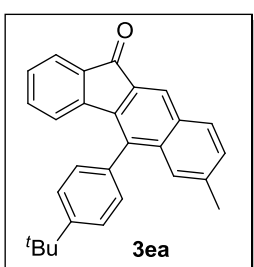

Yellow solid (64.8 mg, 43%). m.p. 224–226 °C.  $^1\text{H}$  NMR (500 MHz,  $\text{CDCl}_3$ ):  $\delta$  8.20 (s, 1H), 7.85 (d,  $J = 8.2$  Hz, 1H), 7.74–7.71 (m, 1H), 7.65–7.61 (m, 2H), 7.35–7.30 (m, 3H), 7.27 (d,  $J = 0.6$  Hz, 1H), 7.24–7.15 (m, 2H), 6.26 (d,  $J = 7.5$  Hz, 1H), 2.41 (s, 3H), 1.50 (s, 9H).  $^{13}\text{C}$  NMR (125 MHz,  $\text{CDCl}_3$ ):  $\delta$  193.4, 151.3, 145.3, 139.3, 137.3, 136.6,

135.7, 134.6, 134.4, 131.8, 131.5, 130.6, 129.3, 128.9, 128.4, 126.5, 126.1, 125.0, 124.1, 123.8, 34.9, 31.5, 22.1. HRMS (ESI)  $m/z$ :  $[\text{M}+\text{H}]^+$  Calcd for  $\text{C}_{28}\text{H}_{25}\text{O}$  377.1905; Found 377.1903.

#### 5-(4-methoxyphenyl)-7-methyl-11H-benzo[*b*]fluoren-11-one (3fa)

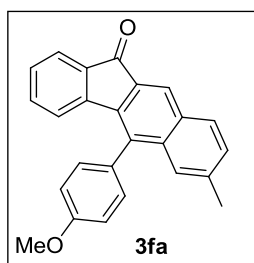

Yellow solid (42.3 mg, 37%). m.p. 174–176 °C.  $^1\text{H}$  NMR (500 MHz,  $\text{CDCl}_3$ ):  $\delta$  8.16 (s, 1H), 7.81 (d,  $J = 8.2$  Hz, 1H), 7.75–7.69 (m, 1H), 7.32–7.28 (m, 3H), 7.25 (s, 1H), 7.23–7.20 (m, 2H), 7.17–7.13 (m, 2H), 6.43–6.39 (m, 1H), 3.98 (s, 3H), 2.40 (s, 3H).  $^{13}\text{C}$  NMR (125 MHz,  $\text{CDCl}_3$ ):  $\delta$  193.3, 159.5, 145.3, 139.3, 137.5, 136.6, 135.8, 134.5, 133.9,

131.8, 131.5, 130.9, 130.6, 129.5, 128.8, 128.4, 126.4, 124.9, 124.0, 123.8, 114.6, 55.4, 22.1. HRMS (ESI)  $m/z$ :  $[\text{M}+\text{H}]^+$  Calcd for  $\text{C}_{25}\text{H}_{19}\text{O}_2$  351.1385; Found 351.1391.

#### 5-(2-bromophenyl)-7-methyl-11H-benzo[*b*]fluoren-11-one (3ga)

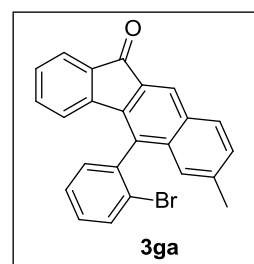

Yellow solid (103.7 mg, 65%). m.p. 232–234 °C.  $^1\text{H}$  NMR (500 MHz,  $\text{CDCl}_3$ ):  $\delta$  8.25 (s, 1H), 7.91–7.86 (m, 2H), 7.77–7.74 (m, 1H), 7.58 (m, 1H), 7.50 (m, 1H), 7.40 (dd,  $J_1 = 7.5$ ,  $J_2 = 1.7$  Hz, 1H), 7.34 (dd,  $J_1 = 8.2$  Hz,  $J_2 = 1.4$  Hz, 1H), 7.2757.21 (m, 2H), 7.09 (d,  $J_1 = 0.6$  Hz, 1H), 6.27 (dd,  $J_1 = 6.6$  Hz,  $J_2 = 1.0$  Hz, 1H), 2.42 (s, 3H).  $^{13}\text{C}$  NMR (125 MHz,  $\text{CDCl}_3$ ):  $\delta$  193.0, 144.7, 139.7, 138.4, 136.6, 136.2, 135.9, 134.9, 133.5, 132.6,

(125 MHz,  $\text{CDCl}_3$ ):  $\delta$  193.0, 144.7, 139.7, 138.4, 136.6, 136.2, 135.9, 134.9, 133.5, 132.6,

131.8, 131.61, 131.60, 130.8, 130.1, 129.1, 128.8, 128.3, 125.7, 125.54, 124.45, 124.2, 123.1, 22.1. HRMS (ESI)  $m/z$ :  $[M+H]^+$  Calcd for  $C_{24}H_{16}OBr$  399.0385; Found 399.0377.

### 5-(2-chlorophenyl)-7-methyl-11H-benzo[b]fluoren-11-one (3ha)

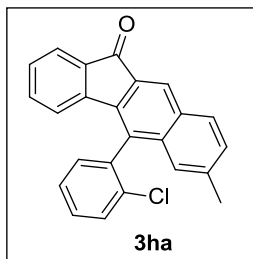

Yellow solid (76.6 mg, 54%). m.p. 224–226 °C.  $^1H$  NMR (500 MHz,  $CDCl_3$ ):  $\delta$  8.25 (s, 1H), 7.87 (d,  $J = 8.2$  Hz, 1H), 7.76 (d,  $J = 7.1$  Hz, 1H), 7.71 (d,  $J = 8.0$  Hz, 1H), 7.61–7.56 (m, 1H), 7.55–7.50 (m, 1H), 7.41 (d,  $J = 7.4$  Hz, 1H), 7.34 (d,  $J = 8.2$  Hz, 1H), 7.28–7.21 (m, 2H), 7.10 (s, 1H), 6.28 (d,  $J = 7.0$  Hz, 1H), 2.42 (s, 3H).  $^{13}C$  NMR (125 MHz,

$CDCl_3$ ):  $\delta$  193.0, 144.7, 139.7, 136.6, 136.31, 136.29, 136.1, 134.9, 134.4, 131.8, 131.7, 131.6, 130.8, 130.3, 130.0, 129.1, 128.8, 127.7, 125.7, 125.6, 124.2, 123.0, 22.1. HRMS (ESI)  $m/z$ :  $[M+H]^+$  Calcd for  $C_{24}H_{16}OCl$  355.0890; Found 355.0890.

### 2-(7-methyl-11-oxo-11H-benzo[b]fluoren-5-yl)benzotrile (3ia)

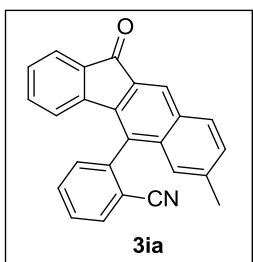

Yellow solid (77.4 mg, 56%). m.p. 273–274 °C.  $^1H$  NMR (500 MHz,  $CDCl_3$ ):  $\delta$  8.28 (s, 1H), 8.00 (dd,  $J_1 = 7.8$  Hz,  $J_2 = 0.8$  Hz, 1H), 7.91–7.85 (m, 2H), 7.81–7.71 (m, 2H), 7.58 (dd,  $J_1 = 7.7$  Hz,  $J_2 = 0.6$  Hz, 1H), 7.36 (dd,  $J_1 = 8.2$  Hz,  $J_2 = 1.3$  Hz, 1H), 7.31–7.24 (m, 1H), 7.24–7.17 (m, 1H), 7.00 (d,  $J = 0.7$  Hz, 1H), 6.12 (d,  $J = 7.6$  Hz, 1H), 2.41

(s, 3H).  $^{13}C$  NMR (125 MHz,  $CDCl_3$ ):  $\delta$  192.6, 144.2, 141.8, 140.1, 136.7, 136.5, 136.2, 134.7, 133.8, 133.6, 131.7, 131.7, 131.3, 131.0, 129.4, 129.3, 129.2, 129.1, 126.3, 125.3, 124.5, 122.8, 117.1, 114.1, 22.1. HRMS (ESI)  $m/z$ :  $[M+Na]^+$  Calcd for  $C_{25}H_{15}NO$  368.1051; Found 368.1050.

### 5-(4-bromophenyl)-7-methyl-11H-benzo[b]fluoren-11-one (3ka)

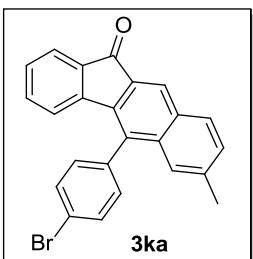

Yellow solid (100.6 mg, 63%). m.p. 229–230 °C.  $^1H$  NMR (500 MHz,  $CDCl_3$ ):  $\delta$  8.19 (s, 1H), 7.87–7.70 (m, 4H), 7.34–7.29 (m, 3H), 7.27–7.23 (m, 2H), 7.15 (s, 1H), 6.42–6.36 (m, 1H), 2.41 (s, 3H).  $^{13}C$  NMR (125 MHz,  $CDCl_3$ ):  $\delta$  193.0, 144.8, 139.6, 136.8, 136.6, 135.6, 134.7, 132.6, 131.8, 131.63, 131.5, 130.7, 129.1, 128.8, 126.1, 125.4, 124.3,

123.6, 122.5, 22.1. HRMS (ESI)  $m/z$ :  $[M+H]^+$  Calcd for  $C_{24}H_{15}ONaBr$  421.0206; Found 421.0204.

### 5-(4-fluorophenyl)-7-methyl-11H-benzo[b]fluoren-11-one (3la)

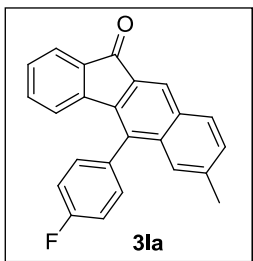

Yellow solid (81.2 mg, 60%). m.p. 209–211 °C.  $^1\text{H}$  NMR (500 MHz,  $\text{CDCl}_3$ ):  $\delta$  8.18 (s, 1H), 7.83 (d,  $J = 8.2$  Hz, 1H), 7.75–7.71 (m, 1H), 7.41–7.30 (m, 5H), 7.26–7.20 (m, 2H), 7.17 (s, 1H), 6.33 (dd,  $J_1 = 6.1$  Hz,  $J_2 = 2.3$  Hz, 1H), 2.41 (s, 3H).  $^{13}\text{C}$  NMR ( $\text{CDCl}_3$ , 125 MHz):  $\delta$  193.0, 162.8 (d,  $J = 247.5$  Hz), 144.9, 139.5, 137.1, 136.6, 135.8, 134.6, 133.4 (d,  $J = 3.5$  Hz), 132.9, 131.7, 131.5 (d,  $J = 7.7$  Hz), 131.5, 130.7, 129.0, 128.7, 126.2, 125.3, 124.2, 123.6, 116.4 (d,  $J = 21.3$  Hz), 22.1. HRMS (ESI)  $m/z$ :  $[\text{M}+\text{H}]^+$  Calcd for  $\text{C}_{24}\text{H}_{16}\text{OF}$  339.1185; Found 339.1180.

#### 7-methyl-5-(4-(trifluoromethyl)phenyl)-11H-benzo[b]fluoren-11-one (3ma)

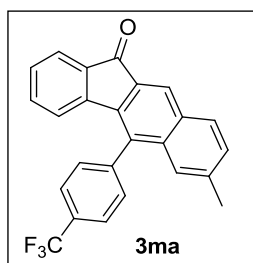

Yellow solid (105.6 mg, 68%). m.p. 209–211 °C.  $^1\text{H}$  NMR (500 MHz,  $\text{CDCl}_3$ ):  $\delta$  8.17 (d,  $J = 3.5$  Hz, 1H), 7.91 (d,  $J = 8.0$  Hz, 2H), 7.82 (dd,  $J_1 = 8.2$  Hz,  $J_2 = 2.6$  Hz, 1H), 7.74–7.69 (m, 1H), 7.57 (d,  $J = 7.8$  Hz, 2H), 7.32 (d,  $J = 8.2$  Hz, 1H), 7.26–7.19 (m, 2H), 7.09 (s, 1H), 6.28–6.23 (m, 1H), 2.41 (s, 3H).  $^{13}\text{C}$  NMR (125 MHz,  $\text{CDCl}_3$ ):  $\delta$  192.7, 144.5, 141.7, 139.8, 136.6, 136.5, 135.5, 134.7, 132.2, 131.7, 131.5, 130.8, 130.6 (q,  $J = 32.5$  Hz), 130.4, 129.1, 128.9, 126.3 (q,  $J = 3.7$  Hz), 125.9, 125.5, 124.3, 124.2 (q,  $J = 272.3$  Hz), 123.4, 22.0. HRMS (ESI)  $m/z$ :  $[\text{M}+\text{H}]^+$  Calcd for  $\text{C}_{25}\text{H}_{16}\text{OF}_3$  389.1159; Found 389.1153.

#### 7-methyl-5-(naphthalen-1-yl)-11H-benzo[b]fluoren-11-one (3na)

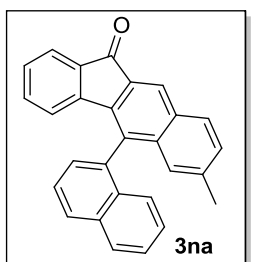

Yellow solid (69.6 mg, 47%). m.p. 215–217 °C.  $^1\text{H}$  NMR (500 MHz,  $\text{CDCl}_3$ ):  $\delta$  8.31 (s, 1H), 8.13 (d,  $J = 8.3$  Hz, 1H), 8.05 (d,  $J = 8.3$  Hz, 1H), 7.91 (d,  $J = 8.2$  Hz, 1H), 7.75–7.69 (m, 2H), 7.57–7.50 (m, 2H), 7.43 (d,  $J = 8.4$  Hz, 1H), 7.35–7.29 (m, 2H), 7.17–7.12 (m, 1H), 7.03 (s, 1H), 7.01–6.95 (m, 1H), 5.84 (d,  $J = 7.7$  Hz, 1H), 2.28 (s, 3H).  $^{13}\text{C}$  NMR (125 MHz,  $\text{CDCl}_3$ ):  $\delta$  193.3, 144.8, 139.6, 137.6, 136.7, 136.6, 135.1, 134.7, 133.9, 132.3, 131.6, 130.7, 129.1, 128.7, 128.5, 128.4, 127.7, 126.7, 126.48, 126.46, 126.1, 125.7, 125.4, 124.0, 123.6, 22.0. HRMS (ESI)  $m/z$ :  $[\text{M}+\text{H}]^+$  Calcd for  $\text{C}_{28}\text{H}_{19}\text{O}$  371.1436; Found 371.1430.

#### 7-methyl-5-(thiophen-3-yl)-11H-benzo[b]fluoren-11-one (3oa)

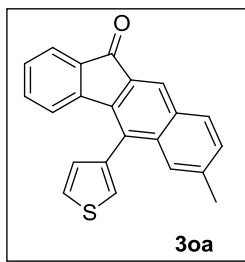

Yellow solid (57.4 mg, 44%). m.p. 201–202 °C. <sup>1</sup>H NMR (500 MHz, CDCl<sub>3</sub>): δ 8.19 (s, 1H), 7.84 (d, *J* = 8.2 Hz, 1H), 7.76–7.71 (m, 1H), 7.69–7.64 (m, 1H), 7.38–7.35 (m, 1H), 7.34–7.29 (m, 2H), 7.29–7.23 (m, 2H), 7.16 (dd, *J*<sub>1</sub> = 4.8 Hz, *J*<sub>2</sub> = 1.2 Hz, 1H), 6.47–6.41 (m, 1H), 2.43 (s, 3H). <sup>13</sup>C NMR (125 MHz, CDCl<sub>3</sub>): δ 193.2, 145.0, 139.5, 137.5, 137.2, 136.51, 136.46, 134.7, 131.8, 131.4, 130.6, 129.1, 128.99, 128.95, 128.7, 126.9, 126.2, 125.3, 124.2, 124.1, 123.5, 22.1. HRMS (ESI) *m/z*: [M+Na]<sup>+</sup> Calcd for C<sub>22</sub>H<sub>14</sub>ONaS 349.0663; Found 349.0660.

#### 4,7-dimethyl-5-phenyl-11H-benzo[*b*]fluoren-11-one (3pa)

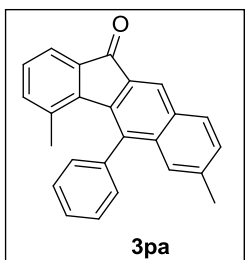

Yellow solid (82.8 mg, 62%). m.p. 218–219 °C. <sup>1</sup>H NMR (500 MHz, CDCl<sub>3</sub>): δ 8.25 (s, 1H), 7.82 (d, *J* = 8.2 Hz, 1H), 7.67 (dd, *J*<sub>1</sub> = 7.2 Hz, *J*<sub>2</sub> = 0.6 Hz, 1H), 7.56–7.50 (m, 3H), 7.48–7.43 (m, 2H), 7.36 (d, *J* = 0.7 Hz, 1H), 7.31 (dd, *J*<sub>1</sub> = 8.2 Hz, *J*<sub>2</sub> = 1.3 Hz, 1H), 7.19 (t, *J* = 7.4 Hz, 1H), 7.11 (dd, *J*<sub>1</sub> = 7.5, *J*<sub>2</sub> = 0.5 Hz, 1H), 2.39 (s, 3H), 1.38 (s, 3H). <sup>13</sup>C NMR (125 MHz, CDCl<sub>3</sub>): δ 193.2, 144.6, 140.1, 139.2, 139.0, 138.2, 137.9, 137.4, 135.6, 134.7, 133.1, 131.8, 131.1, 130.4, 128.9, 128.64, 128.4, 128.0, 127.1, 125.2, 121.9, 22.3, 21.3. HRMS (ESI) *m/z*: [M+H]<sup>+</sup> Calcd for C<sub>25</sub>H<sub>19</sub>O 335.1436; Found 335.1431.

#### 3-methoxy-7-methyl-5-phenyl-11H-benzo[*b*]fluoren-11-one (3qa)

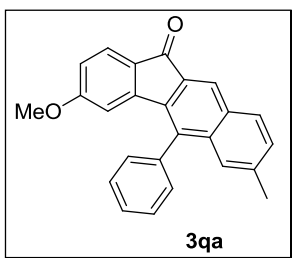

Yellow solid (72.8 mg, 52%). m.p. 169–170 °C. <sup>1</sup>H NMR (500 MHz, CDCl<sub>3</sub>): δ 8.15 (s, 1H), 7.84 (d, *J* = 8.2 Hz, 1H), 7.68–7.57 (m, 4H), 7.46–7.41 (m, 2H), 7.34–7.30 (m, 1H), 7.24 (s, 1H), 6.70 (dd, *J*<sub>1</sub> = 8.3 Hz, *J*<sub>2</sub> = 2.2 Hz, 1H), 5.77 (d, *J* = 2.2 Hz, 1H), 3.53 (s, 3H), 2.40 (s, 3H). <sup>13</sup>C NMR (125 MHz, CDCl<sub>3</sub>): δ 191.8, 164.8, 147.7, 139.0, 137.5, 136.7, 134.8, 133.9, 132.8, 131.7, 130.5, 129.9, 129.8, 129.2, 128.9, 128.2, 126.4, 125.8, 124.3, 114.7, 108.6, 55.1, 22.0. HRMS (ESI) *m/z*: [M+H]<sup>+</sup> Calcd for C<sub>25</sub>H<sub>19</sub>O<sub>2</sub> 351.1385; Found 351.1388.

#### 2-fluoro-7-methyl-5-phenyl-11H-benzo[*b*]fluoren-11-one (3ra)



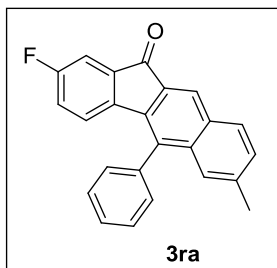

Yellow solid (78.4 mg, 58%). m.p. 206–208 °C. <sup>1</sup>H NMR (500 MHz, CDCl<sub>3</sub>): δ 8.18 (s, 1H), 7.83 (d, *J* = 8.2 Hz, 1H), 7.66–7.59 (m, 3H), 7.43–7.36 (m, 3H), 7.32 (dd, *J*<sub>1</sub> = 8.2 Hz, *J*<sub>2</sub> = 1.3 Hz, 1H), 7.20 (s, 1H), 6.86 (td, *J*<sub>1</sub> = 8.7, *J*<sub>2</sub> = 2.6 Hz, 1H), 6.23–6.19 (m, 1H), 2.40 (s, 3H). <sup>13</sup>C NMR (CDCl<sub>3</sub>, 125 MHz): δ 192.0 (d, *J* = 2.2 Hz), 163.1 (d, *J* = 250.4 Hz), 141.0 (d, *J* = 2.7 Hz), 139.7, 138.7 (d, *J* = 7.2 Hz), 137.4, 137.2, 134.8, 133.7 (d, *J* = 1.4 Hz), 131.9 (d, *J* = 1.7 Hz), 131.2, 130.7, 129.7, 129.4, 129.0, 128.4, 126.4, 125.5, 125.1 (d, *J* = 7.7 Hz), 121.1 (d, *J* = 22.9 Hz), 111.1 (d, *J* = 23.0 Hz), 22.1. HRMS (ESI) *m/z*: [M+H]<sup>+</sup> Calcd for C<sub>24</sub>H<sub>16</sub>OF 339.1185; Found 339.1180.

### 5-phenyl-11H-benzo[*b*]fluoren-11-one (3ab)

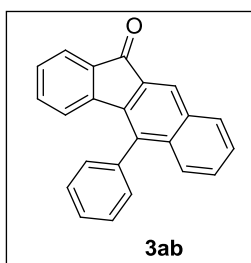

Yellow solid (84.2 mg, 55%). m.p. 230–232 °C (lit.<sup>5</sup> m.p. 232 °C). <sup>1</sup>H NMR (500 MHz, CDCl<sub>3</sub>): δ 8.24 (s, 1H), 7.94 (d, *J* = 7.3 Hz, 1H), 7.74 (d, *J* = 7.0 Hz, 1H), 7.65–7.59 (m, 3H), 7.50–7.40 (m, 5H), 7.25–7.17 (m, 2H), 6.35 (d, *J* = 7.4 Hz, 1H). <sup>13</sup>C NMR (125 MHz, CDCl<sub>3</sub>): δ 193.2, 145.1, 137.4, 136.9, 136.5, 135.3, 134.7, 134.6, 133.4, 132.5, 130.8, 129.7, 129.3, 128.9, 128.6, 128.3, 127.1, 126.8, 125.2, 124.2, 123.8.

### 7-methoxy-5-phenyl-11H-benzo[*b*]fluoren-11-one (3ac)

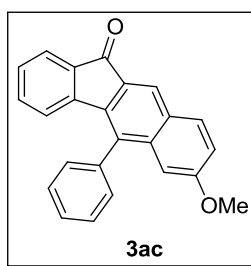

Yellow solid (65.8 mg, 49%). m.p. 126–127 °C. <sup>1</sup>H NMR (500 MHz, CDCl<sub>3</sub>): δ 8.16 (s, 1H), 7.84 (d, *J* = 8.9 Hz, 1H), 7.74–7.70 (m, 1H), 7.65–7.58 (m, 3H), 7.45–7.39 (m, 2H), 7.25–7.10 (m, 3H), 6.77 (d, *J* = 2.4 Hz, 1H), 6.30 (d, *J* = 7.5 Hz, 1H), 3.72 (s, 3H). <sup>13</sup>C NMR (125 MHz, CDCl<sub>3</sub>): δ 193.1, 160.2, 145.0, 138.7, 137.6, 136.7, 136.2, 134.4, 133.5, 132.3, 130.6, 129.7, 129.4, 128.6, 128.4, 128.3, 125.1, 124.0, 123.7, 118.1, 107.1, 55.2. HRMS (ESI) *m/z*: [M+H]<sup>+</sup> Calcd for C<sub>24</sub>H<sub>17</sub>O<sub>2</sub> 337.1229; Found 337.1223.

### 7-isopropyl-5-phenyl-11H-benzo[*b*]fluoren-11-one (3ad)

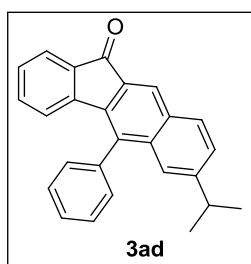

Yellow solid (71.2 mg, 51%). m.p. 166–167 °C. <sup>1</sup>H NMR (500 MHz, CDCl<sub>3</sub>): δ 8.21 (s, 1H), 7.89 (d, *J* = 8.4 Hz, 1H), 7.7–7.71 (m, 1H), 7.67–7.57 (m, 3H), 7.45–7.38 (m, 3H), 7.26–7.15 (m, 3H), 6.31 (d, *J* = 7.3 Hz, 1H), 2.98–2.89 (m, 1H), 1.23 (d, *J* = 6.9 Hz, 6H). <sup>13</sup>C NMR (125 MHz, CDCl<sub>3</sub>): δ 150.1, 145.2, 137.6, 137.1, 136.6, 135.4, 134.6,

134.4, 131.9, 131.9, 130.8, 129.7, 129.2, 128.5, 128.2, 126.1, 125.0, 124.08, 124.06, 123.7, 34.5, 23.7. HRMS (ESI)  $m/z$ :  $[M+H]^+$  Calcd for  $C_{26}H_{21}O$  349.1592; Found 349.1597.

### 5,9-diphenyl-11*H*-benzo[*b*]fluoren-11-one (3ae)

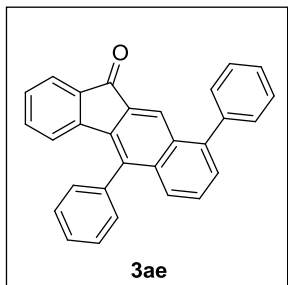

Yellow solid (67.2 mg, 44%). m.p. 208–209 °C.  $^1H$  NMR (500 MHz,  $CDCl_3$ ):  $\delta$  8.34 (s, 1H), 7.76–7.71 (m, 1H), 7.67–7.61 (m, 3H), 7.58–7.42 (m, 10H), 7.26–7.18 (m, 2H), 6.34 (d,  $J = 7.0$  Hz, 1H).  $^{13}C$  NMR (125 MHz,  $CDCl_3$ ):  $\delta$  193.2, 144.9, 143.4, 134.0, 137.7, 137.3, 136.6, 135.2, 134.8, 134.6, 132.4, 131.7, 130.0, 129.7, 129.3, 128.7, 128.6, 128.3, 128.25, 128.1, 127.7, 126.6, 124.2, 123.8, 123.6. HRMS

(ESI)  $m/z$ :  $[M+Na]^+$  Calcd for  $C_{29}H_{18}ONa$  405.1249; Found 405.1255.

### 6,8-dimethyl-5-phenyl-11*H*-benzo[*b*]fluoren-11-one (3af)

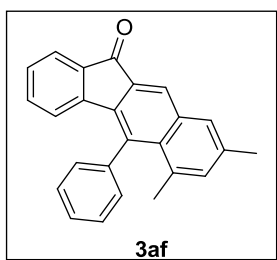

Yellow solid (88.2 mg, 66%). m.p. 193–194 °C.  $^1H$  NMR (500 MHz,  $CDCl_3$ ):  $\delta$  8.11 (d,  $J = 4.6$  Hz, 1H), 7.70 (d,  $J = 7.3$  Hz, 1H), 7.59–7.50 (m, 4H), 7.44–7.39 (m, 2H), 7.17 (td,  $J_1 = 7.4$  Hz,  $J_2 = 1.6$  Hz, 1H), 7.09 (dd,  $J_1 = 10.6$ ,  $J_2 = 4.5$  Hz, 2H), 5.82 (d,  $J = 7.8$  Hz, 1H), 2.43 (s, 3H), 1.97 (s, 3H).  $^{13}C$  NMR (125 MHz,  $CDCl_3$ ):  $\delta$  193.2,

145.8, 141.5, 136.9, 136.4, 136.4, 136.1, 135.7, 135.4, 135.2, 134.6, 132.8, 131.6, 129.8, 129.7, 128.8, 128.2, 128.1, 125.8, 123.9, 123.86, 25.0, 20.9. HRMS (ESI)  $m/z$ :  $[M+H]^+$  Calcd for  $C_{25}H_{19}O$  335.1436; Found 335.1444.

### methyl 9-methyl-11-oxo-5-phenyl-11*H*-benzo[*b*]fluorene-6-carboxylate (3ag)

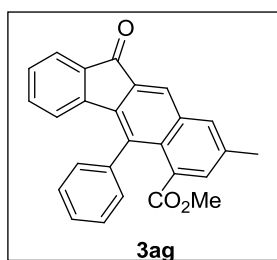

Yellow solid (81.7 mg, 54%). m.p. 216–217 °C.  $^1H$  NMR (500 MHz,  $CDCl_3$ ):  $\delta$  8.49 (s, 1H), 7.74 (d,  $J = 7.3$  Hz, 1H), 7.57–7.53 (m, 3H), 7.44–7.38 (m, 3H), 7.35–7.32 (m, 1H), 7.25–7.20 (m, 1H), 7.18–7.11 (m, 1H), 6.00 (d,  $J = 7.8$  Hz, 1H), 3.23 (s, 3H), 2.80 (s, 3H).  $^{13}C$  NMR (125 MHz,  $CDCl_3$ ):  $\delta$  193.1, 170.2, 145.0, 140.1, 137.7, 137.4, 136.5,

134.8, 134.5, 133.5, 132.8, 132.5, 131.9, 131.2, 129.9, 128.9, 128.6, 128.5, 126.9, 124.2, 124.1, 121.6, 51.9, 20.3. HRMS (ESI)  $m/z$ :  $[M+H]^+$  Calcd for  $C_{26}H_{19}O_3$  379.1329; Found 379.1323.

### 7-chloro-9-methyl-5-phenyl-11*H*-benzo[*b*]fluoren-11-one (3ah)

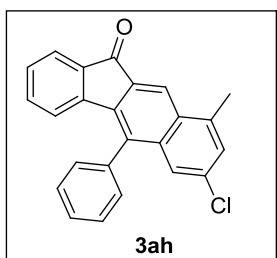

Yellow solid (70.9 mg, 50%). m.p. 203–205 °C. <sup>1</sup>H NMR (500 MHz, CDCl<sub>3</sub>): δ 8.39 (s, 1H), 7.74 (d, *J* = 7.1 Hz, 1H), 7.65–7.60 (m, 3H), 7.40–7.36 (m, 2H), 7.29 (d, *J* = 5.1 Hz, 2H), 7.27–7.18 (m, 2H), 6.28 (d, *J* = 7.5 Hz, 1H), 2.75 (s, 3H). <sup>13</sup>C NMR (125 MHz, CDCl<sub>3</sub>): δ 193.1, 144.7, 139.5, 138.2, 137.0, 136.5, 136.3, 134.8, 134.7, 134.3, 132.3, 131.0, 129.6, 129.4, 128.9, 128.6, 128.4, 124.4, 124.3, 123.9, 121.2, 19.6. HRMS (ESI) *m/z*: [M+H]<sup>+</sup> Calcd for C<sub>24</sub>H<sub>16</sub>OCl 355.0890; Found 355.0889.

#### 7-nitro-5-phenyl-11H-benzo[b]fluoren-11-one (3ai)

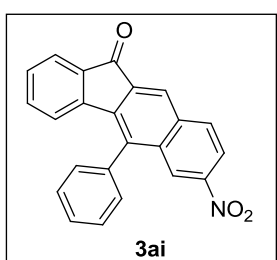

Yellow solid (26.3 mg, 25%). m.p. 236–237 °C. <sup>1</sup>H NMR (500 MHz, CDCl<sub>3</sub>): δ 8.36 (d, *J* = 2.0 Hz, 1H), 8.27–8.21 (m, 2H), 8.07 (d, *J* = 11.0 Hz, 1H), 7.76 (d, *J* = 9.0 Hz, 1H), 7.67 (d, *J* = 4.5 Hz, 1H), 7.66–7.65 (m, 3H), 7.43–7.34 (m, 3H), 6.38 (d, *J* = 9.5 Hz, 1H). <sup>13</sup>C NMR (125 MHz, CDCl<sub>3</sub>): δ 193.2, 147.6, 144.5, 137.2, 136.3, 136.2, 136.1, 135.7, 135.6, 135.3, 132.0, 129.8, 129.7, 129.6, 129.5, 129.2, 124.6, 124.3, 124.2, 123.1, 120.3. HRMS (ESI) *m/z*: [M+H]<sup>+</sup> Calcd for C<sub>23</sub>H<sub>14</sub>NO<sub>3</sub> 352.0974; Found 352.0971.

#### 11-oxo-5-phenyl-11H-benzo[b]fluorene-7-carbonitrile (3aj)

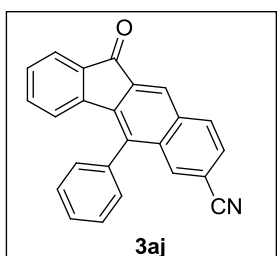

Yellow solid (16.9 mg, 17%). m.p. 235–236 °C. <sup>1</sup>H NMR (500 MHz, CDCl<sub>3</sub>): δ 8.23 (s, 1H), 8.02 (d, *J* = 10.5 Hz, 1H), 7.81 (s, 1H), 7.66 (d, *J* = 4.5 Hz, 1H), 7.65–7.63 (m, 4H), 7.39–7.37 (m, 2H), 7.26–7.23 (m, 2H), 6.37 (d, *J* = 9.0 Hz, 1H). <sup>13</sup>C NMR (125 MHz, CDCl<sub>3</sub>): δ 192.4, 144.5, 137.0, 136.3, 136.2, 135.9, 135.3, 135.1, 135.0, 134.8, 132.7, 131.6, 129.7, 129.5, 129.1, 127.5, 124.6, 124.5, 124.2, 118.8, 112.1. HRMS (ESI) *m/z*: [M+H]<sup>+</sup> Calcd for C<sub>24</sub>H<sub>14</sub>NO 332.1075; Found 332.1077.

#### 7-chloro-5-phenyl-11H-benzo[b]fluoren-11-one (3ak)

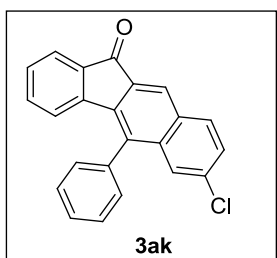

Yellow solid (30.6 mg, 30%). m.p. 184–185 °C. <sup>1</sup>H NMR (500 MHz, CDCl<sub>3</sub>): δ 8.15 (s, 1H), 7.84 (d, *J* = 11.0 Hz, 1H), 7.71 (d, *J* = 9.0 Hz, 1H), 7.62–7.61 (m, 3H), 7.40–7.36 (m, 4H), 7.23–7.18 (m, 2H), 6.30 (d, *J* = 9.0 Hz, 1H). <sup>13</sup>C NMR (125 MHz, CDCl<sub>3</sub>): δ 192.9, 144.7, 137.8, 136.6, 136.5, 135.3, 134.9, 133.8, 132.8, 132.0, 131.7, 129.6, 129.5, 129.0, 128.7, 127.7, 126.2, 124.8, 124.3, 124.0. HRMS (ESI) *m/z*: [M+H]<sup>+</sup> Calcd for

C<sub>23</sub>H<sub>14</sub>ClO 341.0733; Found 341.0729.

## 6. Scale-up experiment

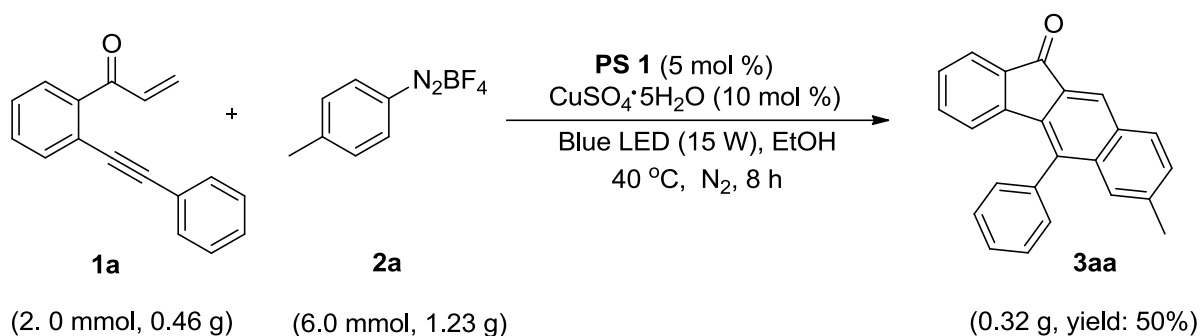

4-Methylphenyldiazonium tetrafluorborate **2a** (6.0 mmol, 1.23 g, 3 equiv. based on **1a**), **PS 1** (0.12 g, 5 mol % based on **1a**) and **CuSO<sub>4</sub> · 5H<sub>2</sub>O** (50.0 mg, 10 mol % based on **1a**) were placed in a 50 mL Schlenk tube. The tube was evacuated and refilled with N<sub>2</sub> three times. 1-(2-(phenylethynyl)phenyl)prop-2-en-1-one **1a** (0.46 g, 2.0 mmol) and EtOH (20 mL) were added, and the resulting mixture was irradiated with a blue LED lamp (15 W) at 40 °C under N<sub>2</sub> atmosphere for 8 h. Upon completion, the reaction mixture was evaporated and purified by column chromatography on silica gel (100-200 mesh), eluting with the indicated mixture of EA/PE (1:20 (v/v)) to give the pure product **3aa** (0.32 g, 50% yield).

## 7. Mechanistic experiments.

### 7.1 Radical scavenging experiment

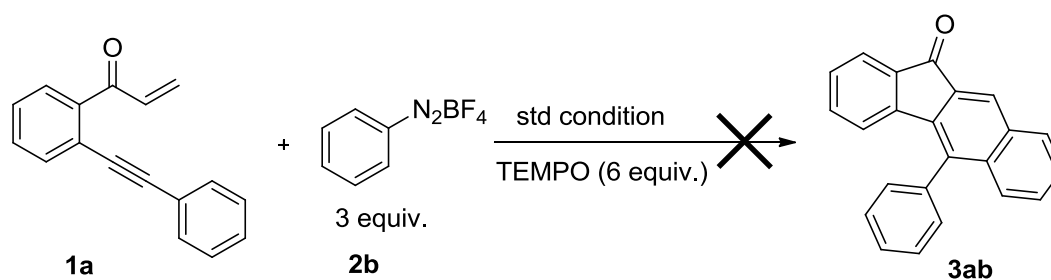

To a 25 mL Schlenk tube were added **1a** (92.9 mg, 0.4 mmol), **2b** (229.2 mg, 1.2 mmol), TEMPO (375.0 mg, 2.4 mmol, 6.0 equiv. based on **1a**), **PS 1** (23.0 mg, 5 mol % based on **1a**) and **CuSO<sub>4</sub> · 5H<sub>2</sub>O** (10.0 mg, 10 mol % based on **1a**), the tube was evacuated and refilled with N<sub>2</sub> for three times. Then 4 mL EtOH was added under nitrogen atmosphere. The reaction mixture was irradiated at a distance of 3 cm from 15 W blue LED light. The reaction mixture was stirred at 40 °C for 4 h. Upon completion, the reaction mixture was sent for GC analysis

and none of the desired product **3ab** was detected.

### 7.2 Subjection of **4** to the standard reaction conditions.

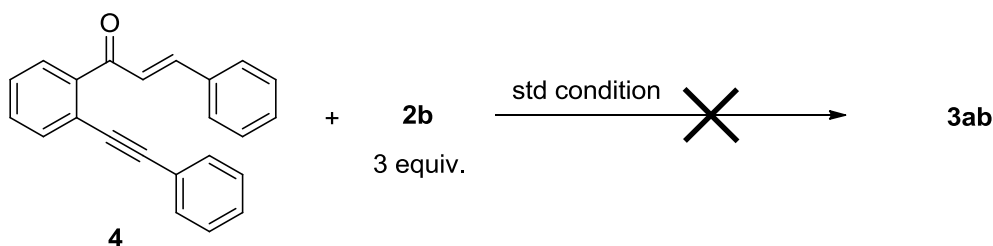

To a 25 mL Schlenk tube were added **4**<sup>6</sup> (123.2 mg, 0.4 mmol), **2b** (229.2 mg, 1.2 mmol), *PS 1* (23.0 mg, 5 mol % based on **4**) and CuSO<sub>4</sub> • 5H<sub>2</sub>O (10.0 mg, 10 mol % based on **4**), the tube was evacuated and refilled with N<sub>2</sub> for three times. Then 4 mL EtOH was added under nitrogen atmosphere. The reaction mixture was irradiated at a distance of 3 cm from 15 W blue LED light. The reaction mixture was stirred at 40 °C for 4 h. Upon completion, the reaction mixture was sent for GC analysis and none of the desired product **3ab** was detected. The starting material **4** was almost quantitatively recovered.

### 7.3 Intramolecular H/D competition experiment

#### Synthesis of **2b-d1**<sup>7</sup>

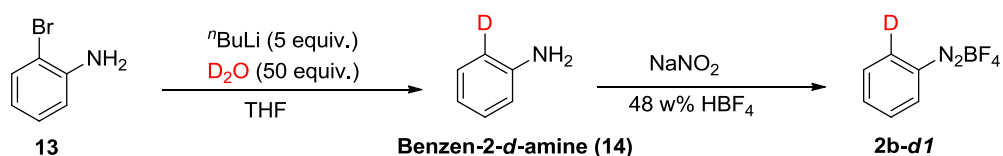

In a 100 mL of flask, <sup>n</sup>BuLi (80 mmol, 32 mL, 2.5 M in hexane) was added to 2-bromoaniline **13** (16 mmol, 2.75 g) in THF (20 mL) under N<sub>2</sub> atmosphere, and the mixture was stirred at -78 °C for 1 h. Then the mixture was warmed to rt and stirred for 1 h. D<sub>2</sub>O (0.8 mol, 14.4 mL) was added to the reaction at -78 °C, which was warmed to rt and stirred for 1 h. The reaction mixture was quenched with water (20 mL) and extracted with ethyl acetate (50 mL × 2). The organic layer were combined, dried over Na<sub>2</sub>SO<sub>4</sub> and concentrated under reduced pressure. The residue was purified by chromatography to give **Benzen-2-d-amine 14** (601 mg, 40%) whose deuterated rate is >99%.

**Benzen-2-d-amine 14** (5 mmol, 470 mg) was added to a mixture of 50% HBF<sub>4</sub> (1.5 mL) and distilled water (3 mL) in ice bath. To this solution, an ice-cold solution of sodium nitrite (352 mg, 1.02 equiv.) in distilled water (1.5 mL) was added. After stirring for 30 mins, the

precipitate was collected on a hirsch funnel and washed with small amount of ice-cold distilled water. The solid was dissolved in acetone and precipitated with slow addition of ethyl ether. **2b-d1** were obtained after repeat this trituration two to three times. (771 mg, 80%).

**Subjection 2b-d1 to react with 1a under the standard reaction conditions:**

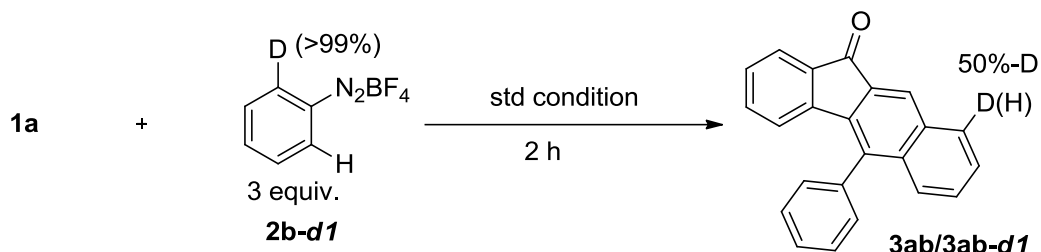

**1a** (92.9 mg, 0.4 mmol), **2b-d1** (231.5 mg, 1.2 mmol), **PS 1** (23.0 mg, 5 mol % based on **1a**) and  $\text{CuSO}_4 \cdot 5\text{H}_2\text{O}$  (10.0 mg, 10 mol % based on **1a**), the tube was evacuated and refilled with  $\text{N}_2$  for three times. Then 4 mL EtOH was added under nitrogen atmosphere. The reaction mixture was irradiated at a distance of 3 cm from 15 W blue LED light. The reaction mixture was stirred at 40 °C for 2 h. Upon completion, the reaction mixture was evaporated and purified by column chromatography on silica gel (100-200 mesh), eluting with the indicated mixture of EA/PE (1:20 (v/v)) to give the pure product **3ab/3ab-d1** (46.9 mg, 40%). The  $^1\text{H}$  NMR spectra of **3ab/3ab-d1** and the calculated D incorporated rate are listed as below:

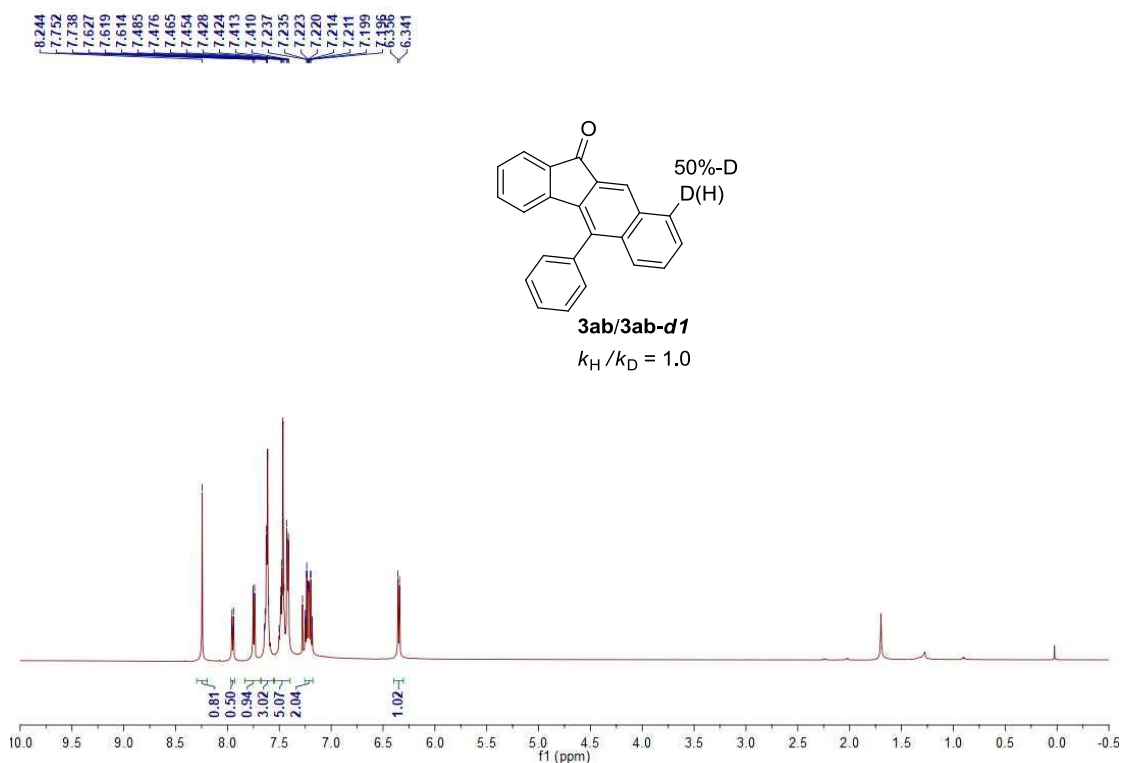

Analytical data of **3ab/3ab-d1**:  $^1\text{H}$  NMR (500 MHz,  $\text{CDCl}_3$ ):  $\delta$  8.24 (s, 1H), 7.94 (d,  $J = 7.3$  Hz, 0.5H), 7.74 (d,  $J = 7.0$  Hz, 1H), 7.65–7.59 (m, 3H), 7.50–7.40 (m, 5H), 7.25–7.17 (m, 2H), 6.35 (d,  $J = 7.4$  Hz, 1H).

When **2b-d1** was used, the reaction did not exhibit a primary kinetic isotope effect in the intramolecular competition experiment ( $k_{\text{H}}/k_{\text{D}} = 1.0$ ), suggesting that the C-H bond cleavage in the late-stage cyclization process is not the rate-determining step.

## 8. References

- [1] J. Zhang, Y. Xiao, K. Chen, W. Wu, H. Jiang and S. Zhu, *Adv. Synth. Catal.*, 2016, **358**, 2684.
- [2] A. Ahrens, N. Heinrich, F. Niklas, S. R. Kohl, M. Hokamp, M. Rodolph, F. Rominger and A. S. K. Hashmi, *Adv. Synth. Catal.*, 2019, **361**, 5605.
- [3] P. Hanson, J. R. Jones, A. B. Taylor, P. H. Walton and A. W. Timms, *J. Chem. Soc., Perkin Trans. 2*, 2002, 1135.
- [4] L. Zheng, H. Xue, B. Zhou, S.-P. Luo, H. Jin and Y. Liu, *Org. Lett.*, 2021, **23**, 4478.
- [5] W. Ried and G. Clauss, *Justus Liebigs Ann. Chem.* 1975, 953.
- [6] L. Zheng, B. Zhou, H. Jin, T. Li and Y. Liu, *Org. Lett.*, 2018, **20**, 7053.
- [7]. Y.-X. Wang, F.-P. Zhang, Y.-X. Luan and M. Ye, *Org. Lett.*, 2020, **22**, 2230-2234

## 9. $^1\text{H}$ and $^{13}\text{C}$ NMR spectra of unknown starting materials.

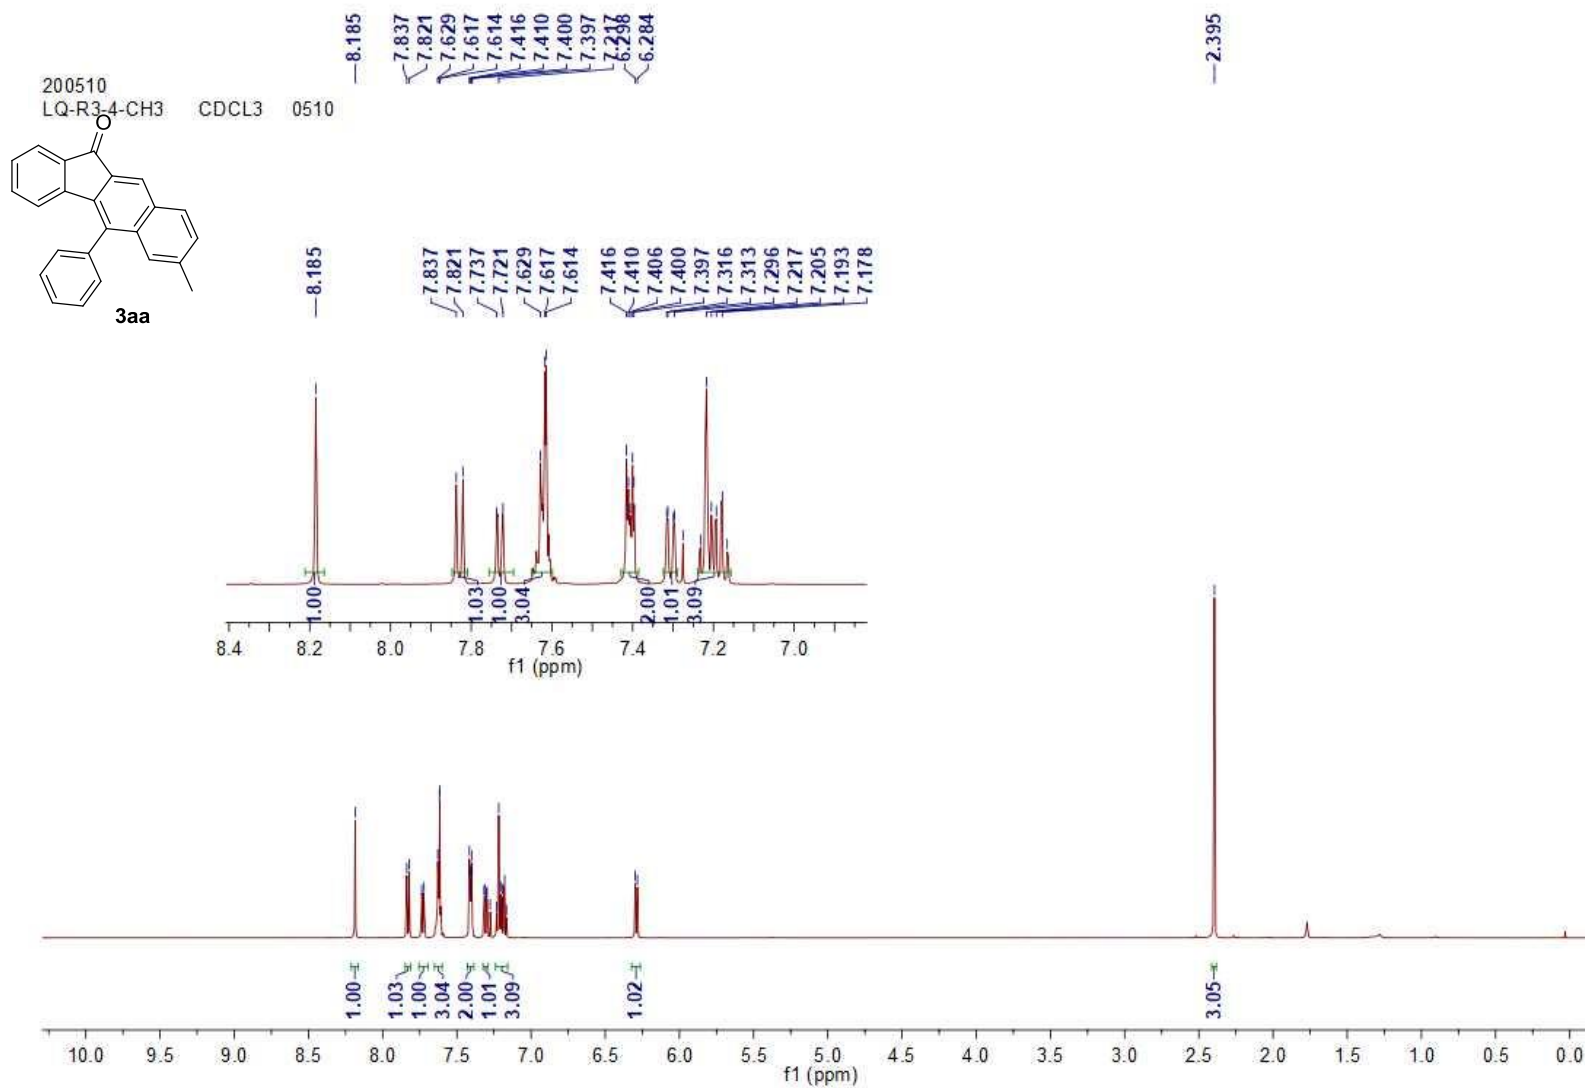



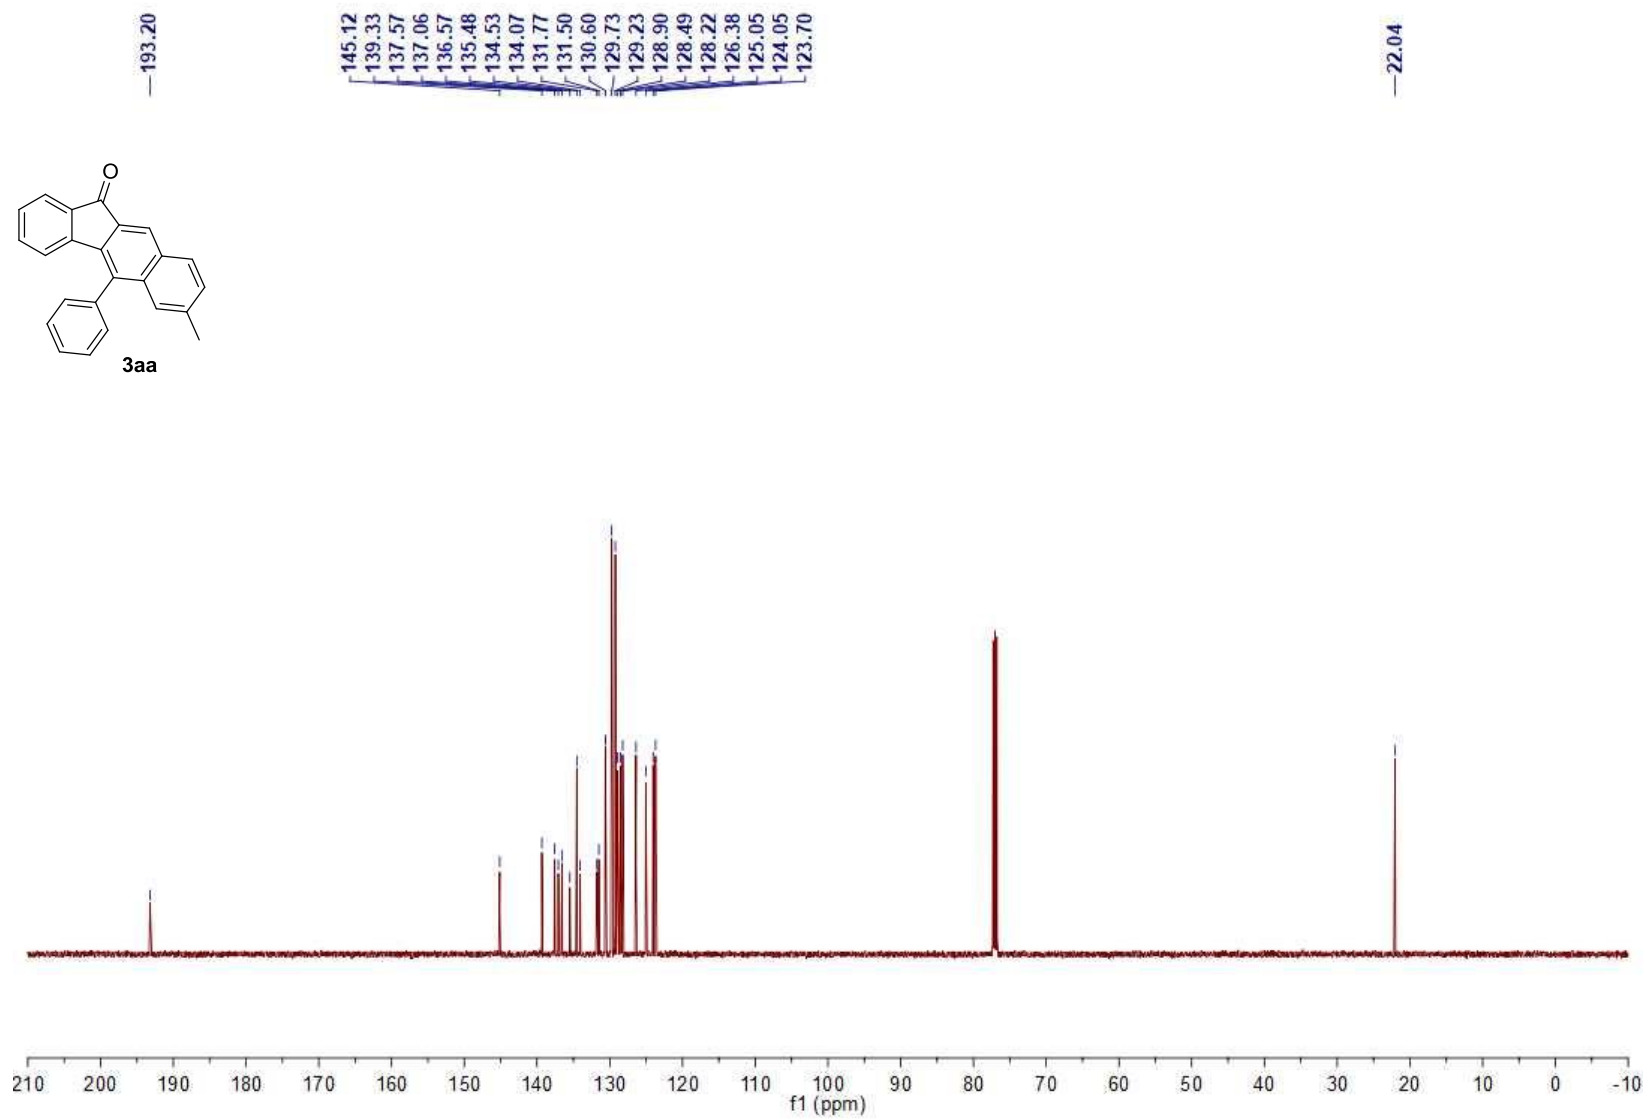

200116  
LQ-R2-2-CH3 CDC13 0116

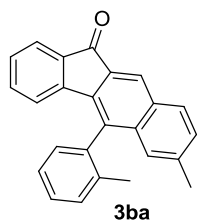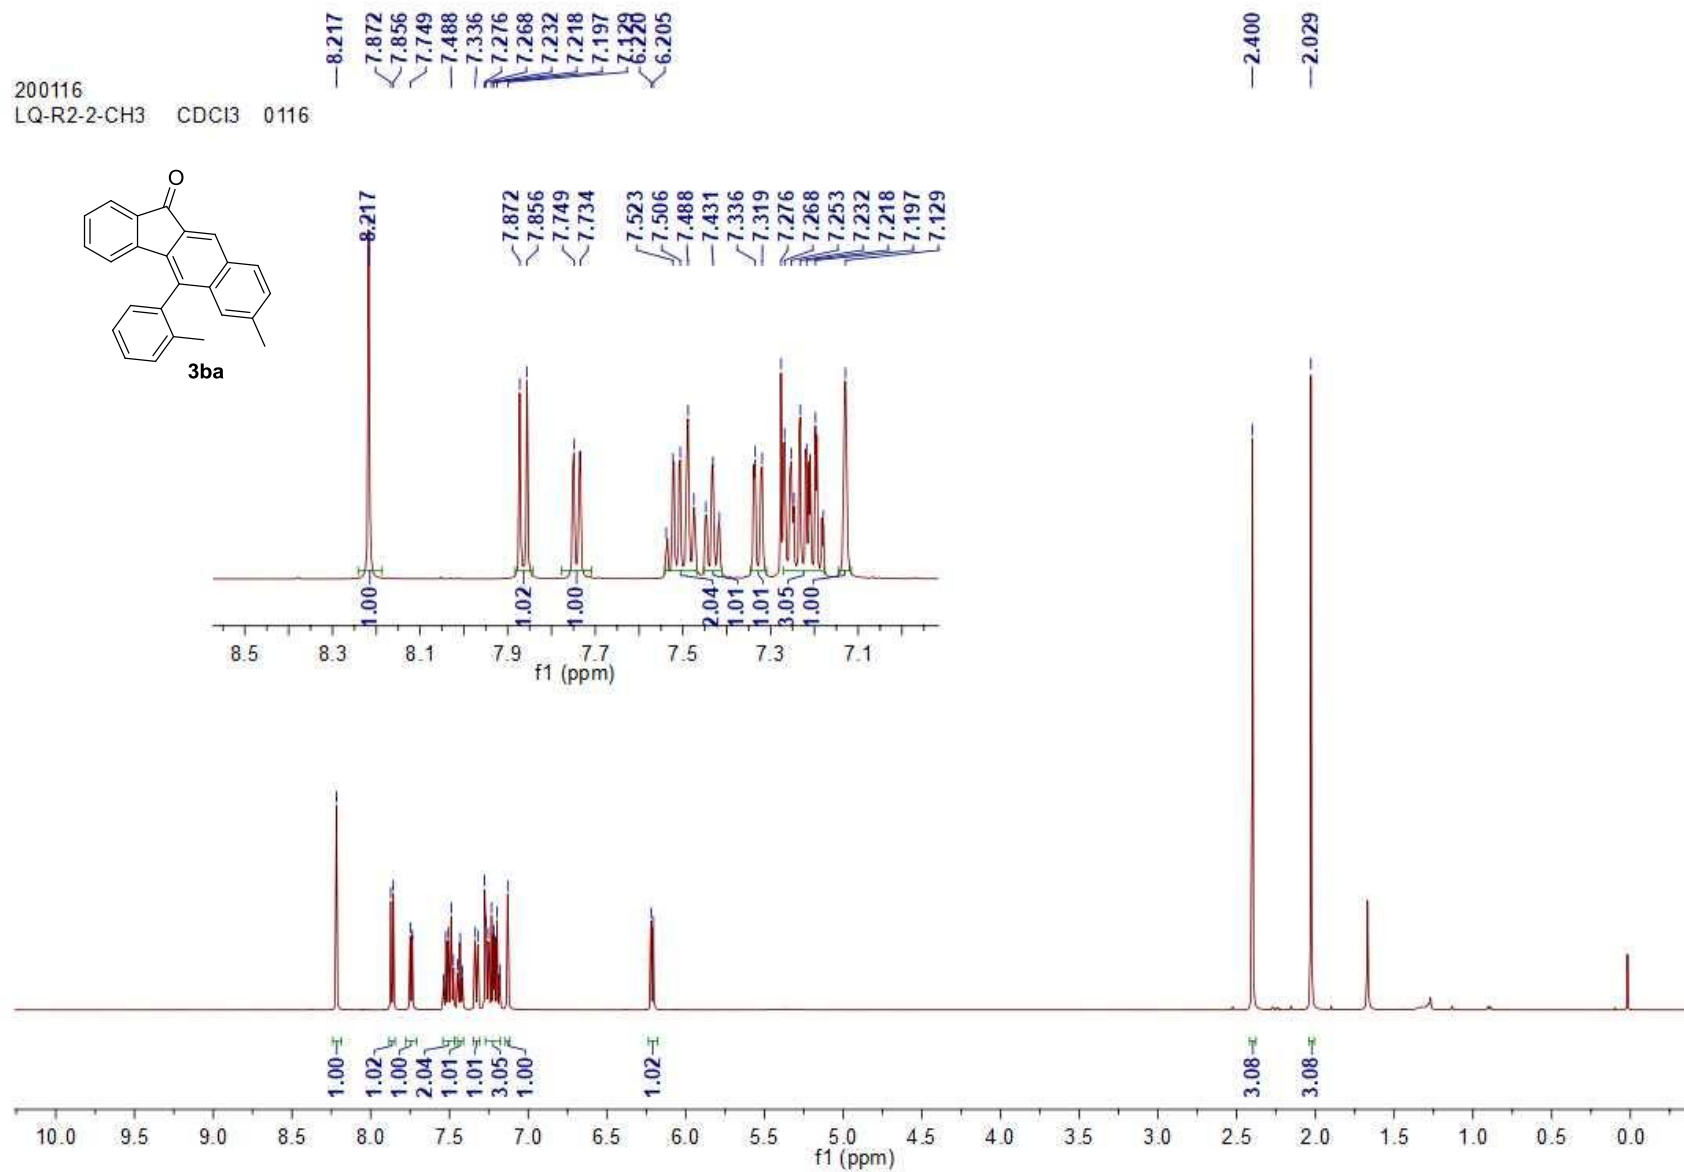

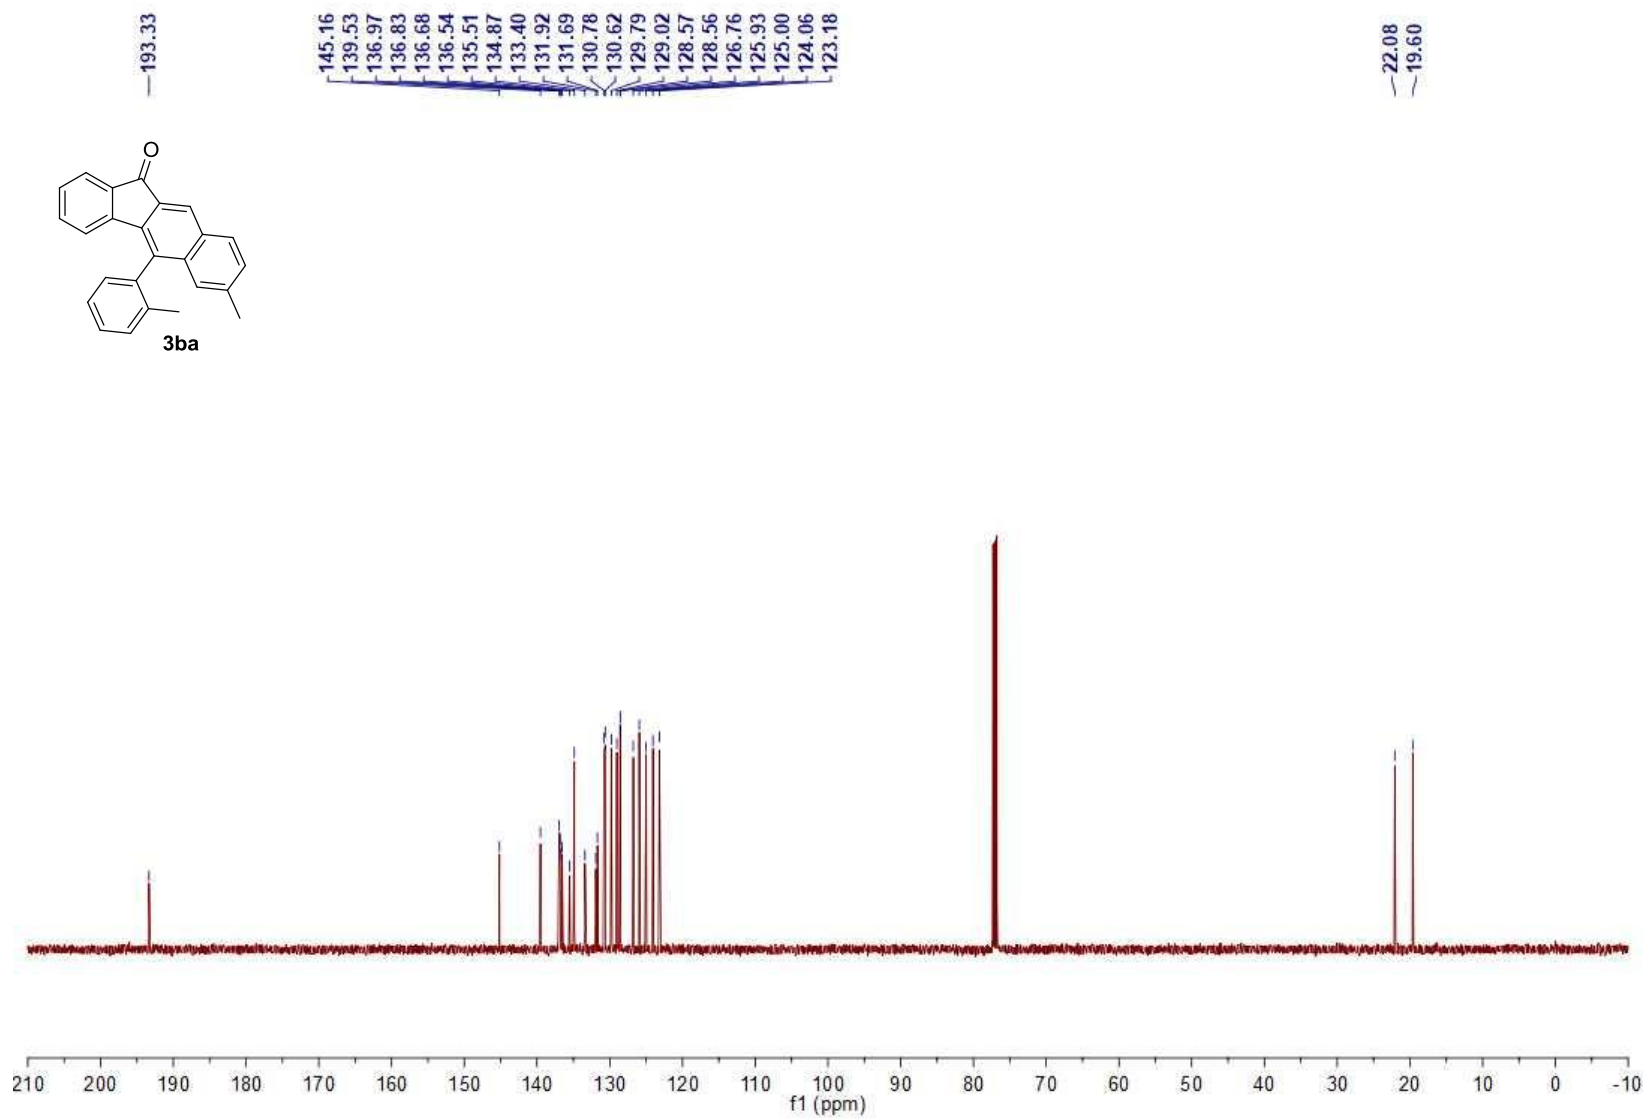

200506  
LQ-R2-3-CH3 CDCl3 0506

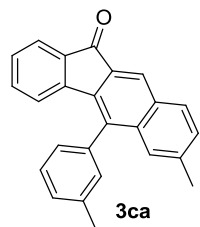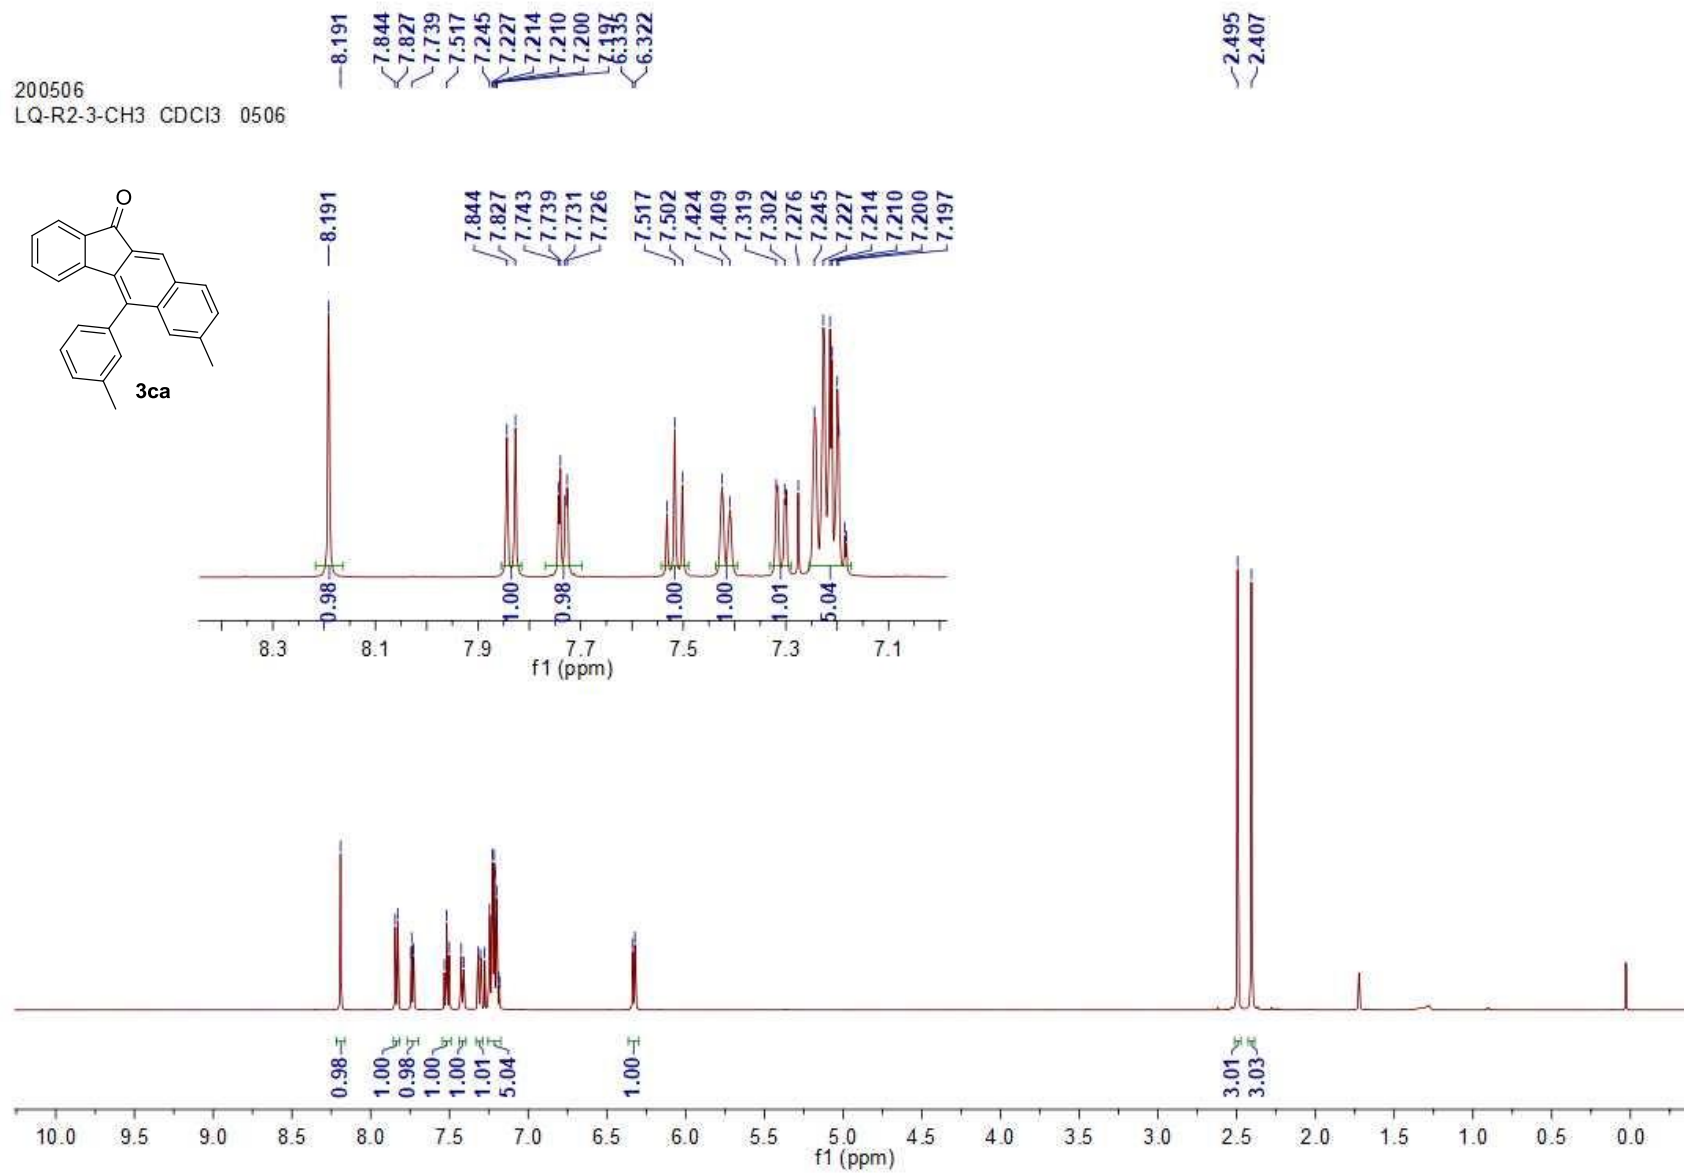

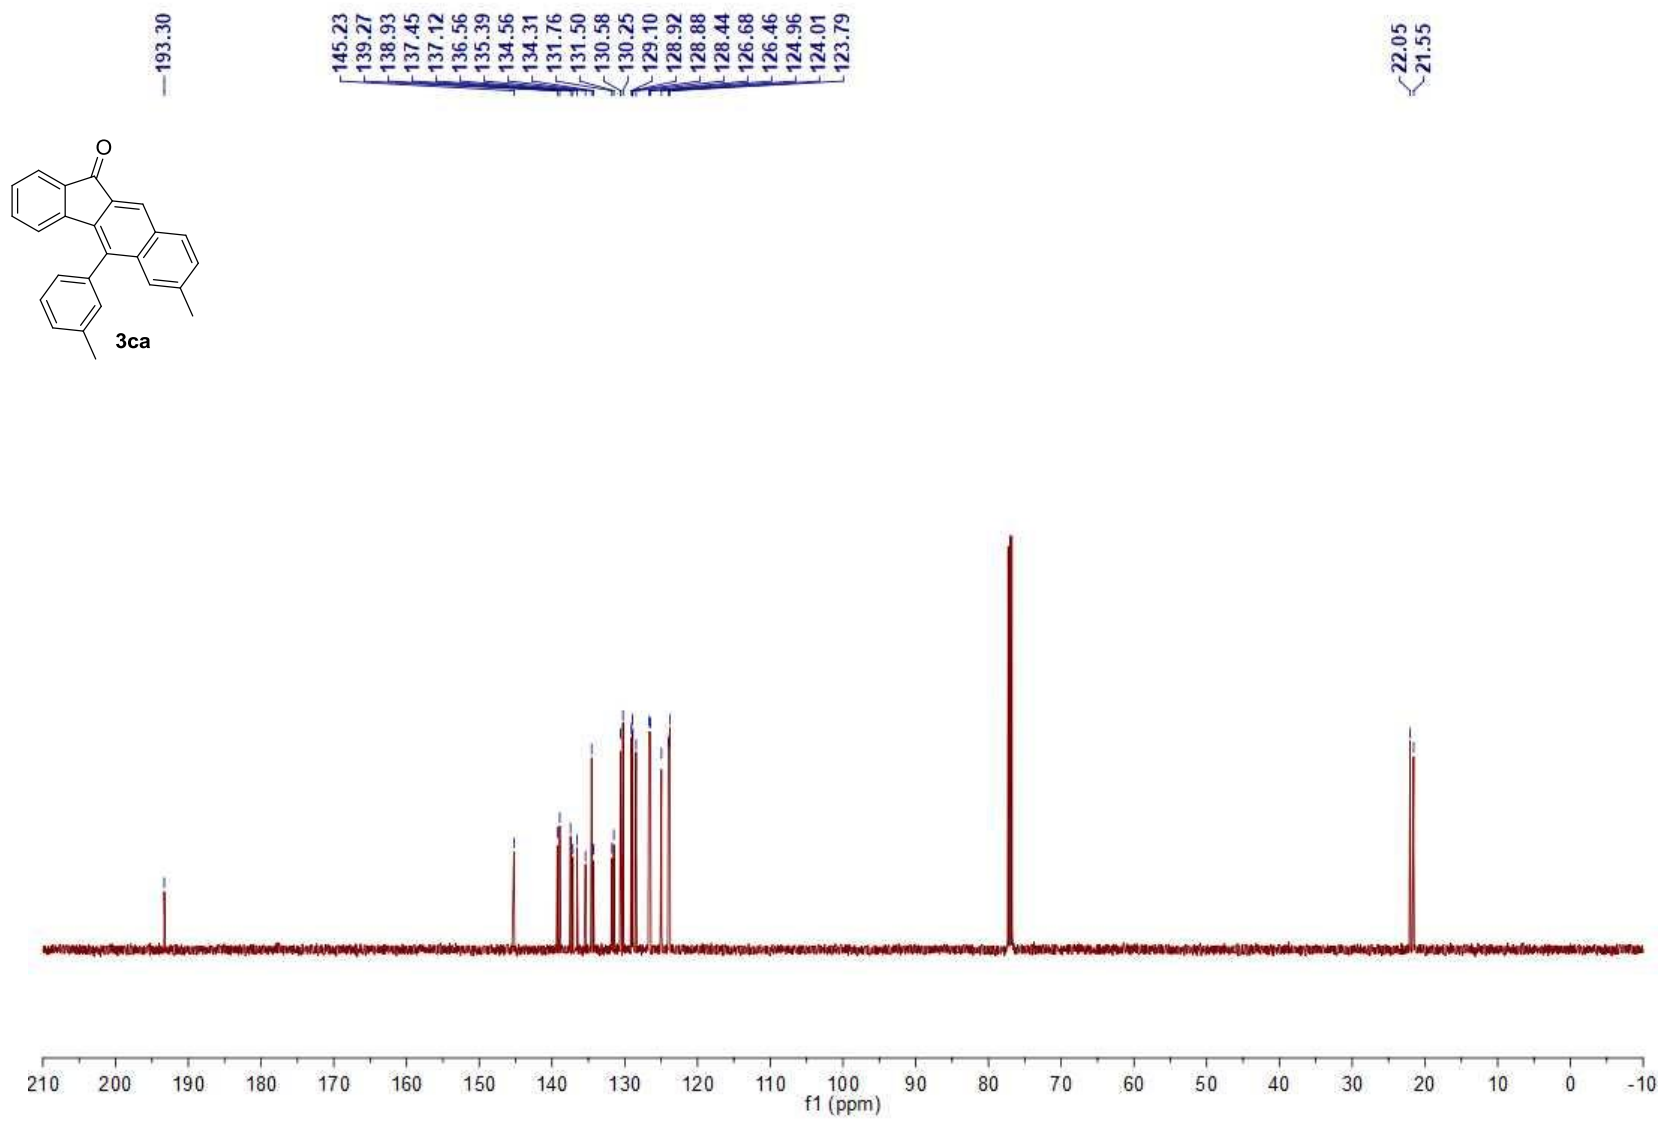

200506  
LQ-R2-4-CH3 CDCl3 0506

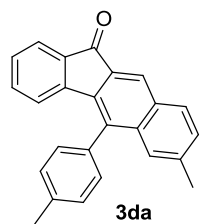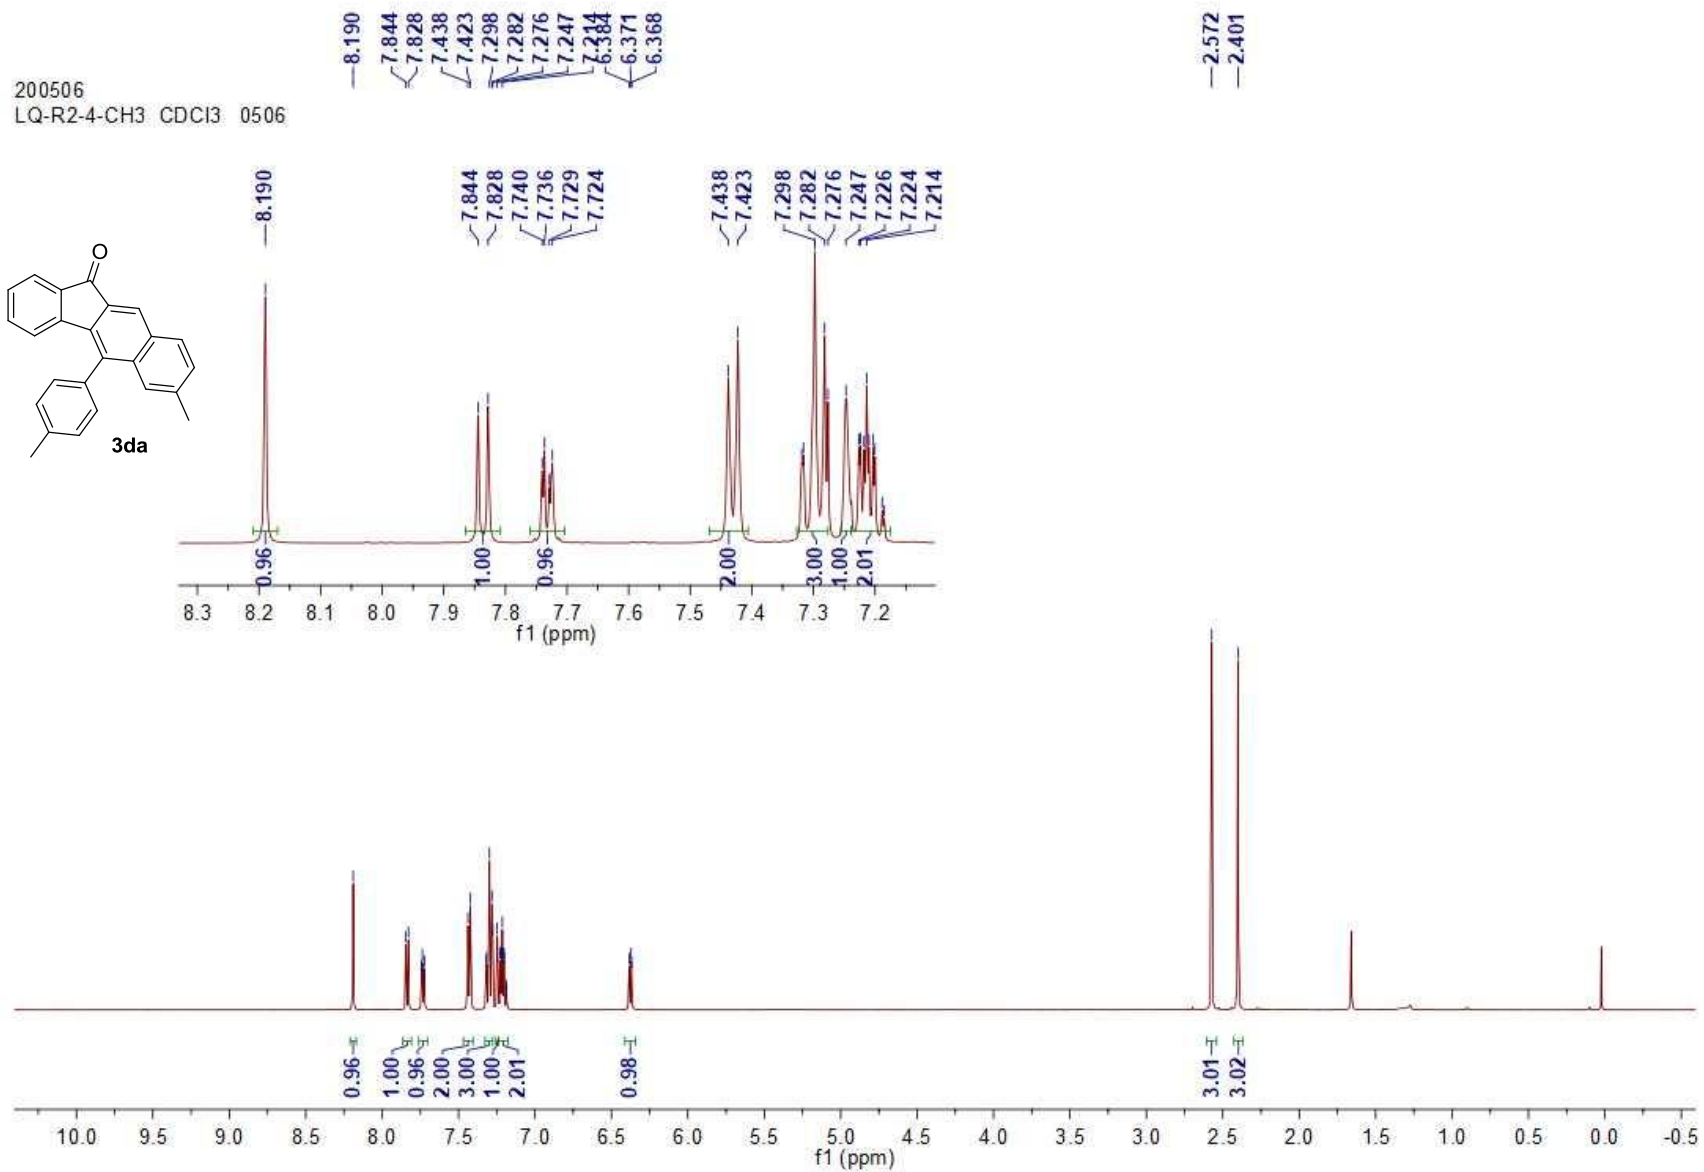

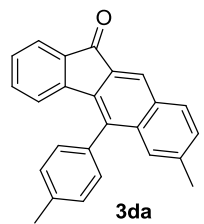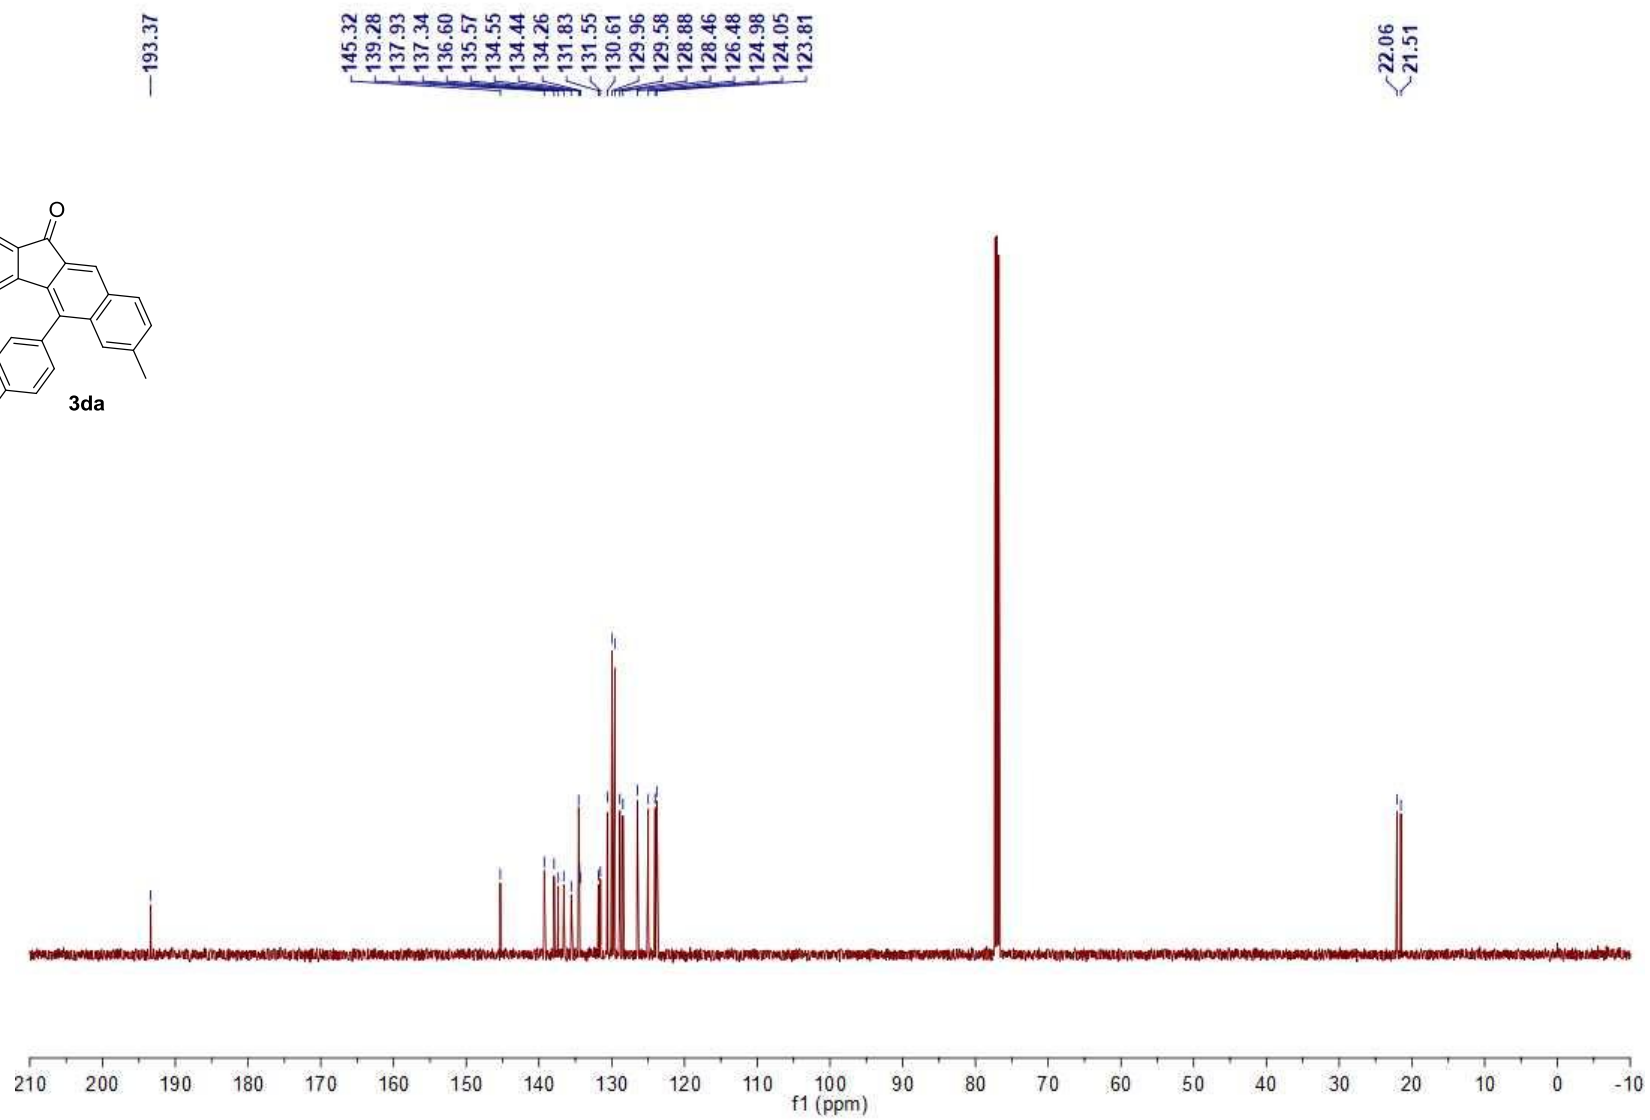

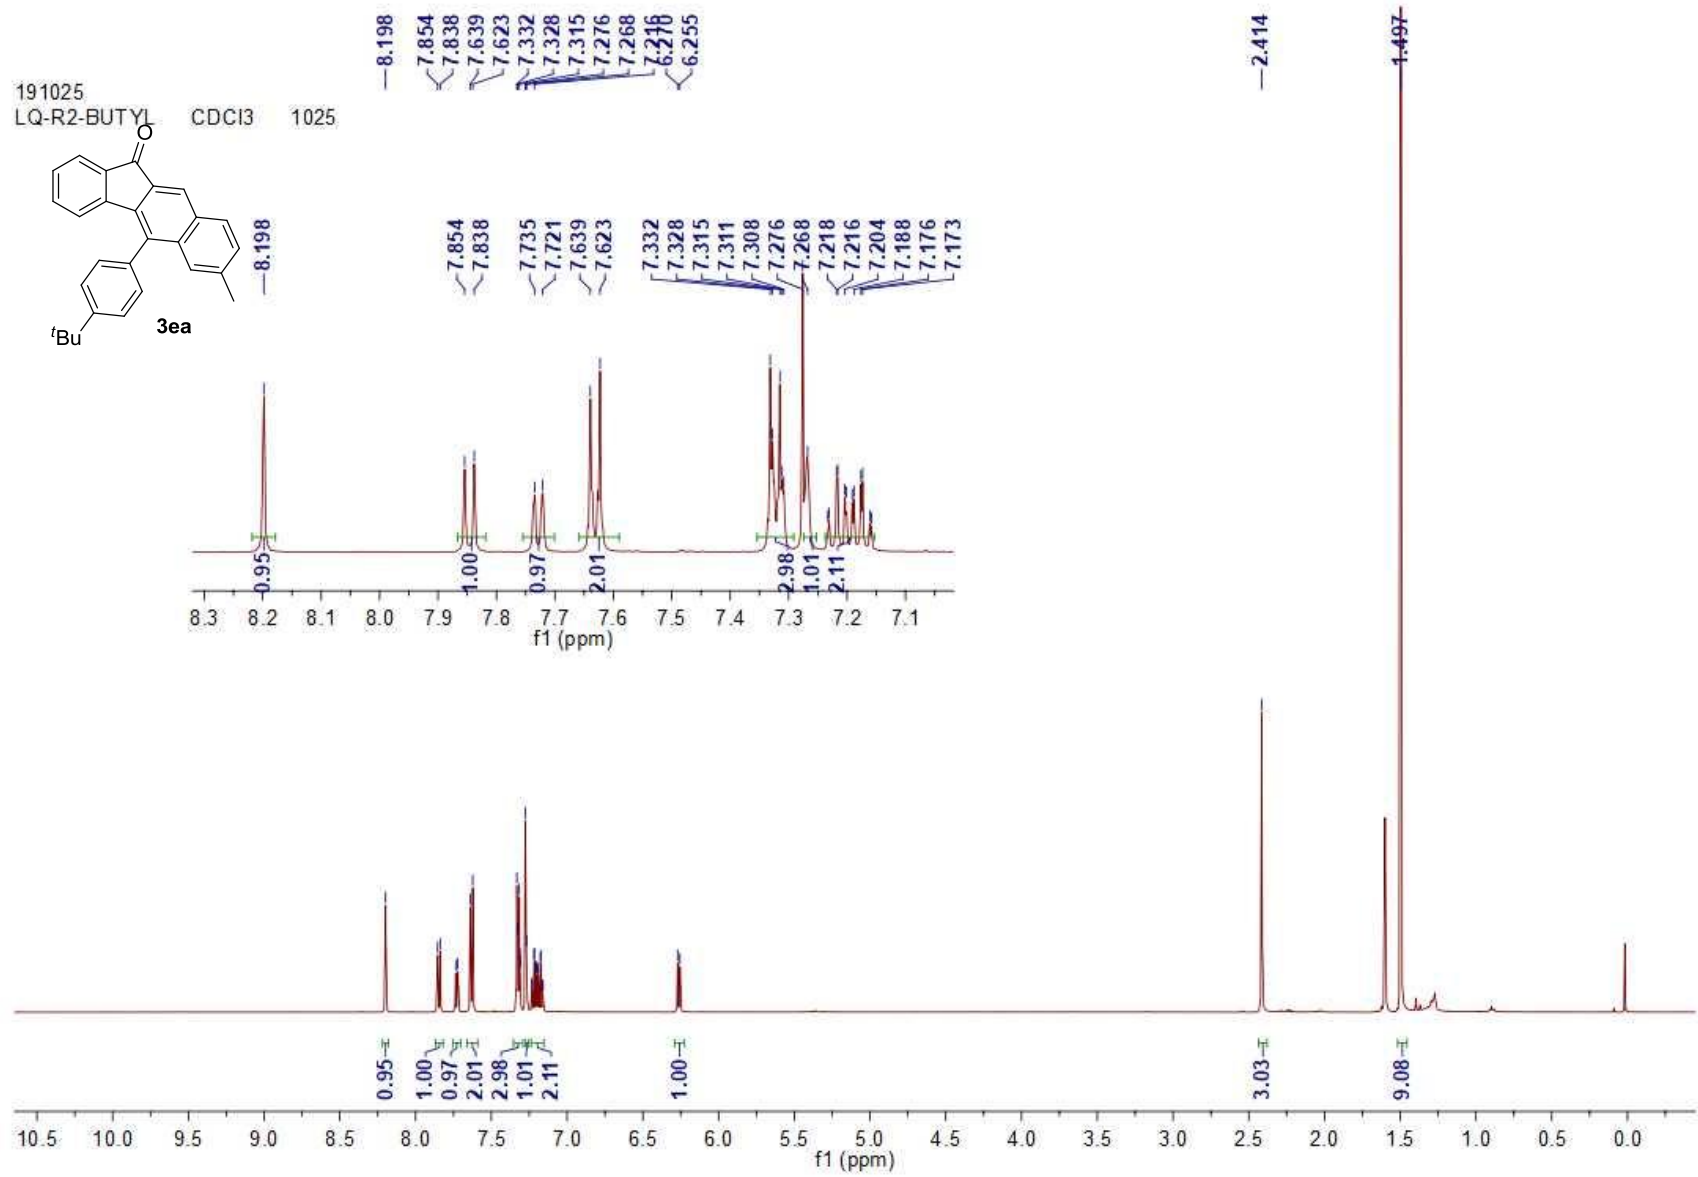



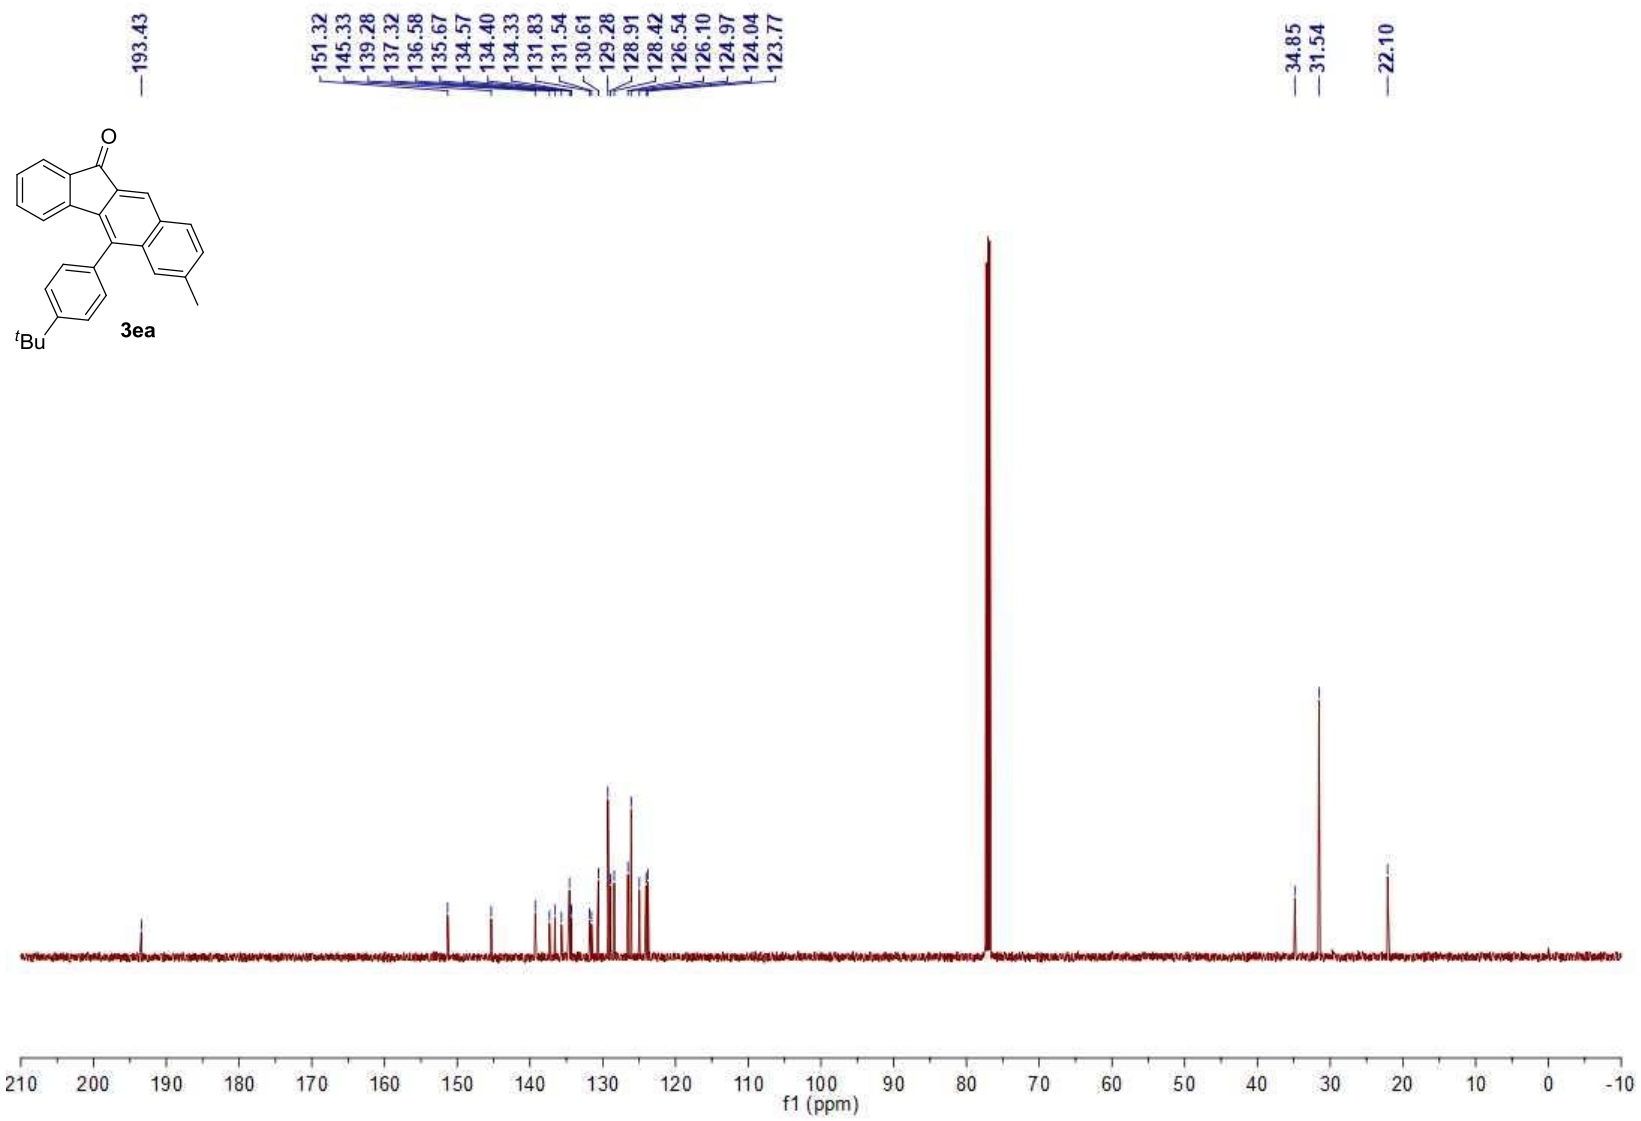

200507  
LQ-R2-4-OCH3 CDCl3 0507

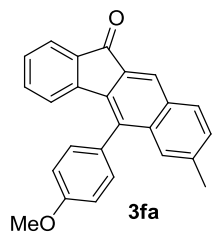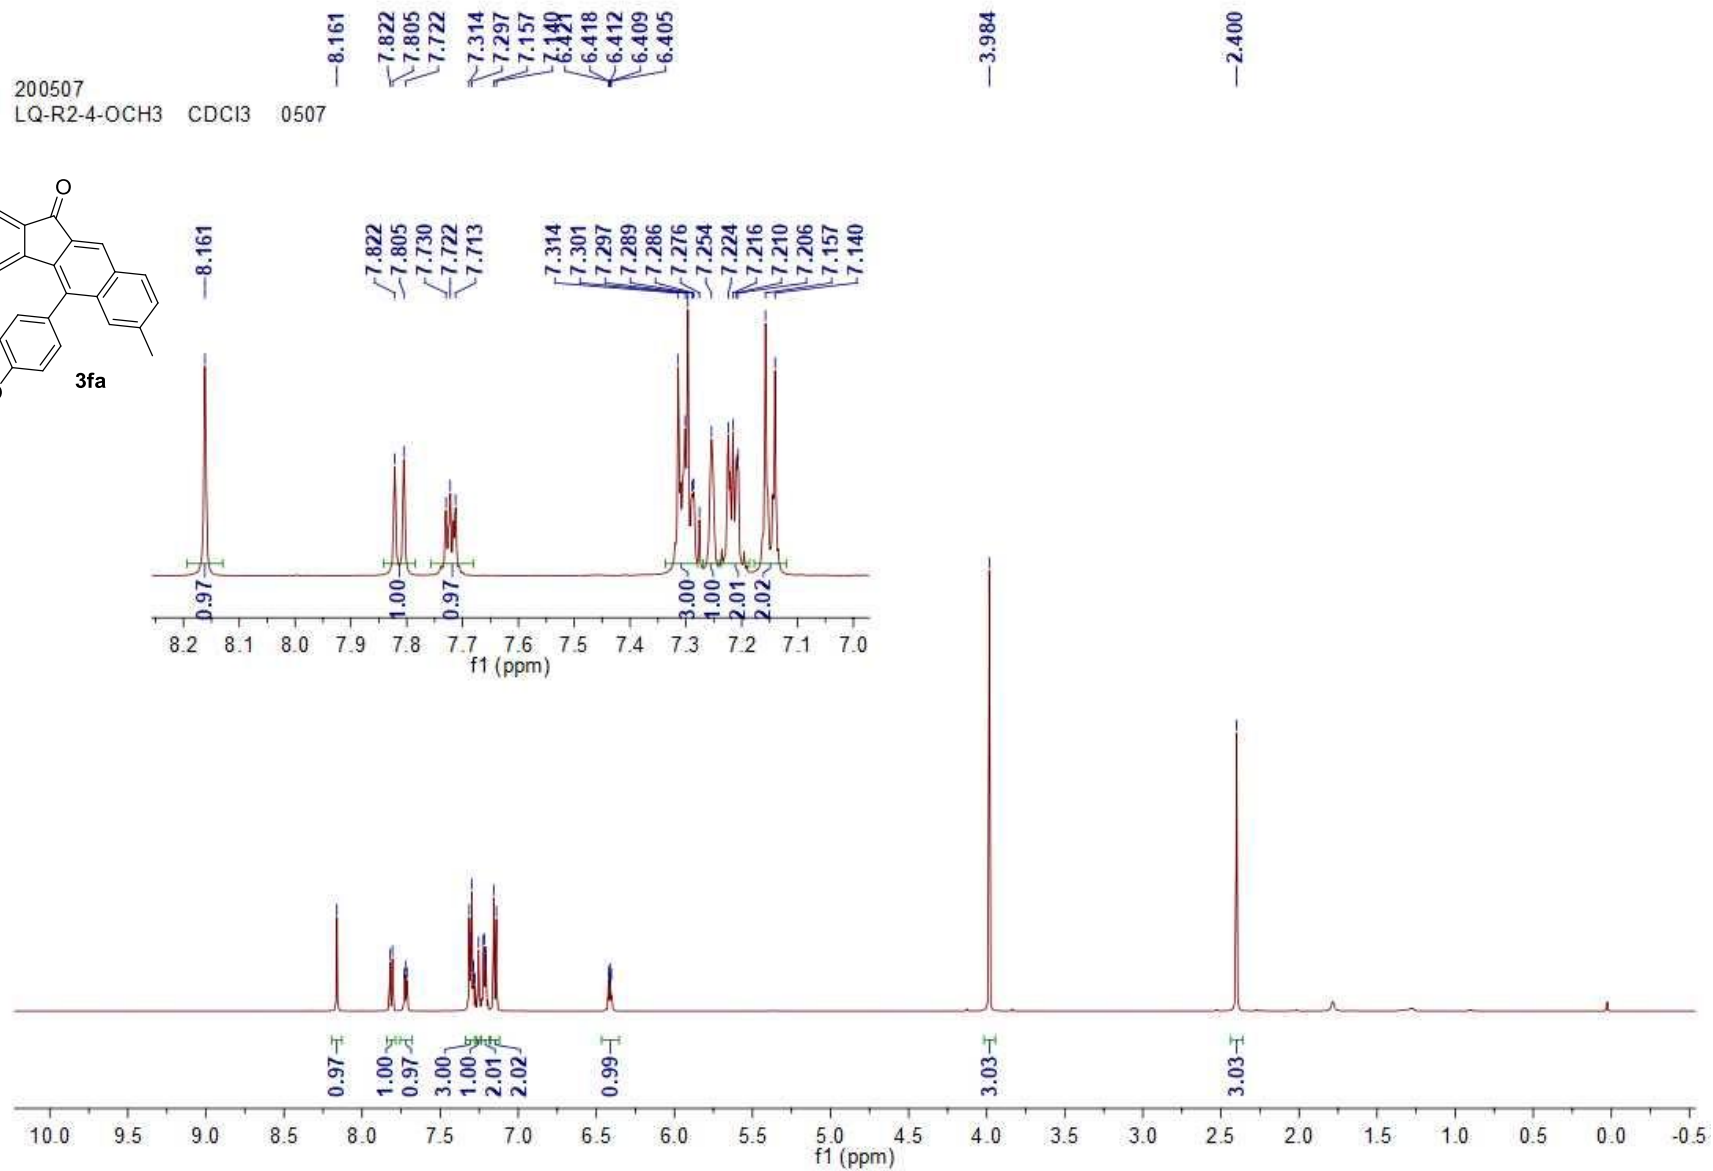

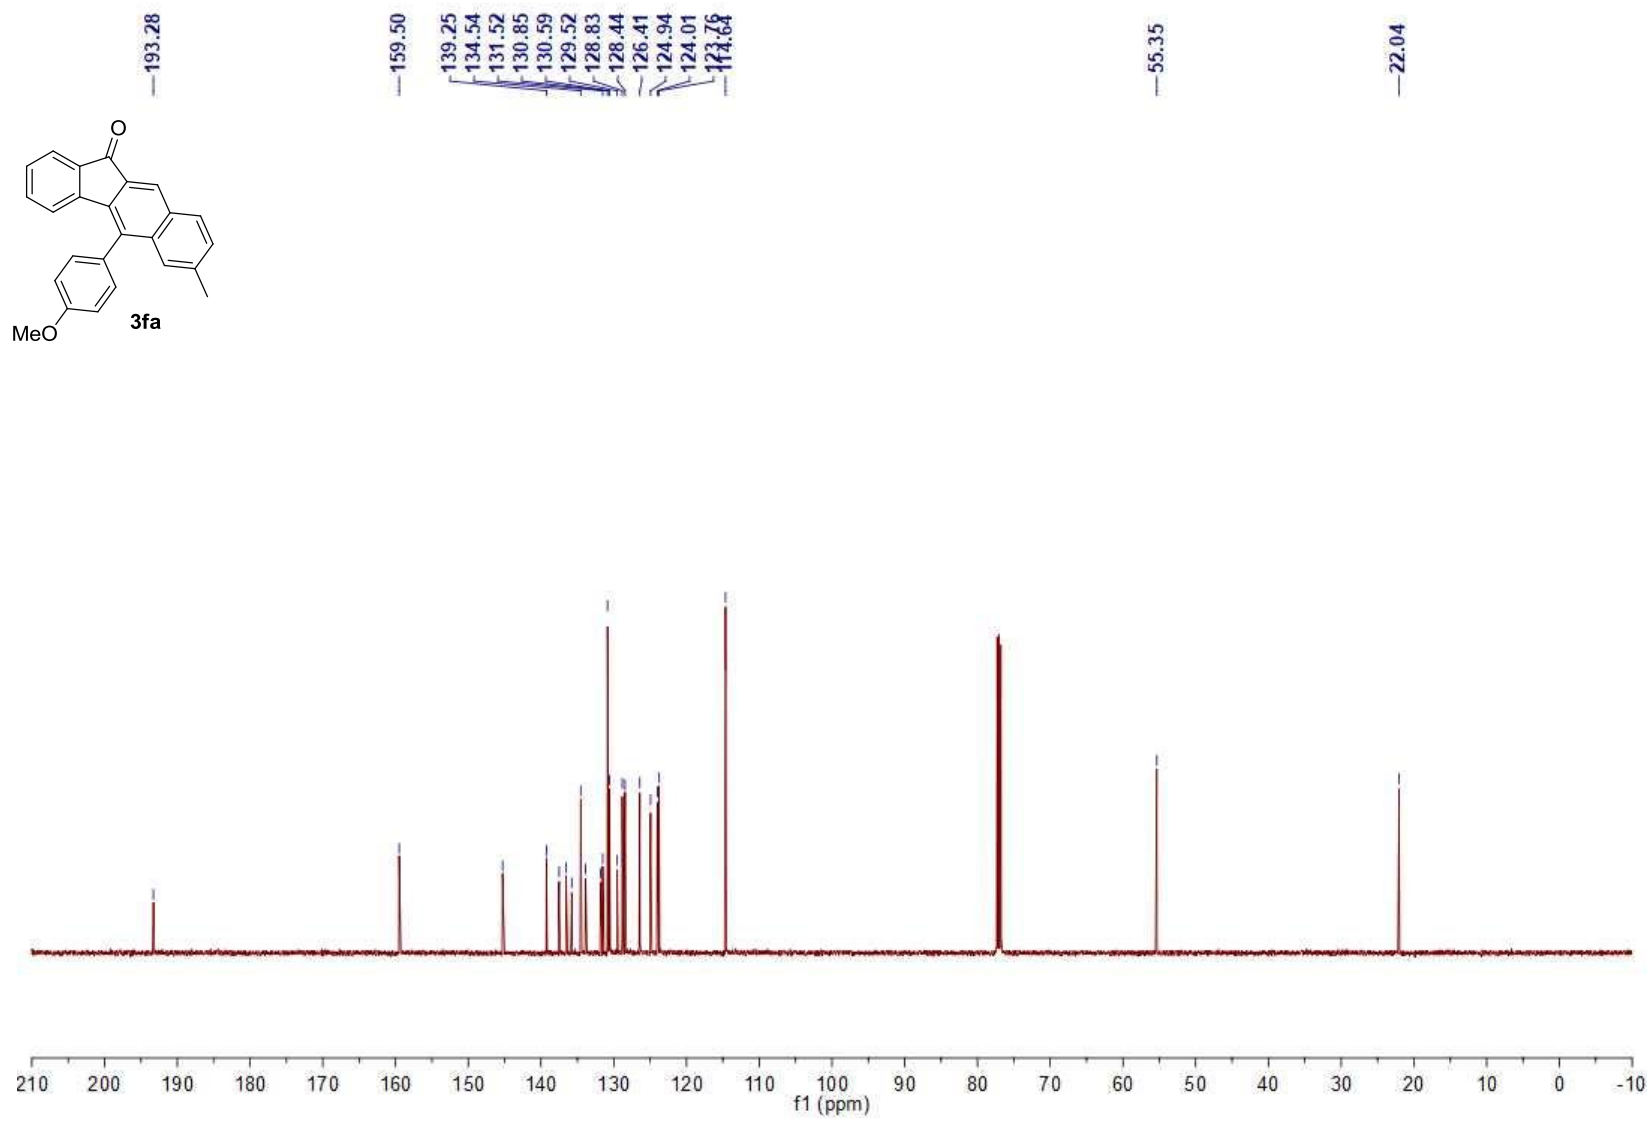

200513  
LQ-R2-2-Br CDCL3 0513

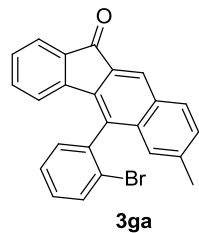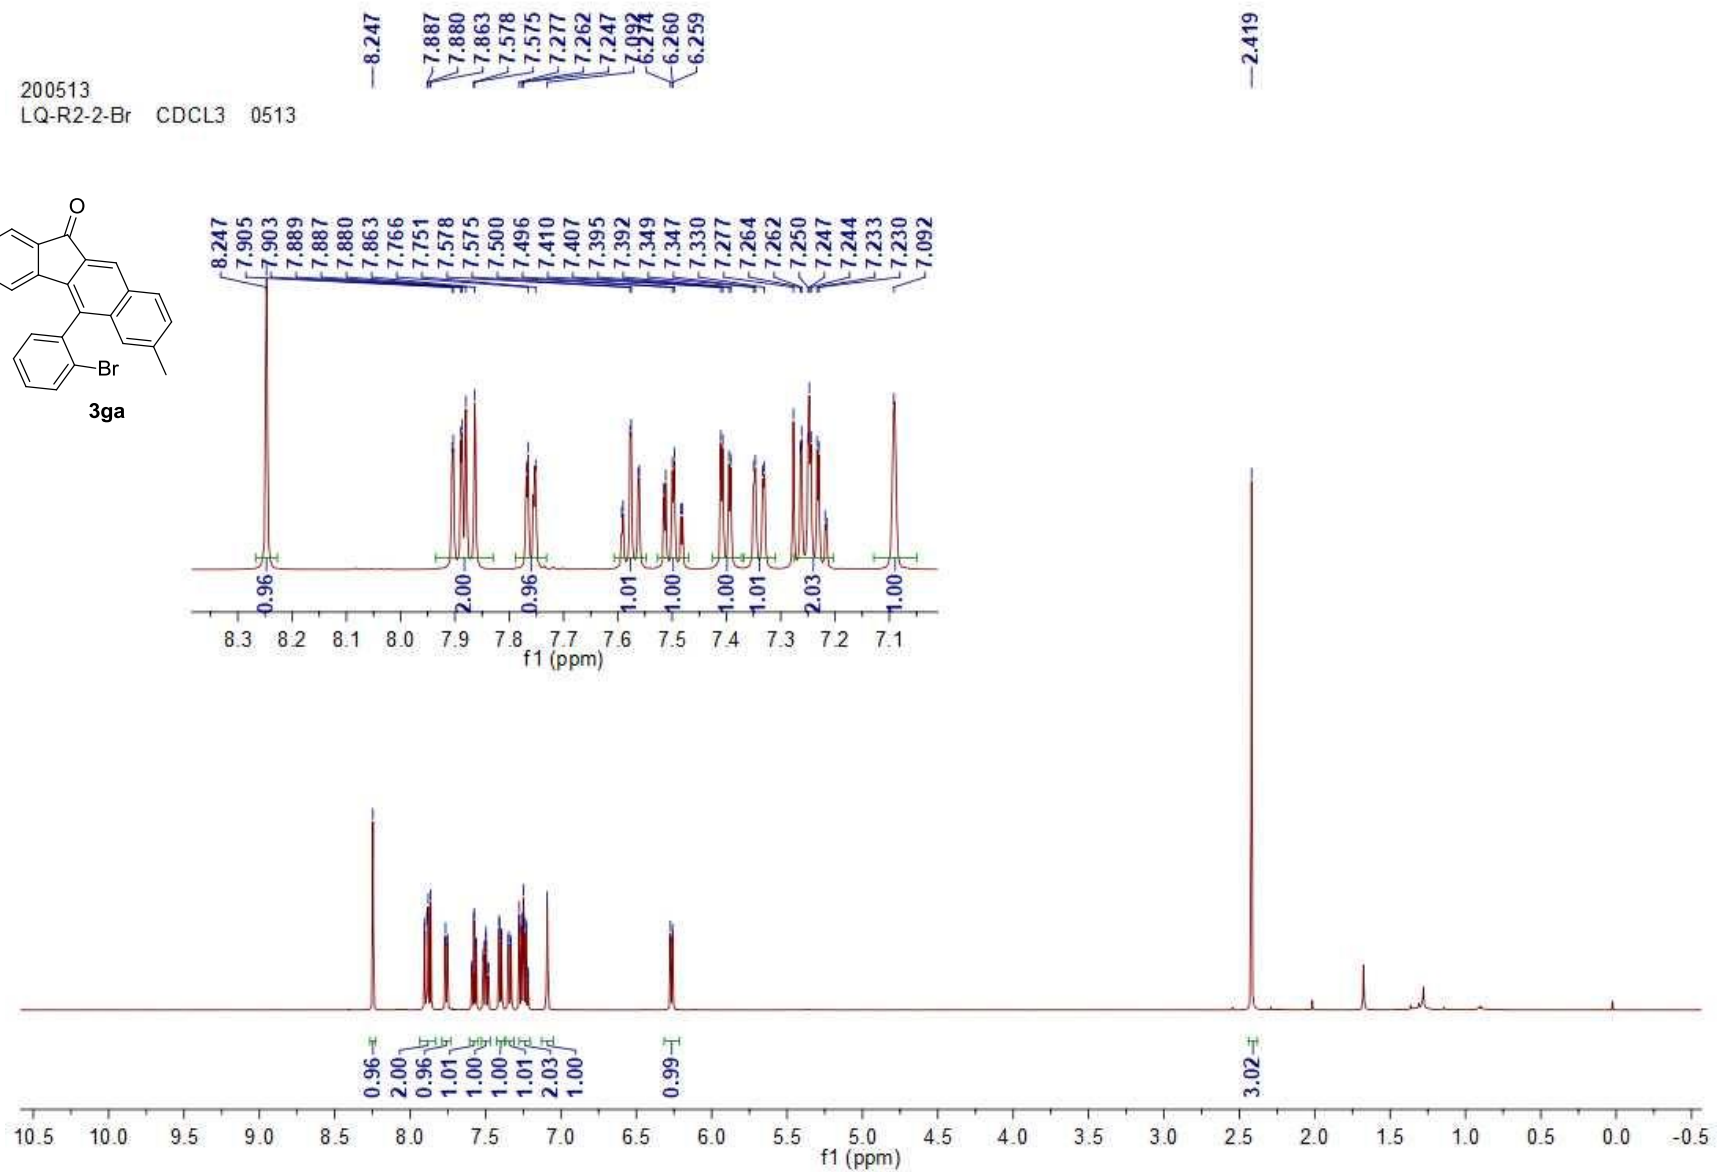

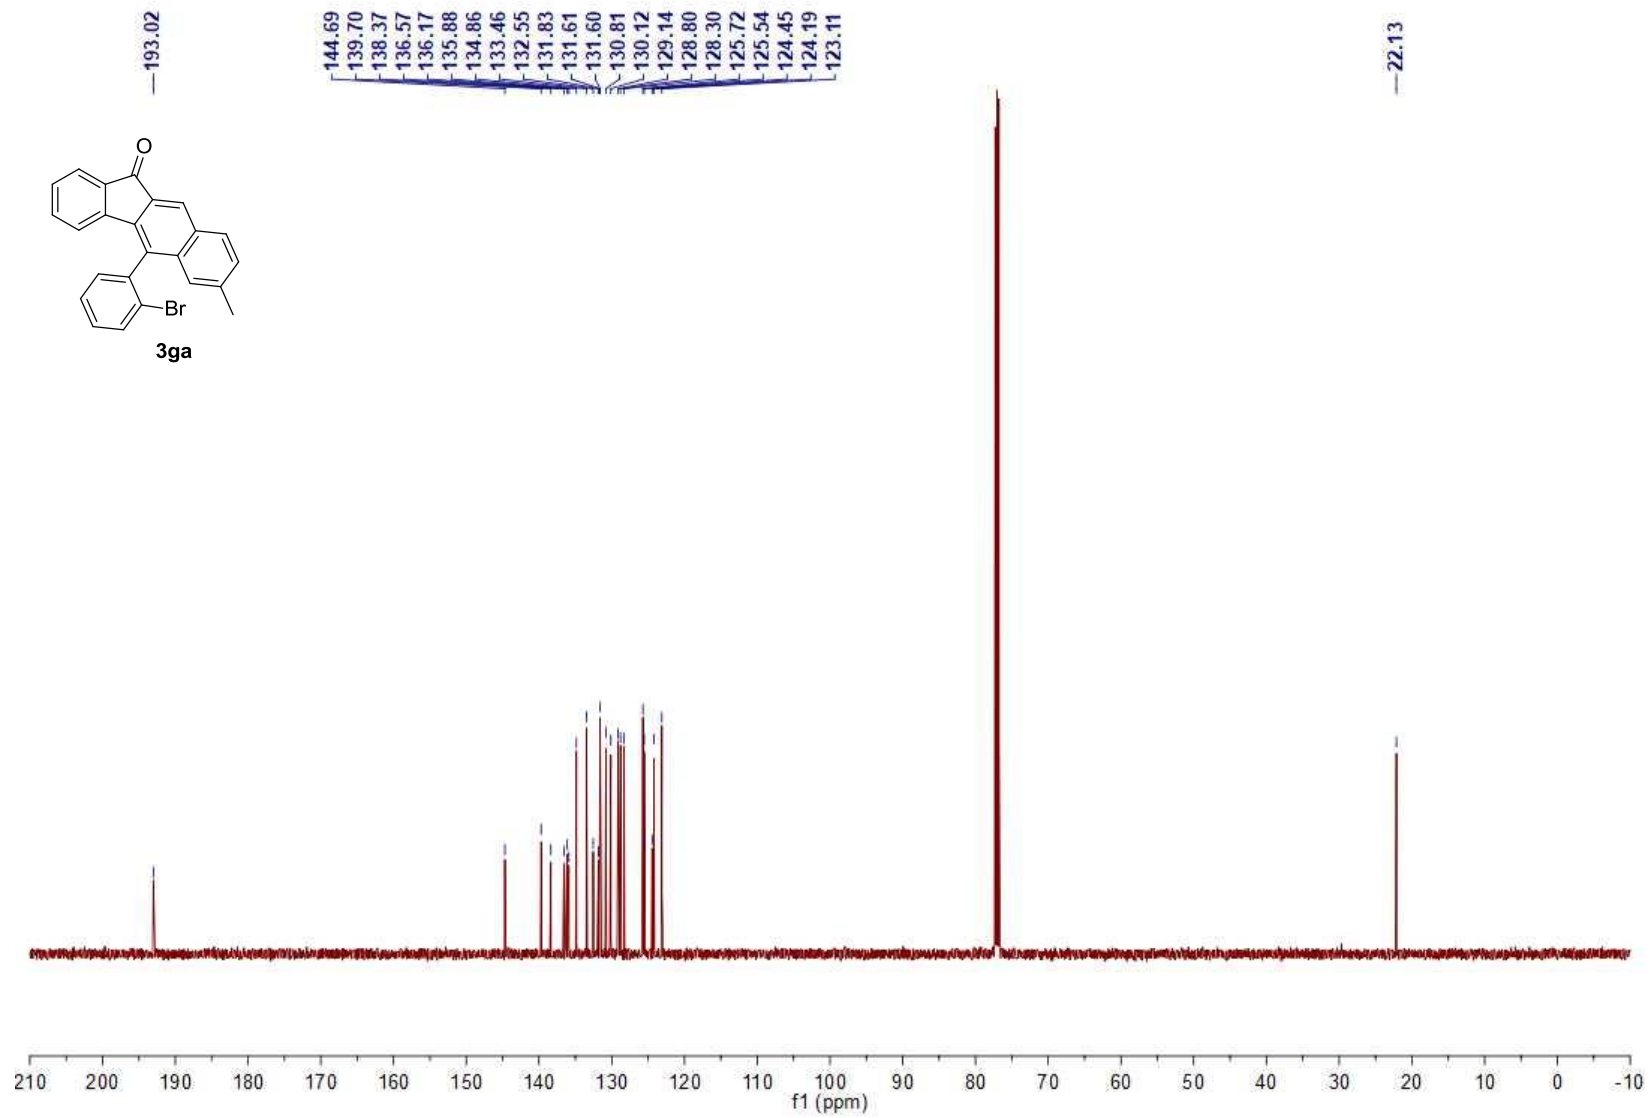

200513  
LQ-R2-2-Cl CDCL3 0513

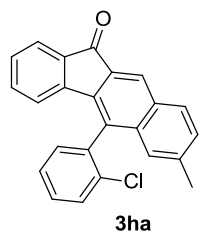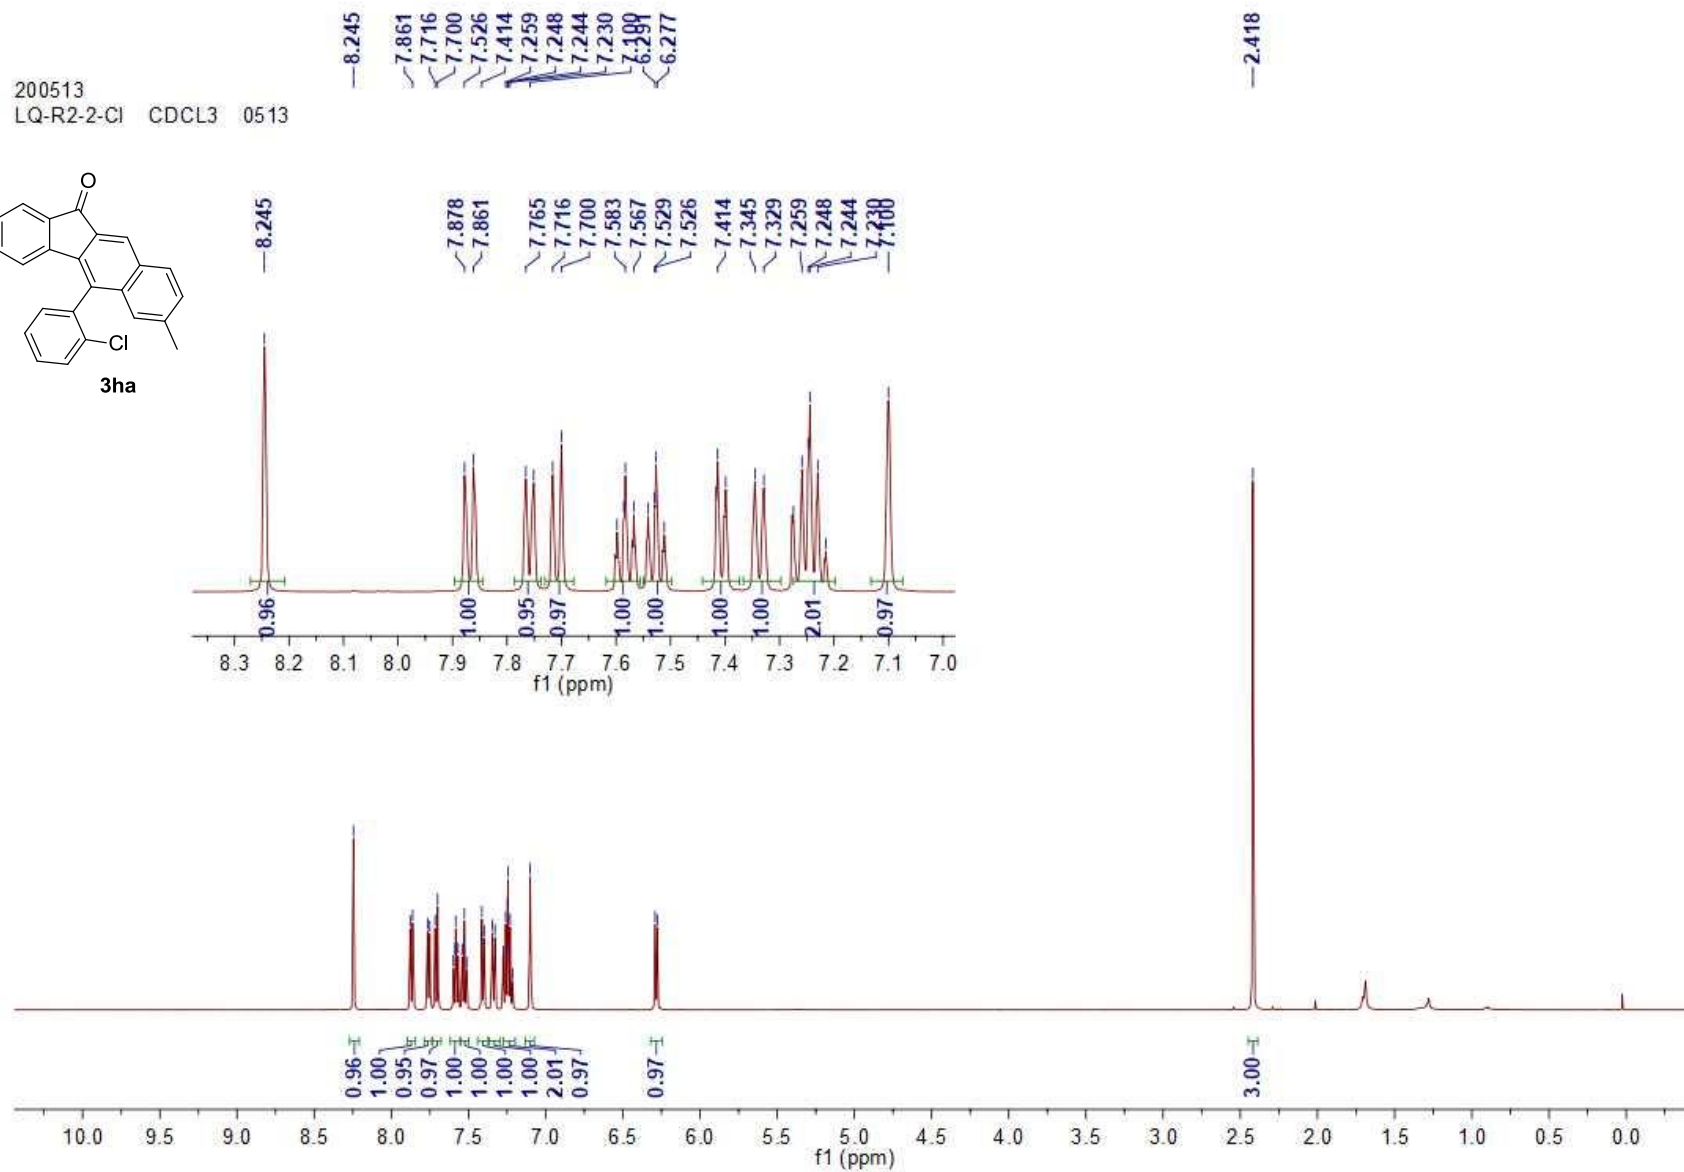

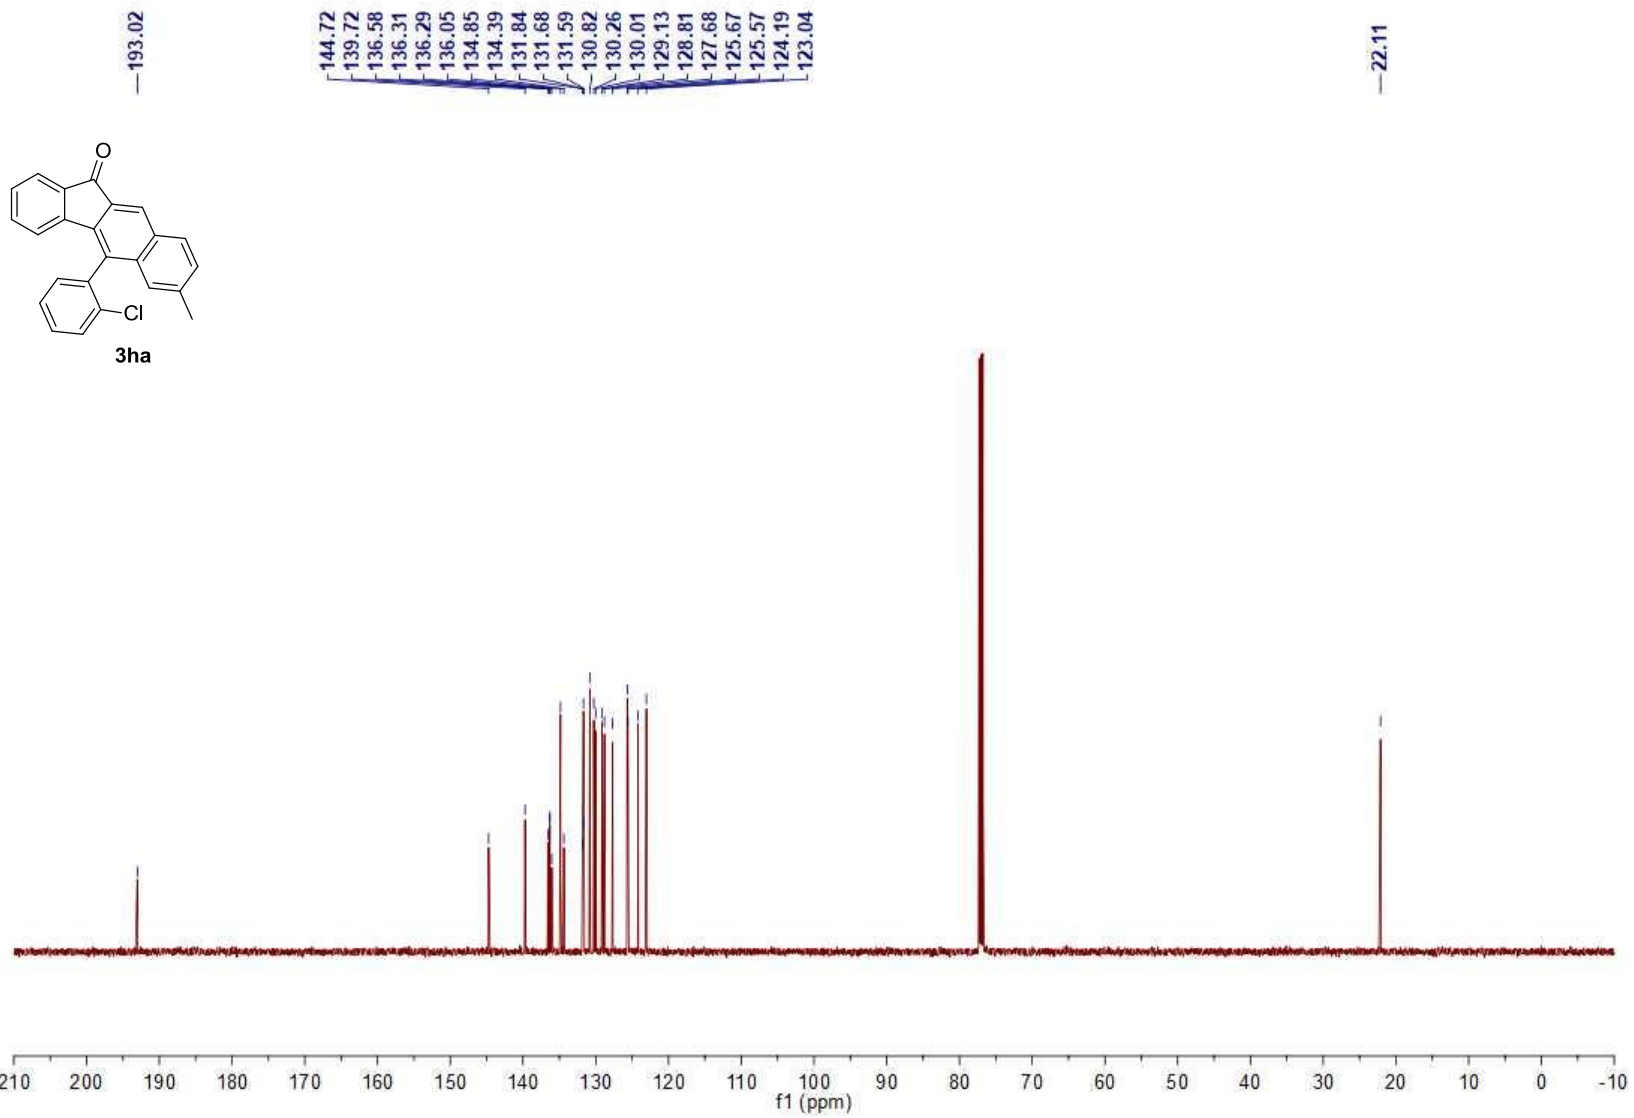

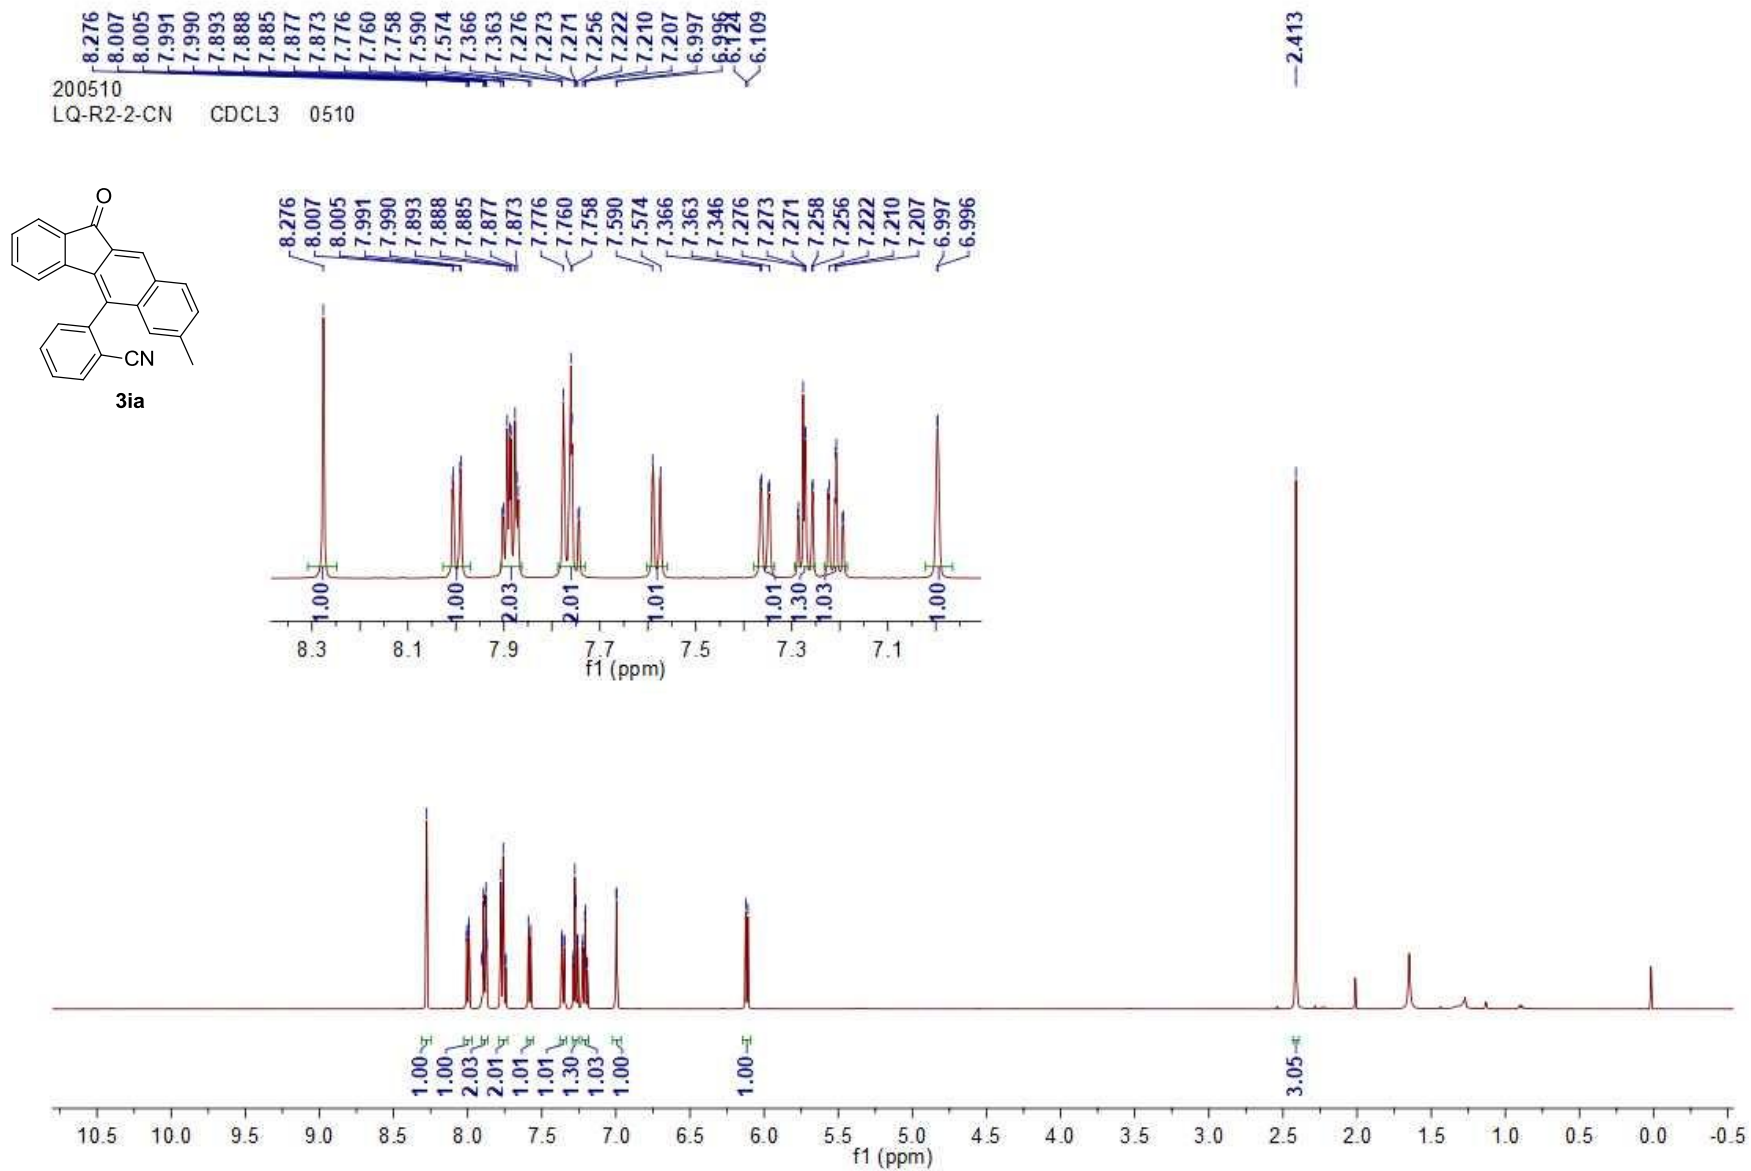



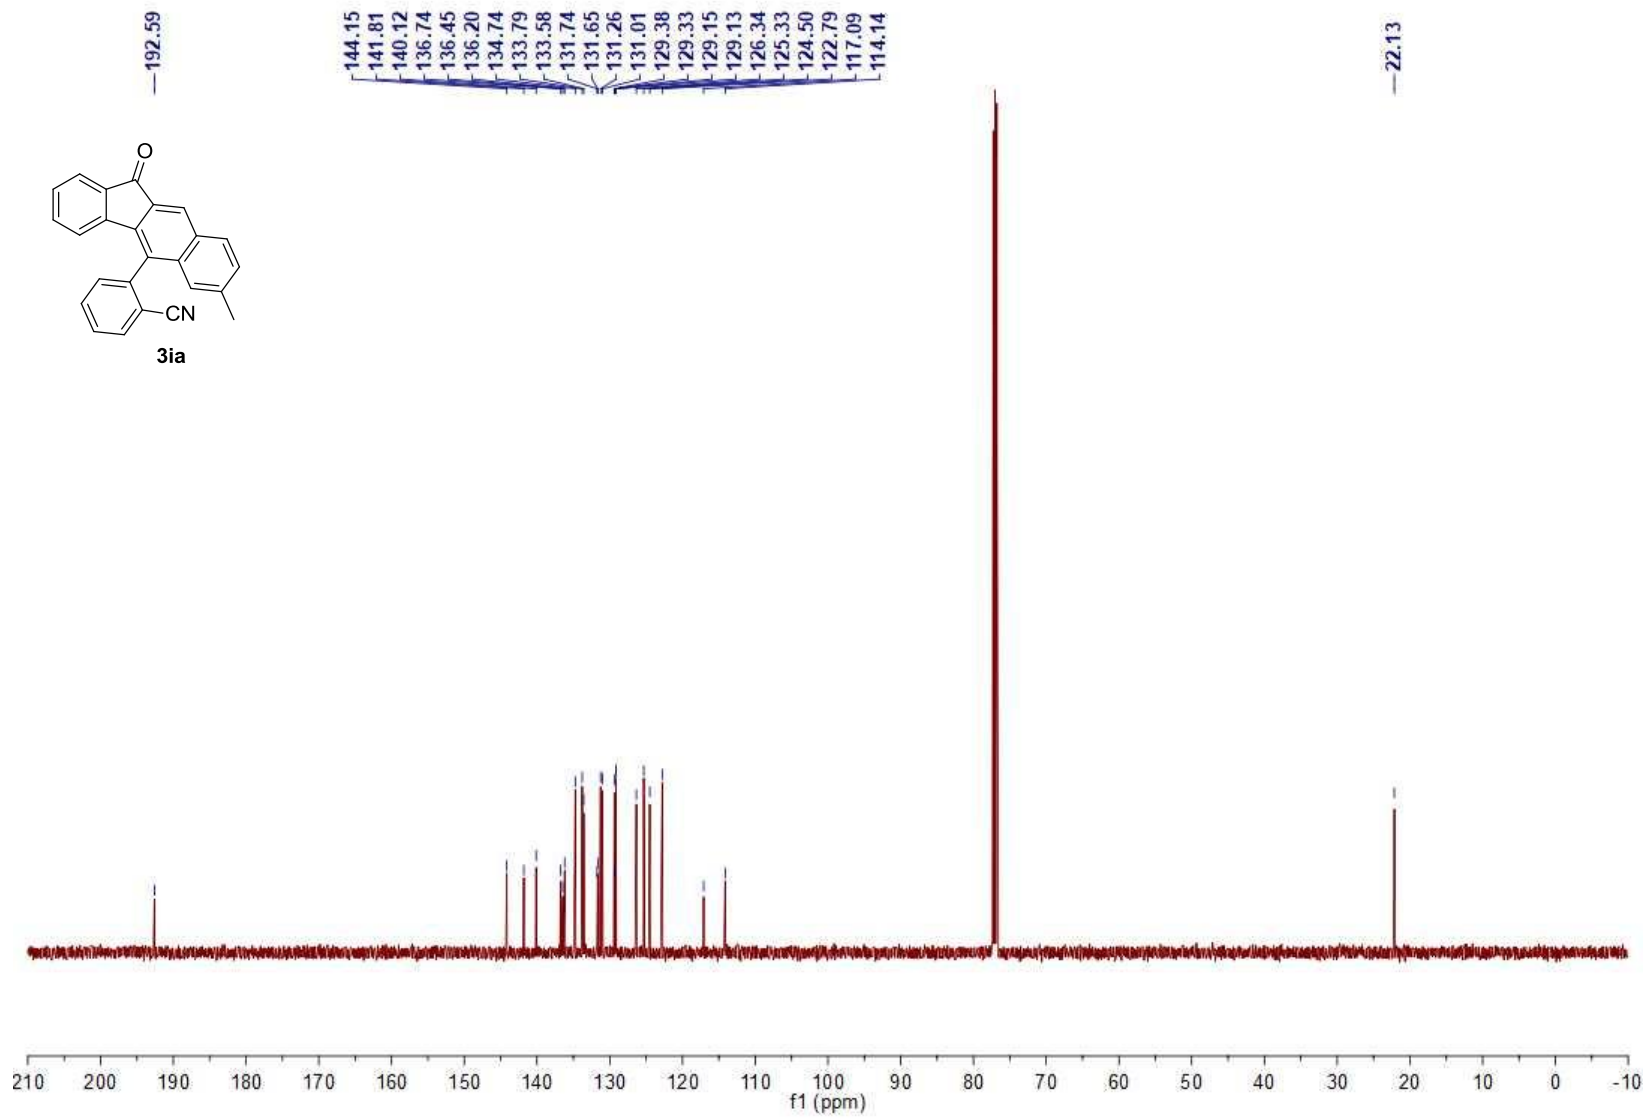

200510  
LQ-R2-4-Br CDCL3 0510

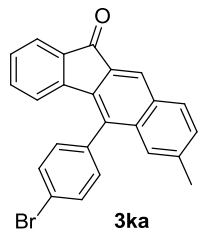

8.187  
7.825  
7.781  
7.764  
7.311  
7.295  
7.257  
6.389  
6.395  
6.382

2.412

8.187  
7.842  
7.825  
7.781  
7.764  
7.744  
7.737  
7.731  
7.726  
7.329  
7.311  
7.295  
7.276  
7.257  
7.252  
7.247  
7.244  
7.240  
7.155

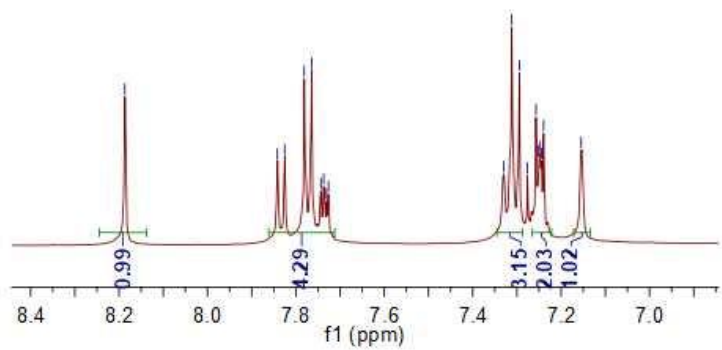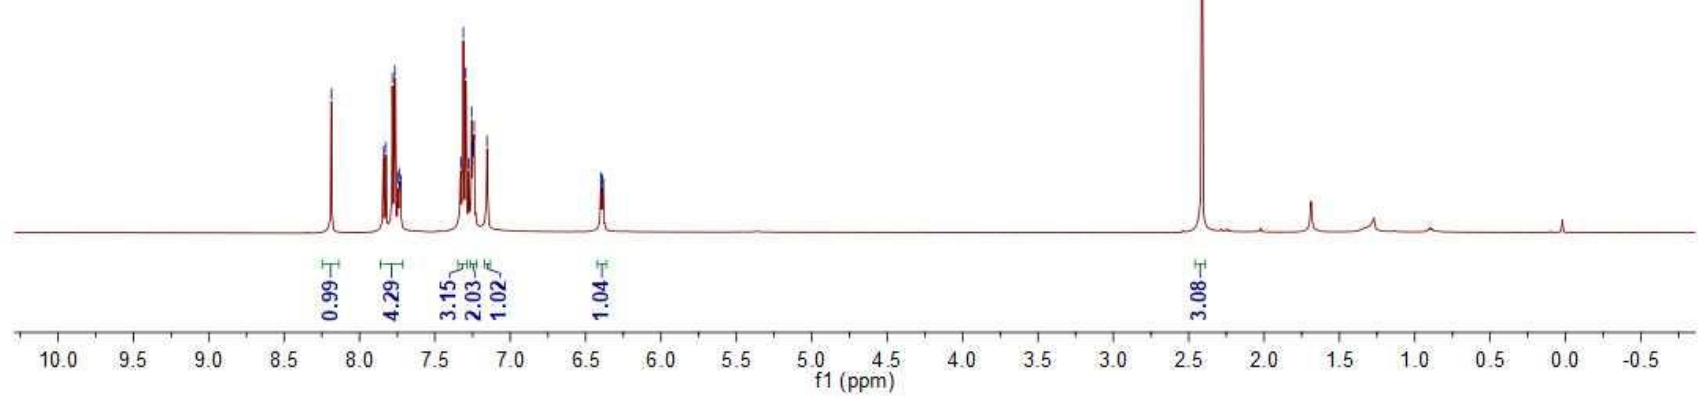

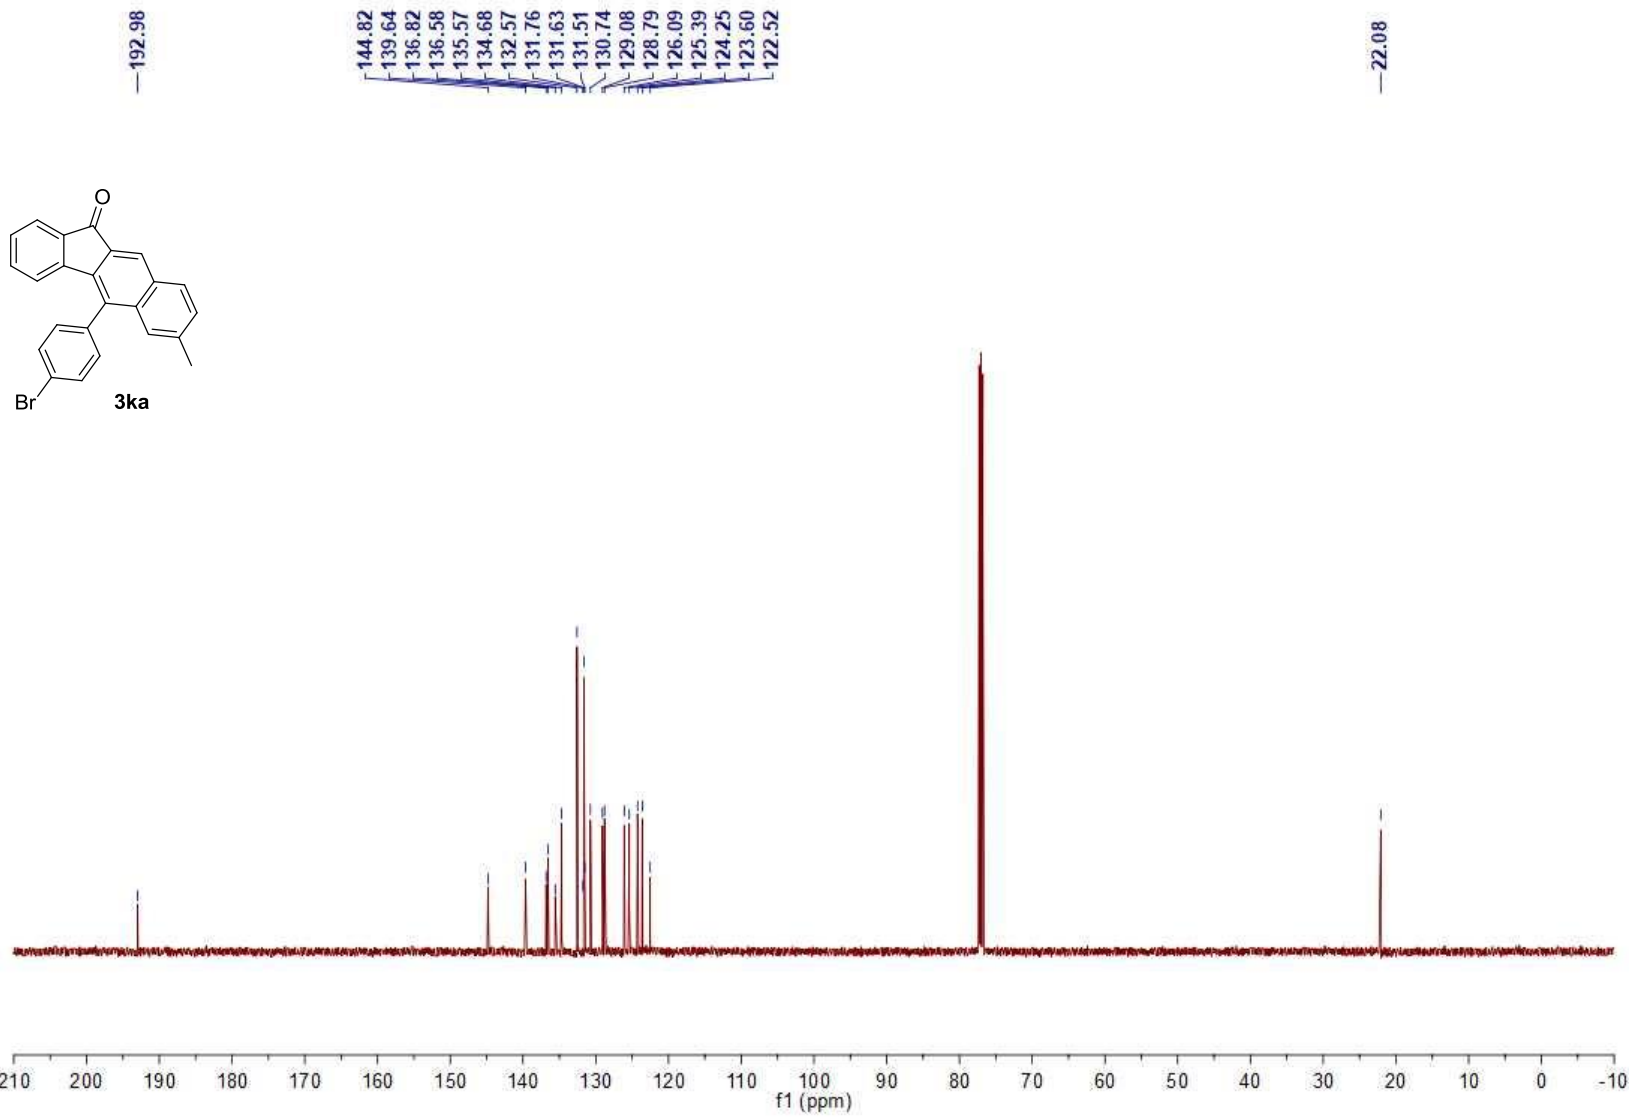

200116  
LQ-R2-4-F CDC13 0116

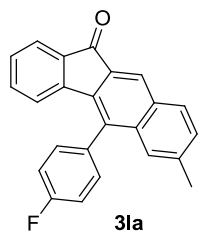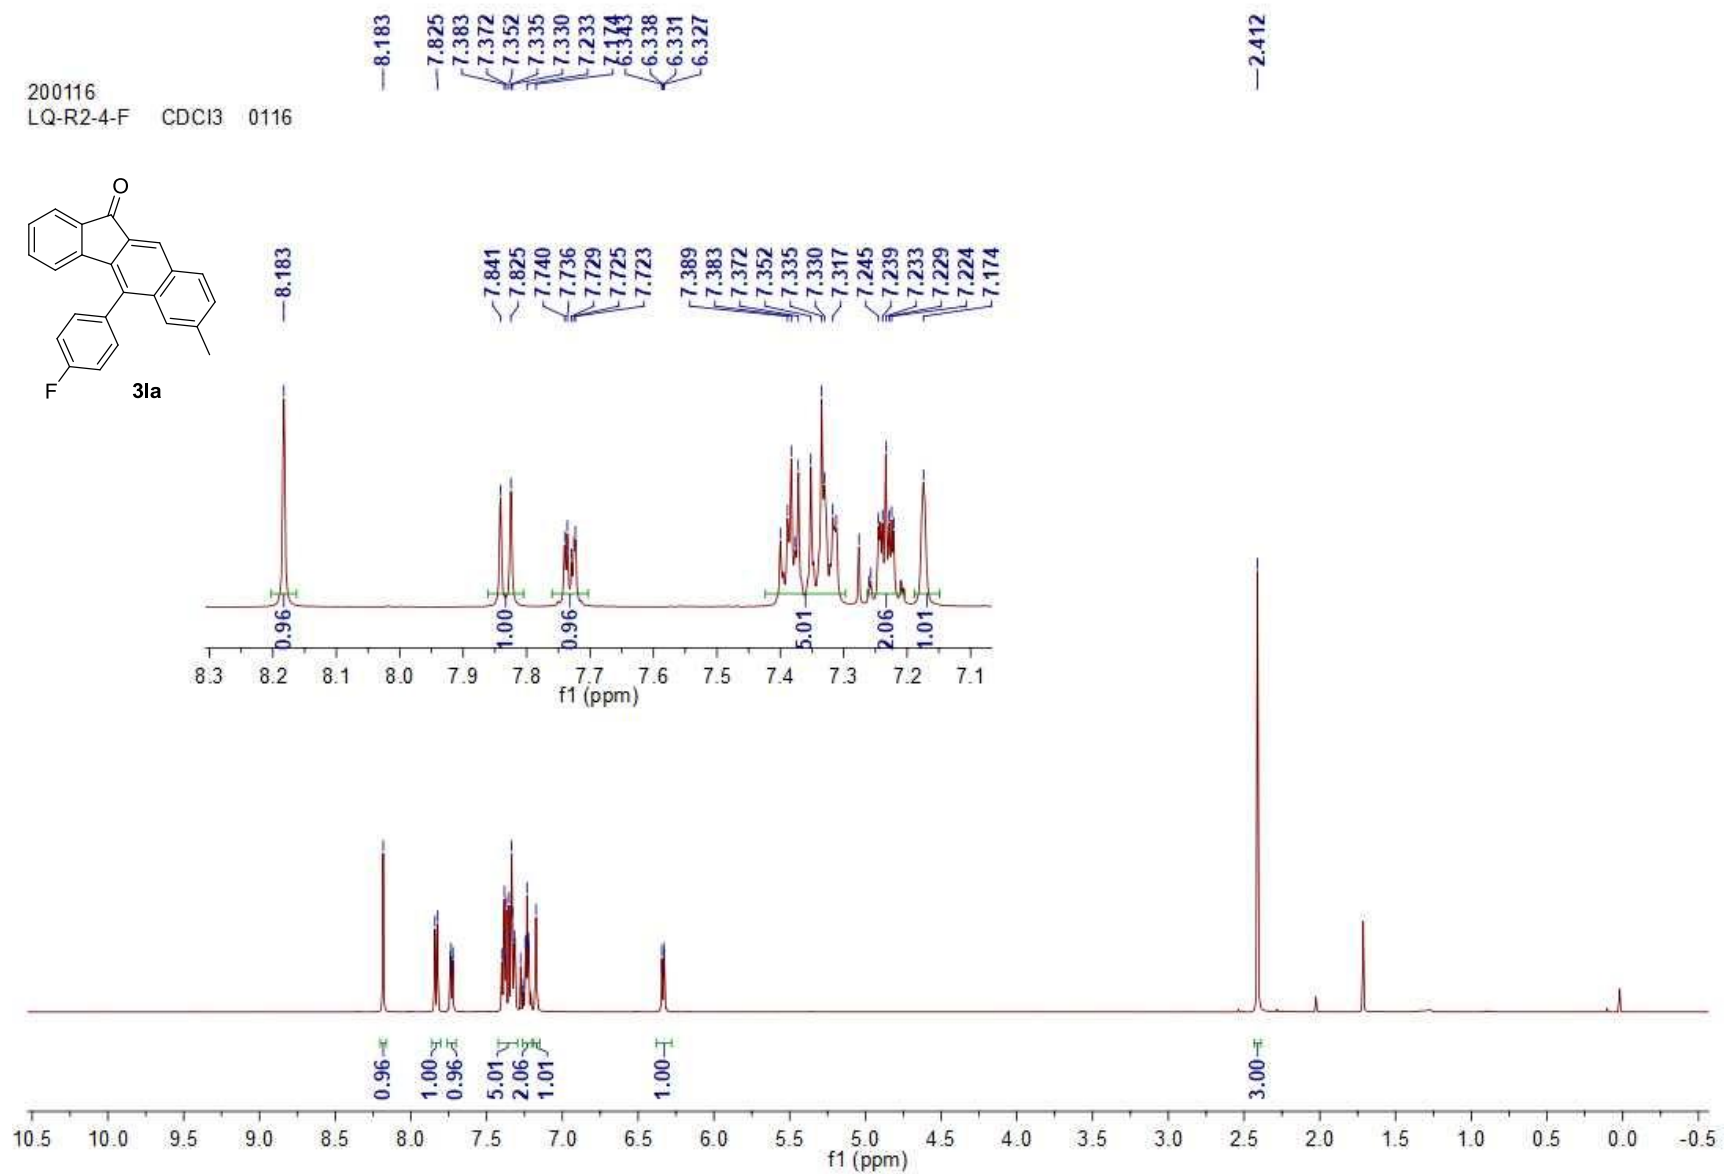

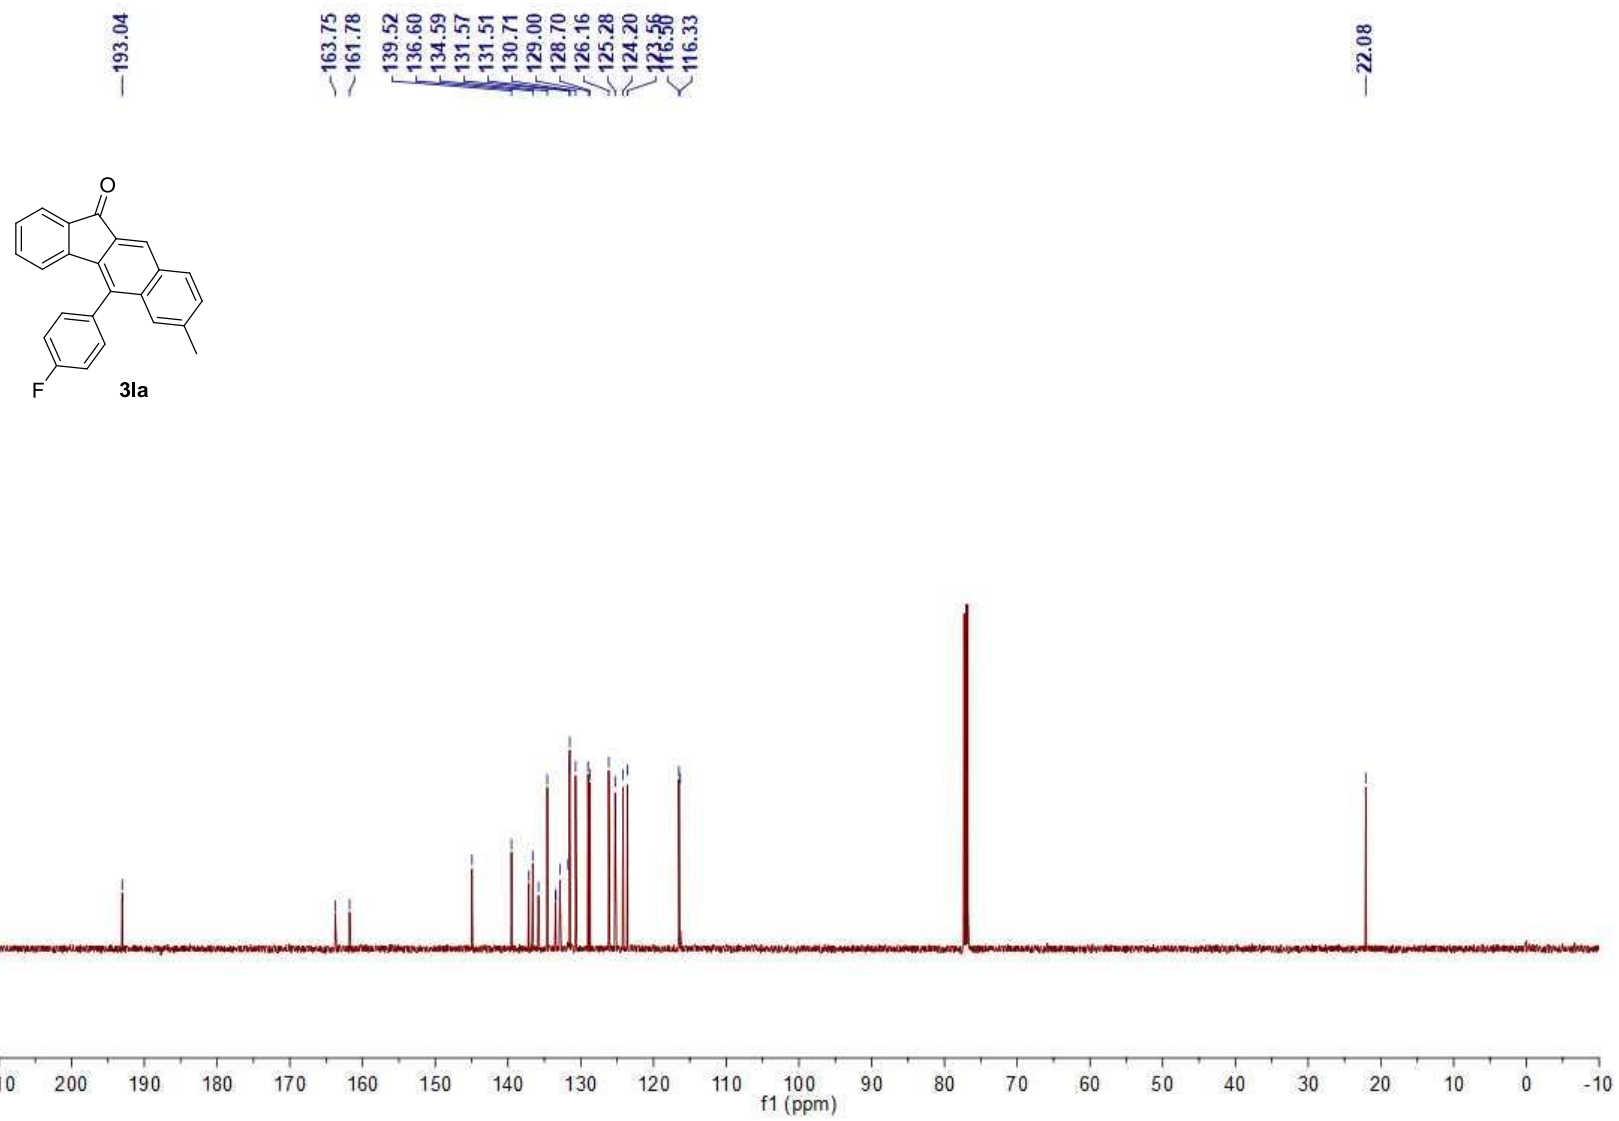

200513  
LQ-R2-4-CF3 CDCL3 0513

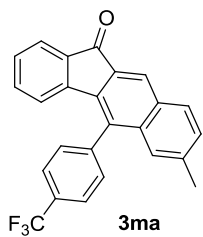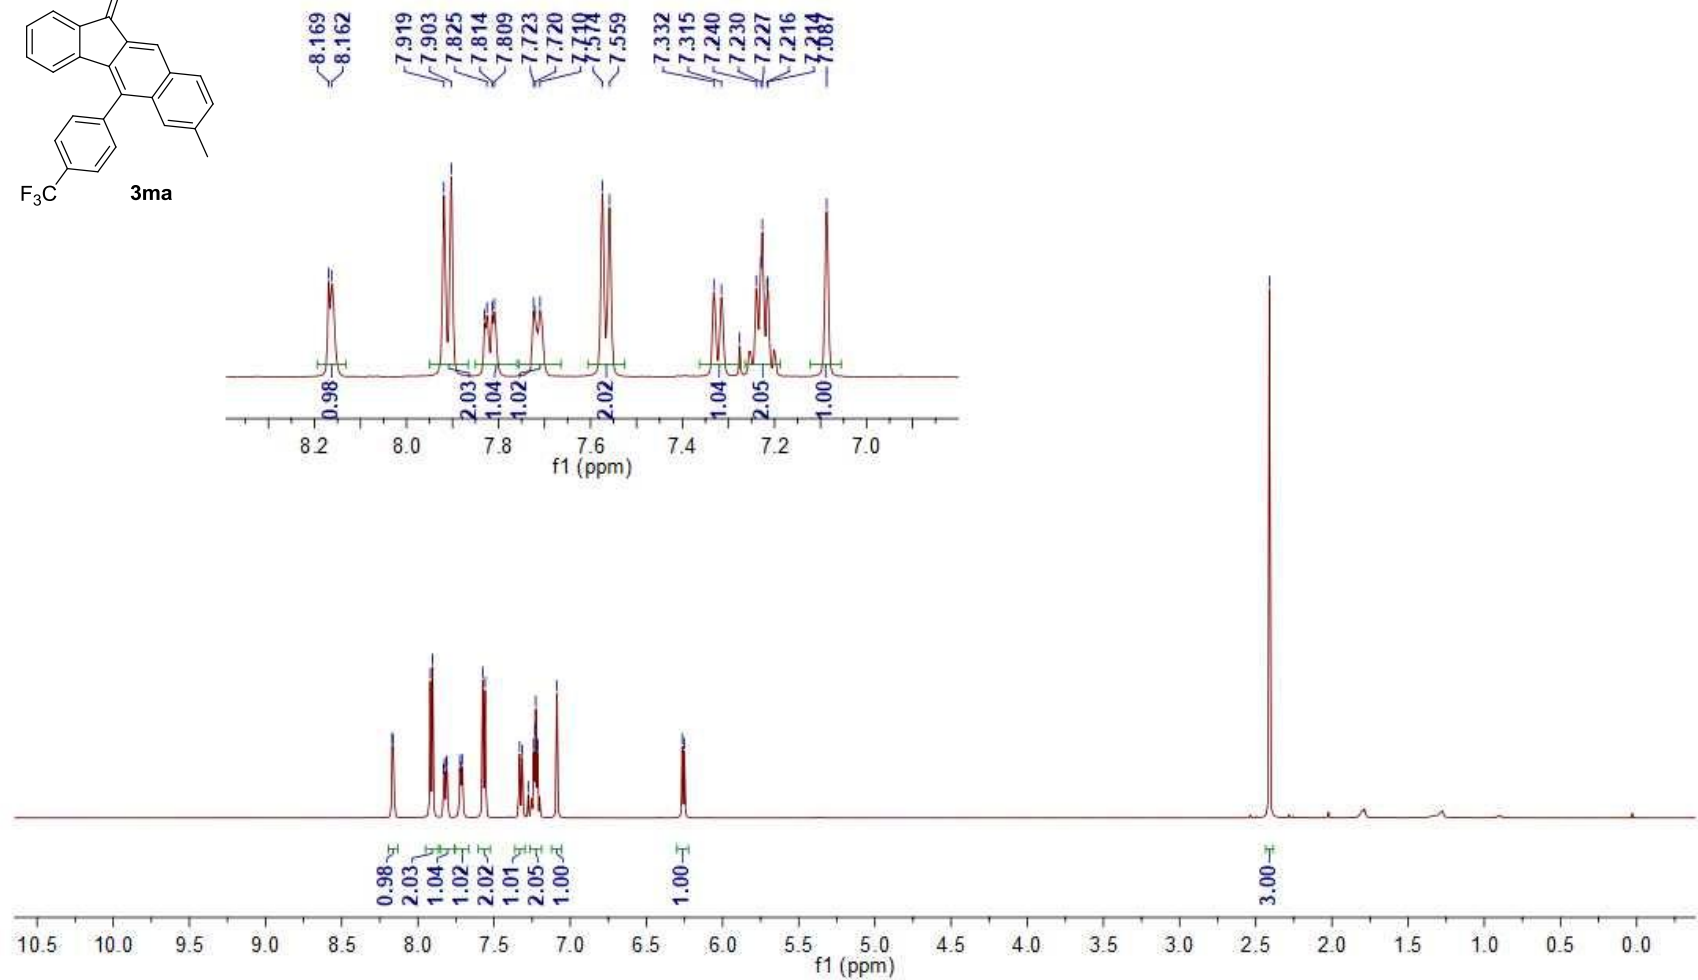

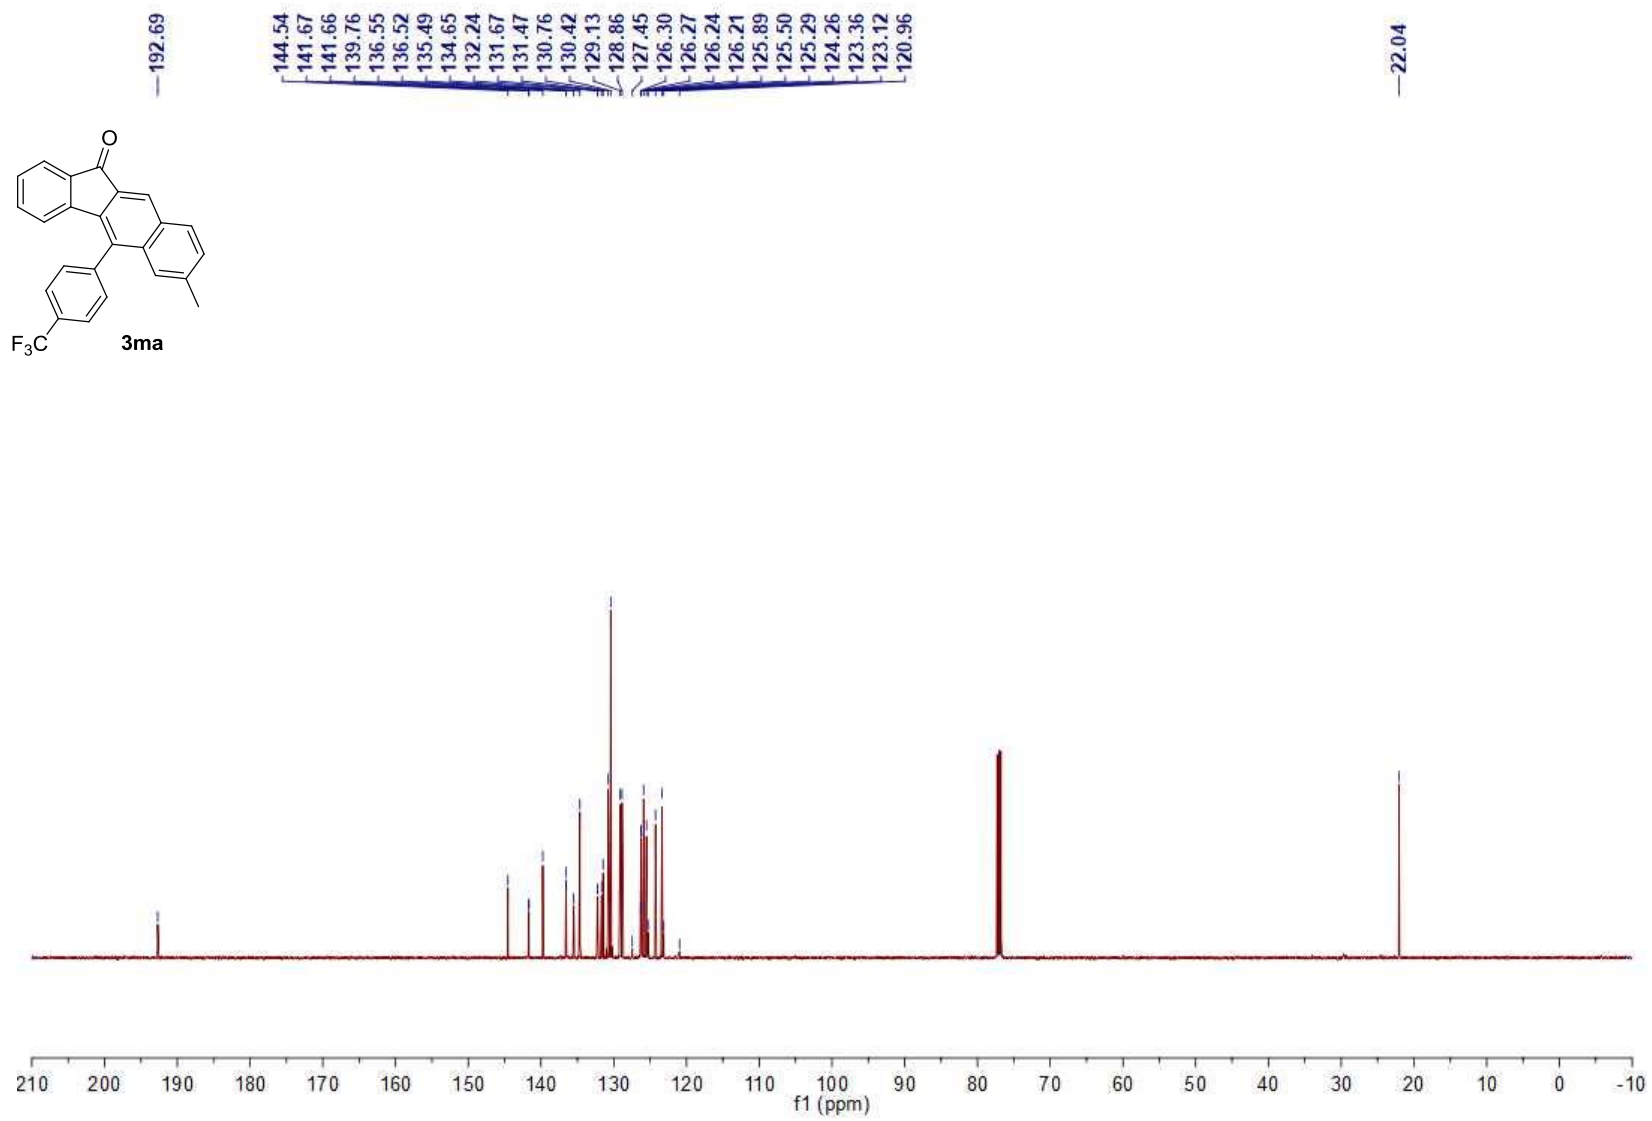

8.29  
8.11  
8.09  
8.01  
7.90  
7.87  
7.70  
7.70  
7.70  
7.69  
7.68  
7.52  
7.50  
7.50  
7.40  
7.31  
7.29  
7.29  
7.25  
7.12  
7.12  
7.01  
7.01  
6.96  
5.81  
5.81

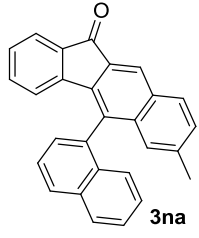

8.09  
7.90  
7.87  
7.70  
7.70  
7.70  
7.69  
7.52  
7.50  
7.50  
7.40  
7.31  
7.29  
7.29  
7.25  
7.12  
7.12  
7.01  
7.01  
6.96  
6.96

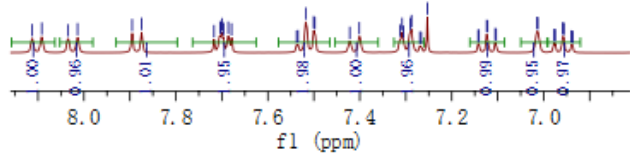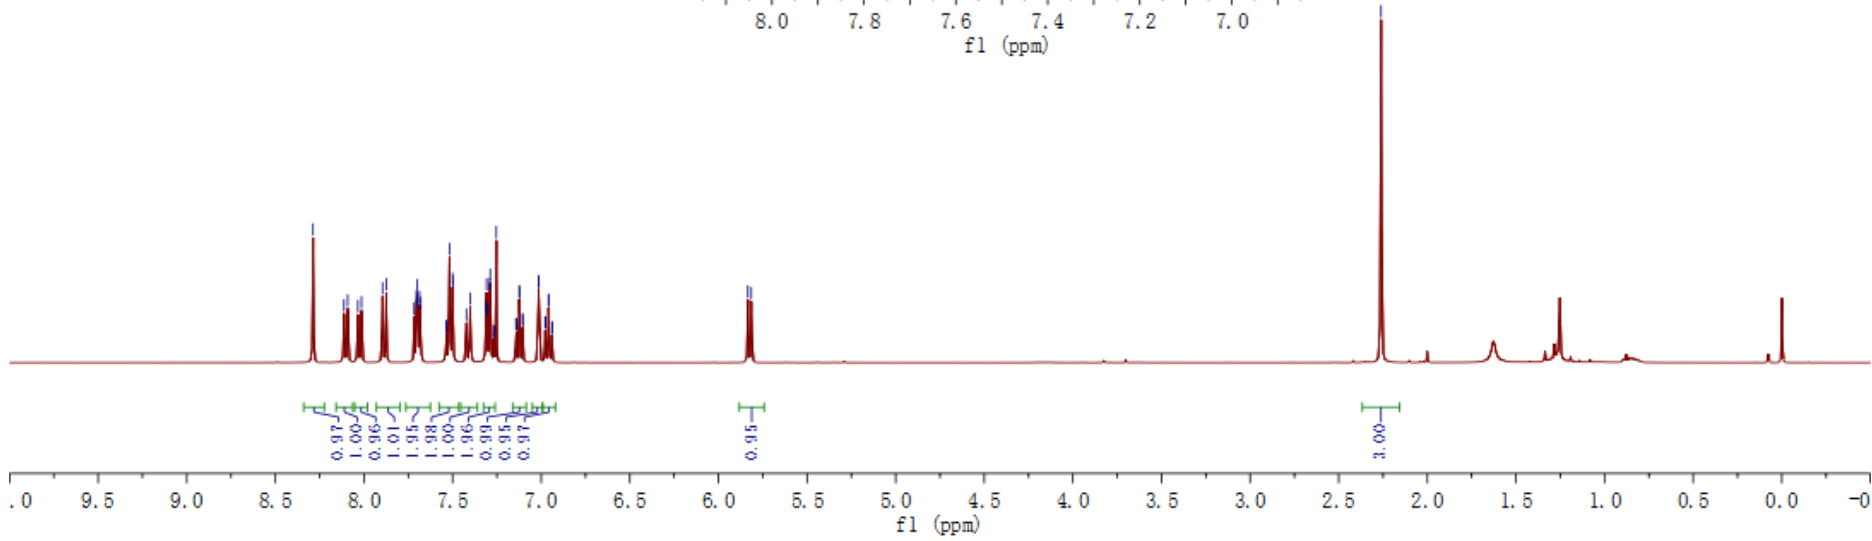

—2.26



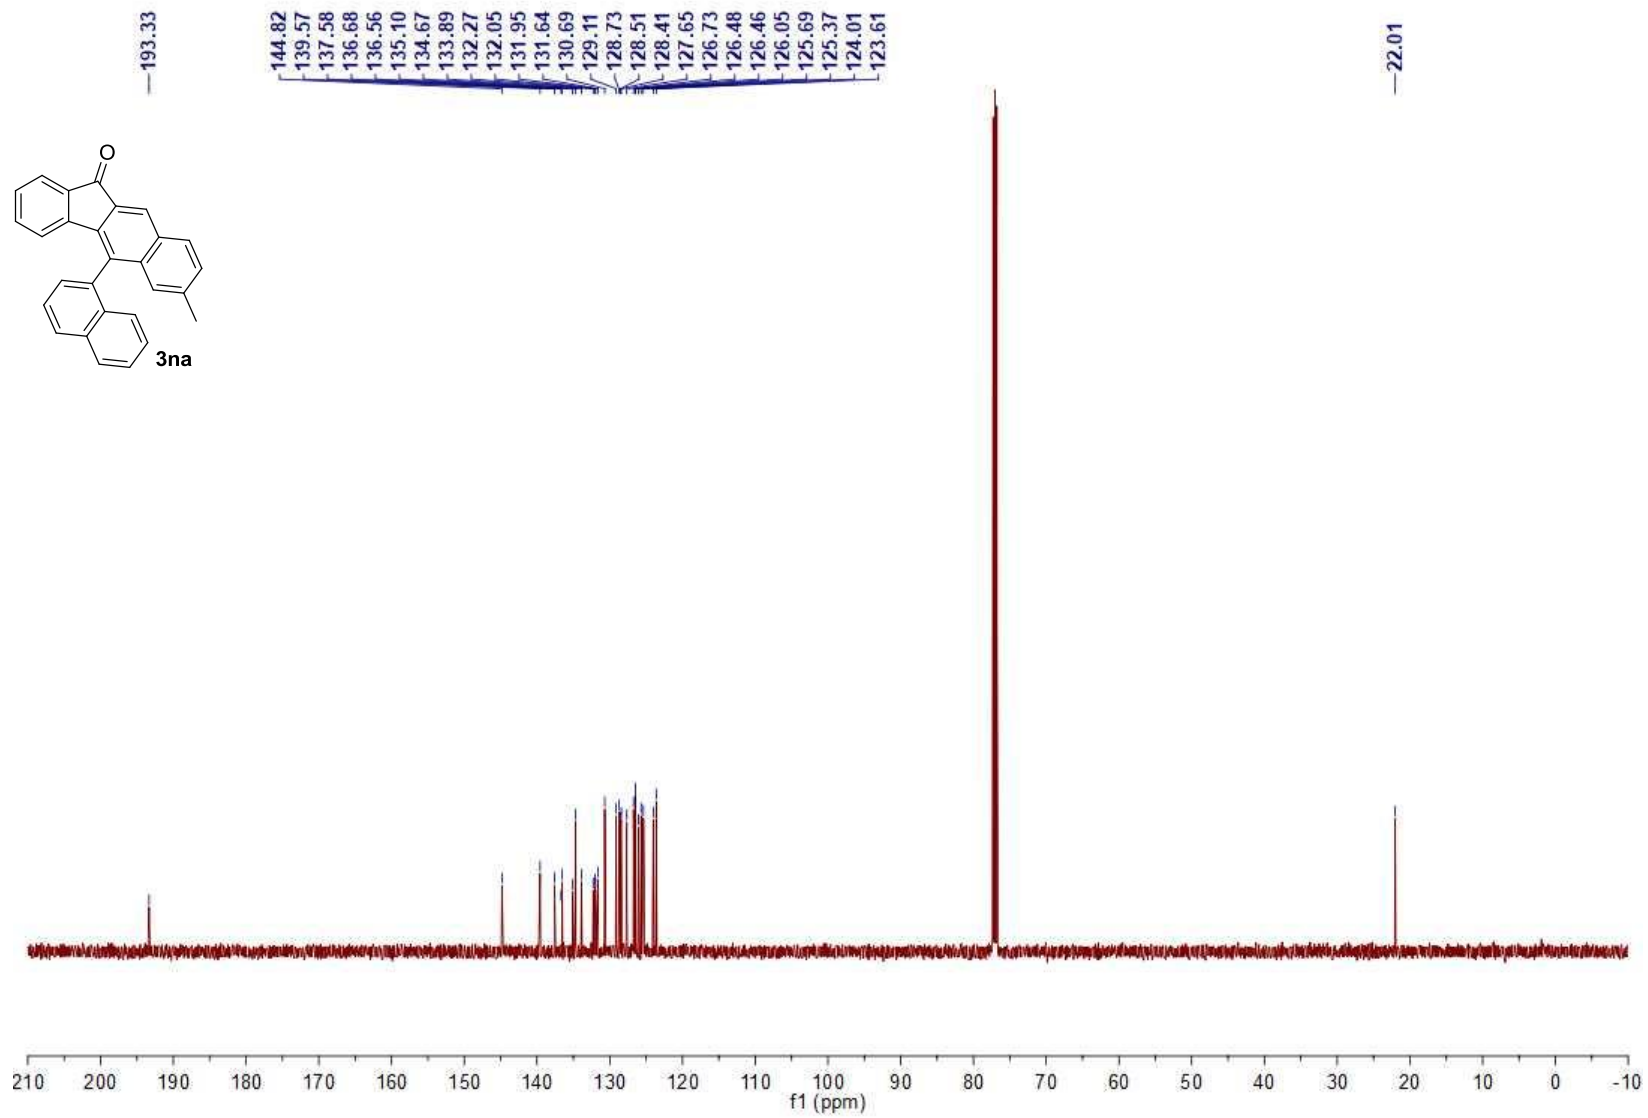

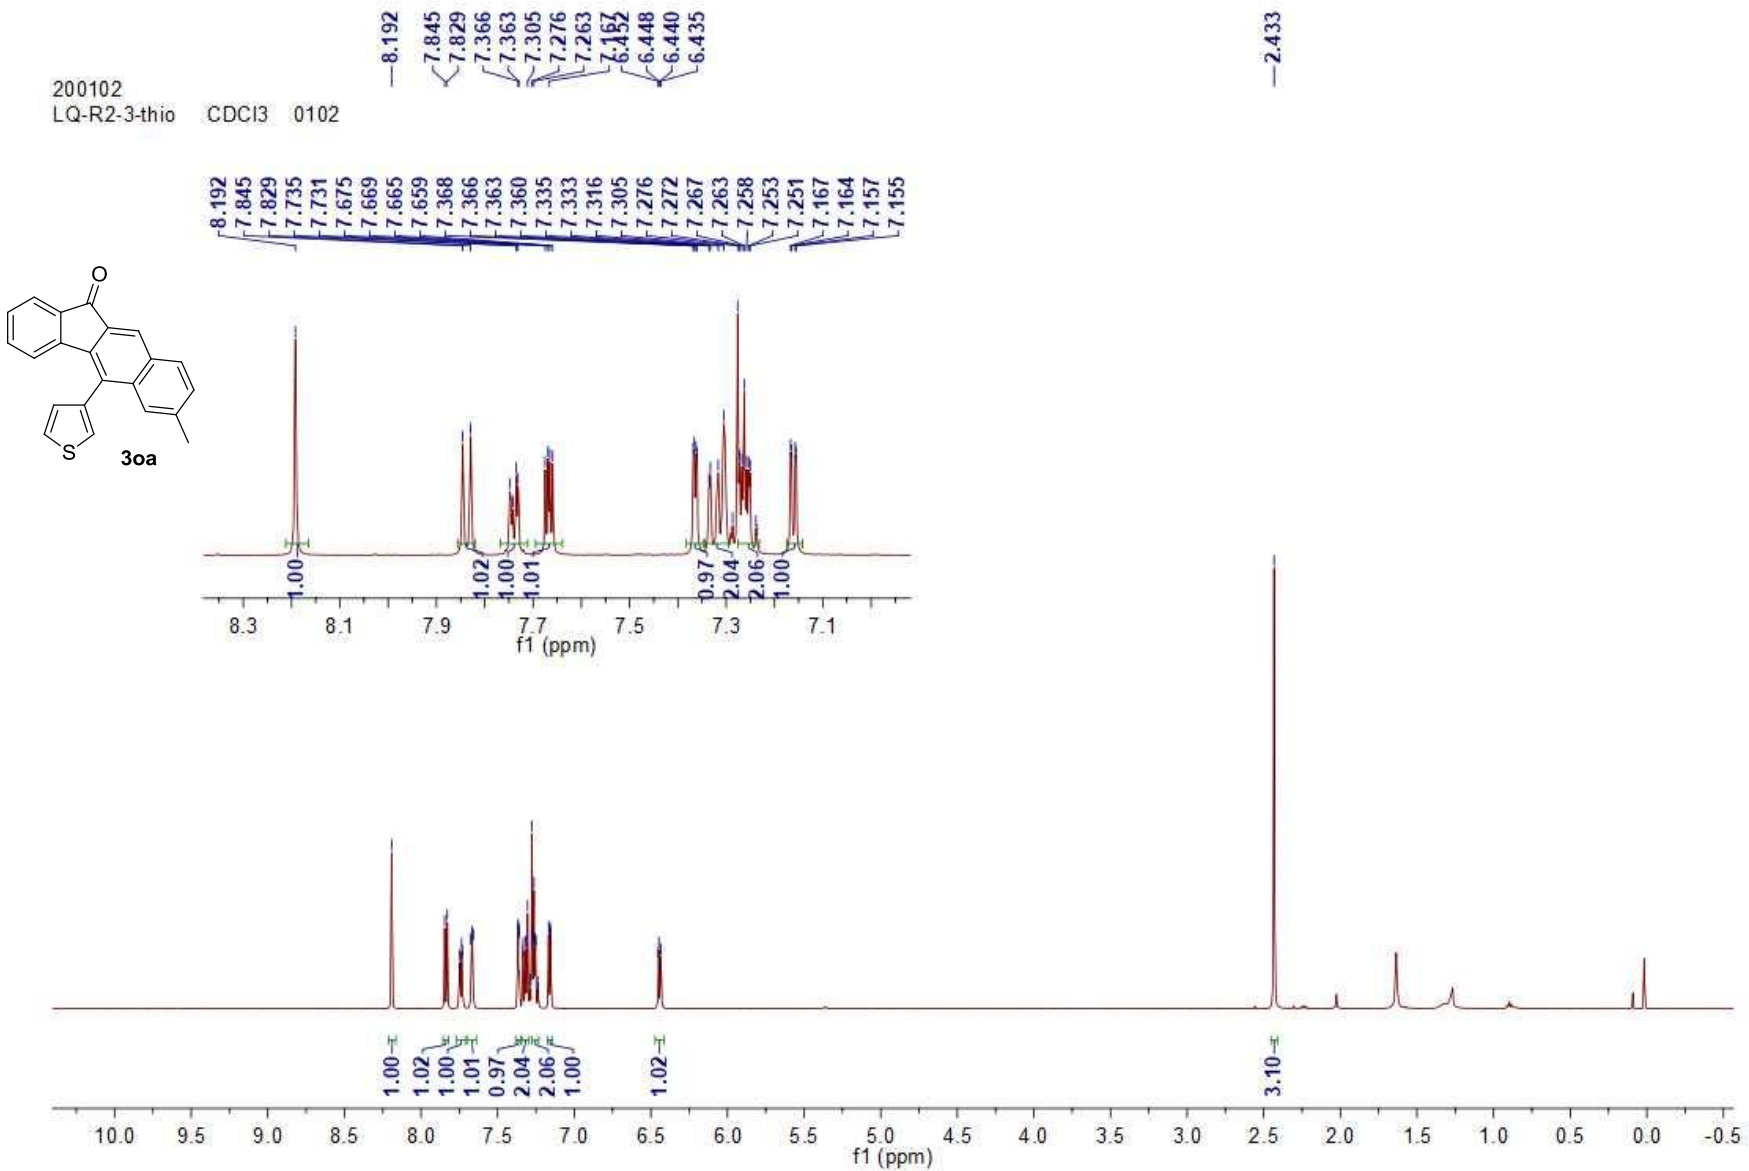

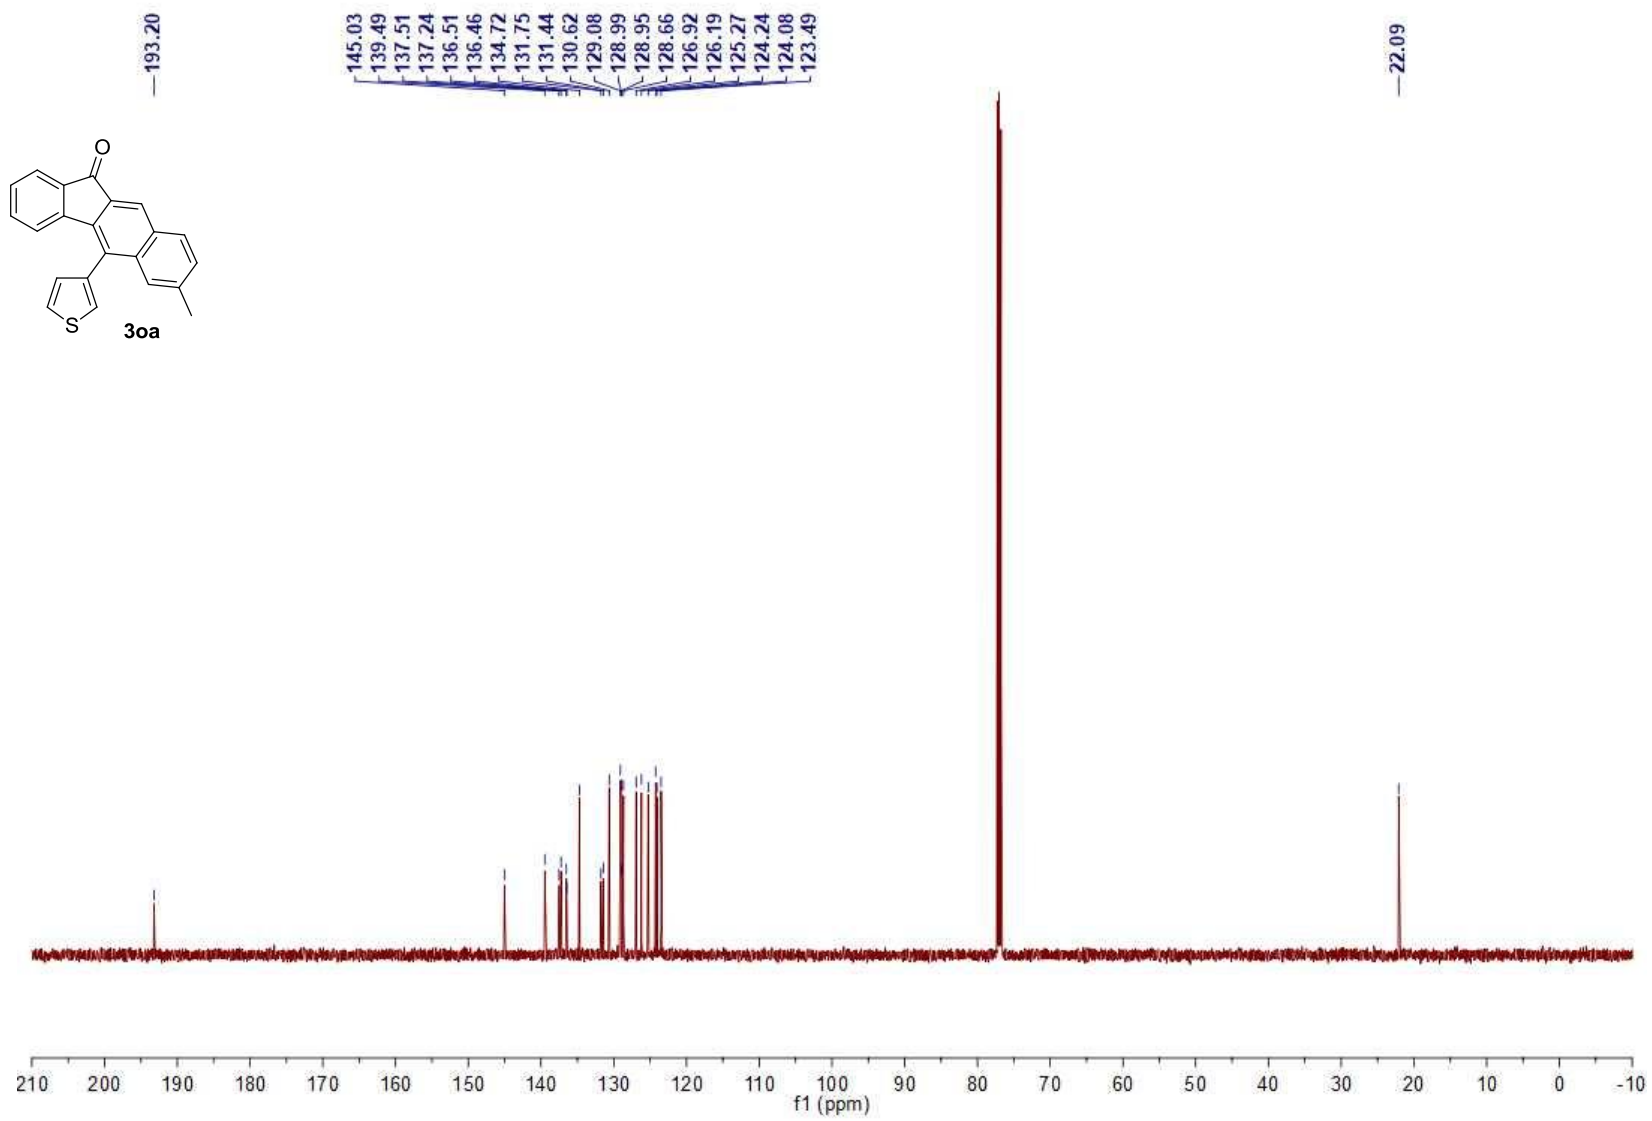

200510  
LQ-R1-3-CH3 CDCL3 0510

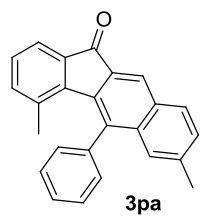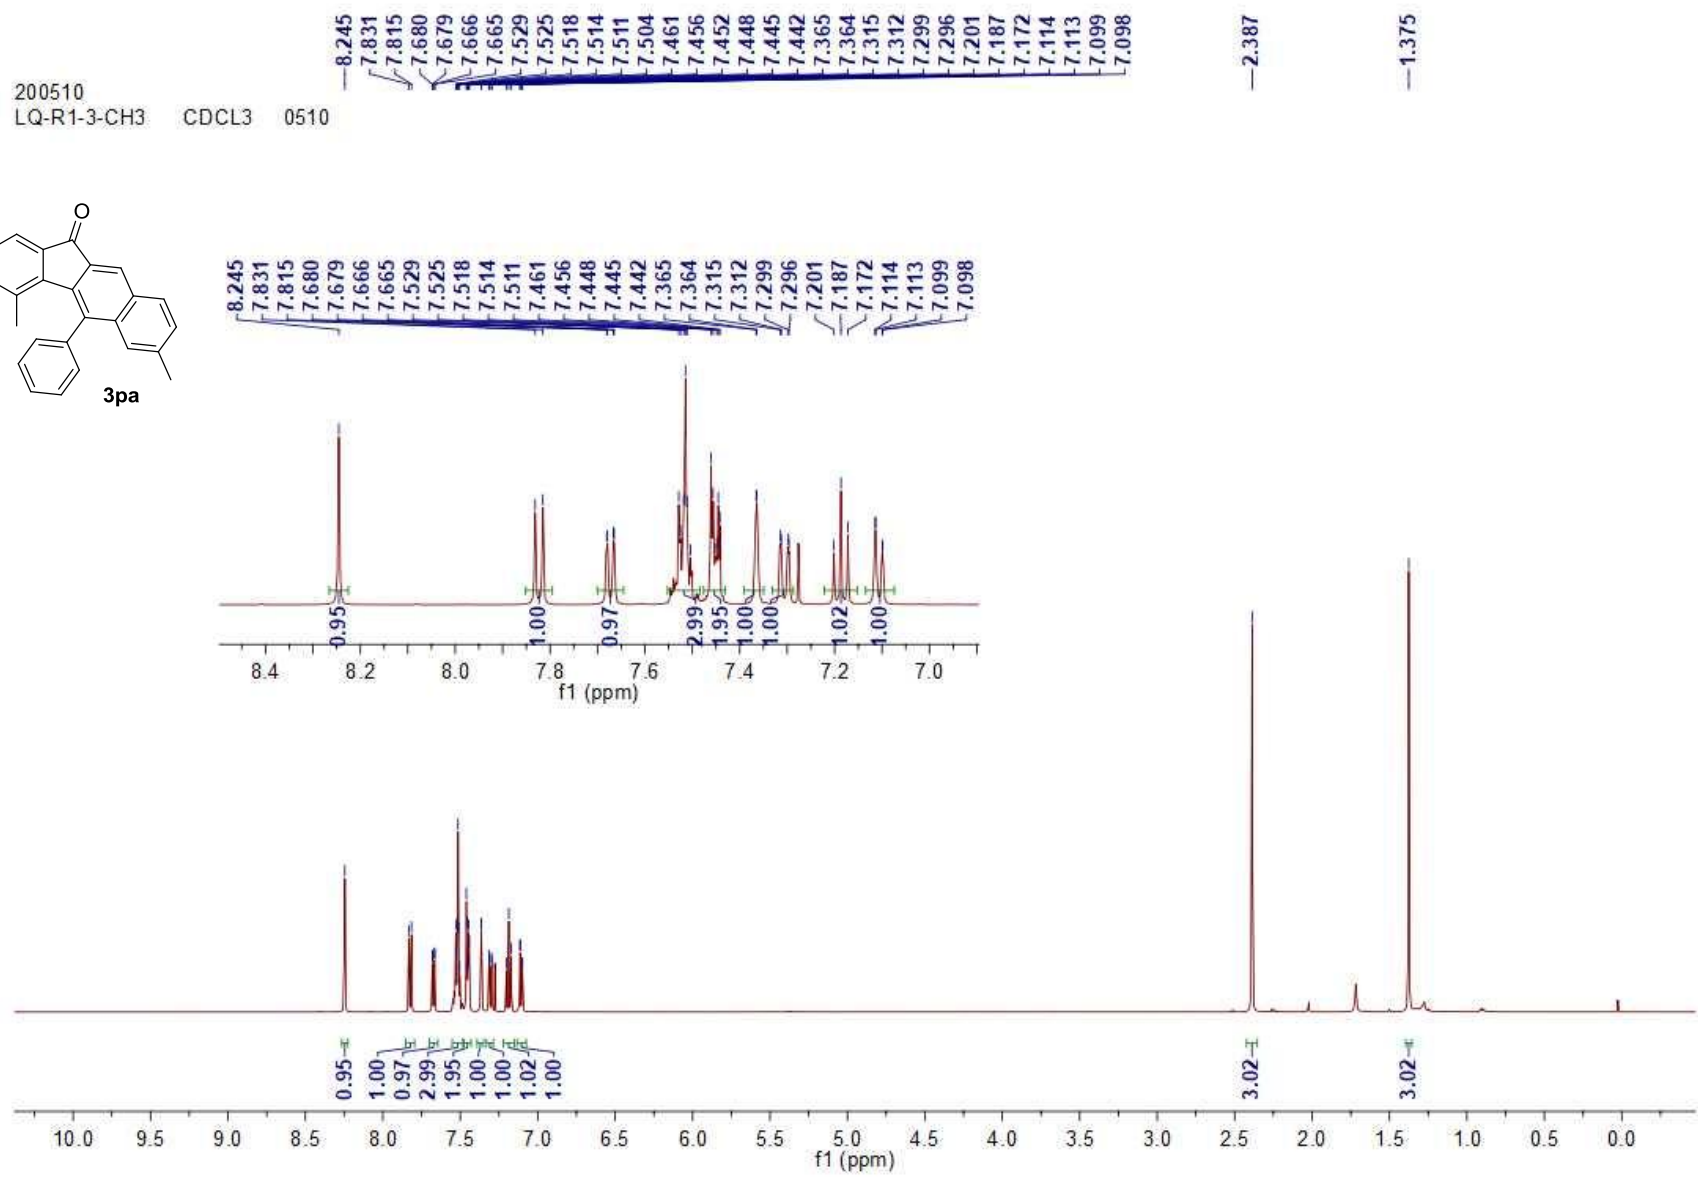

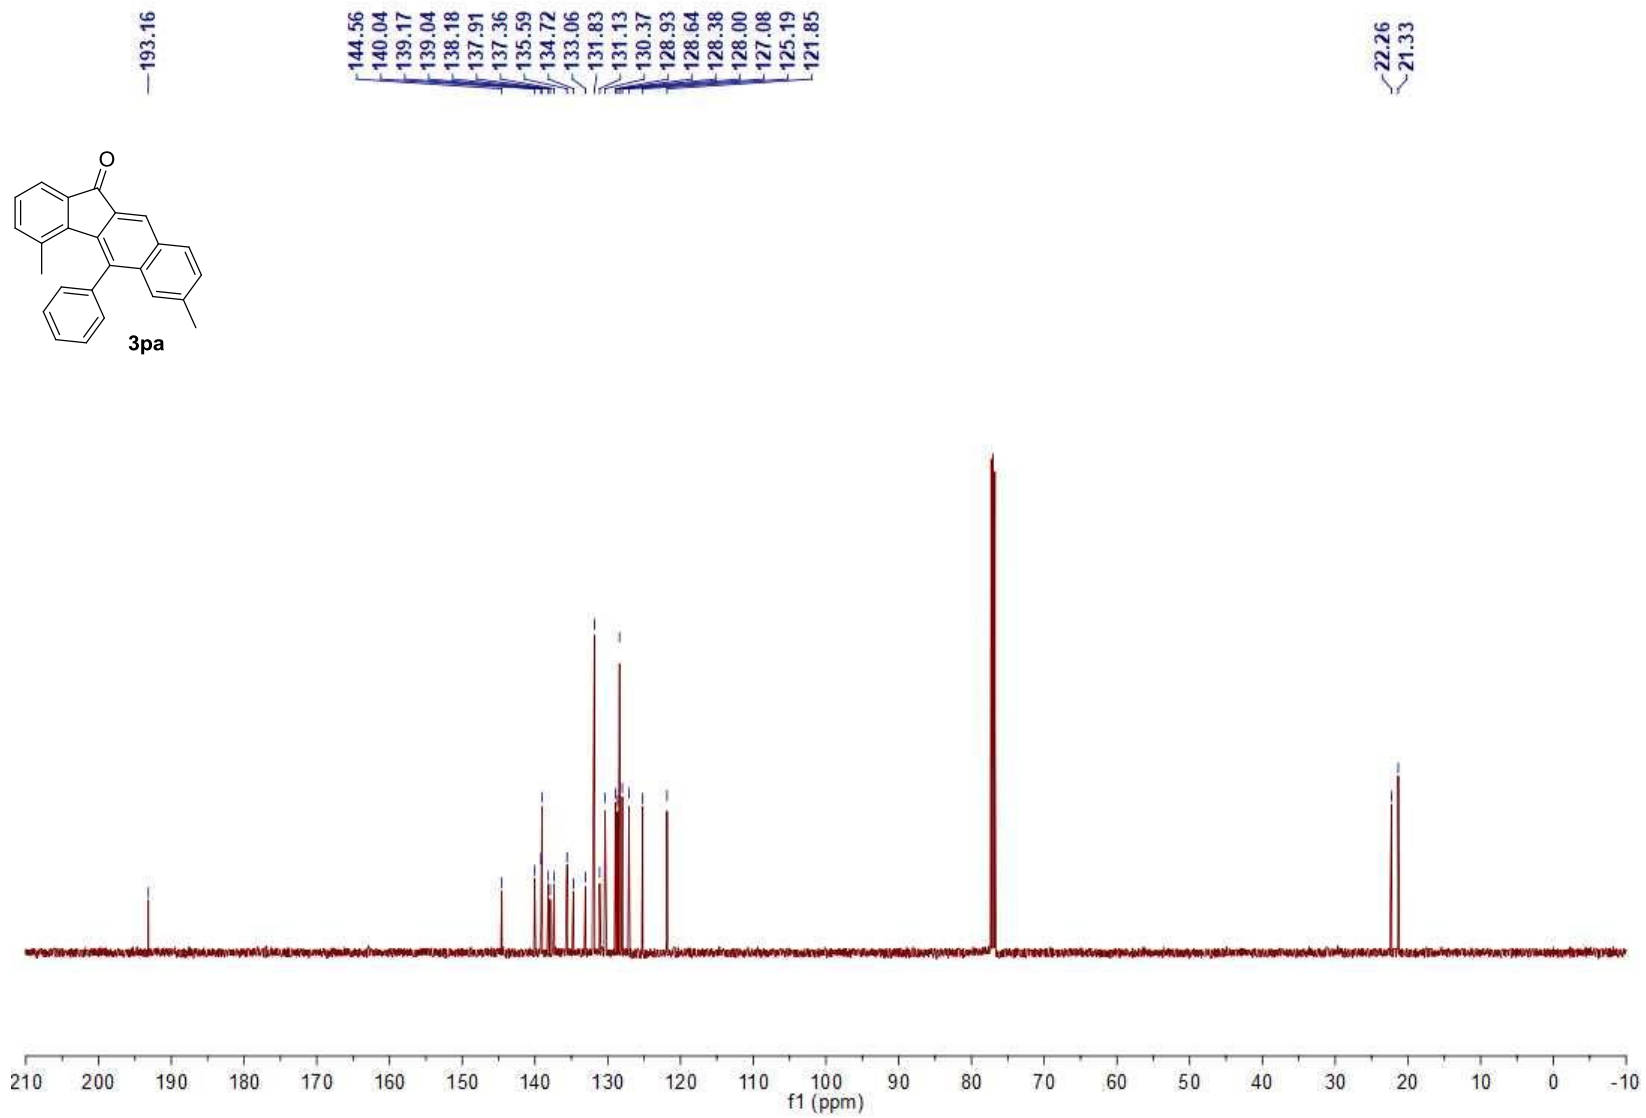

200102  
LQ-R1-4-och3 CDCI3 0102

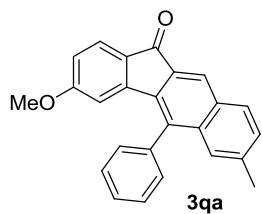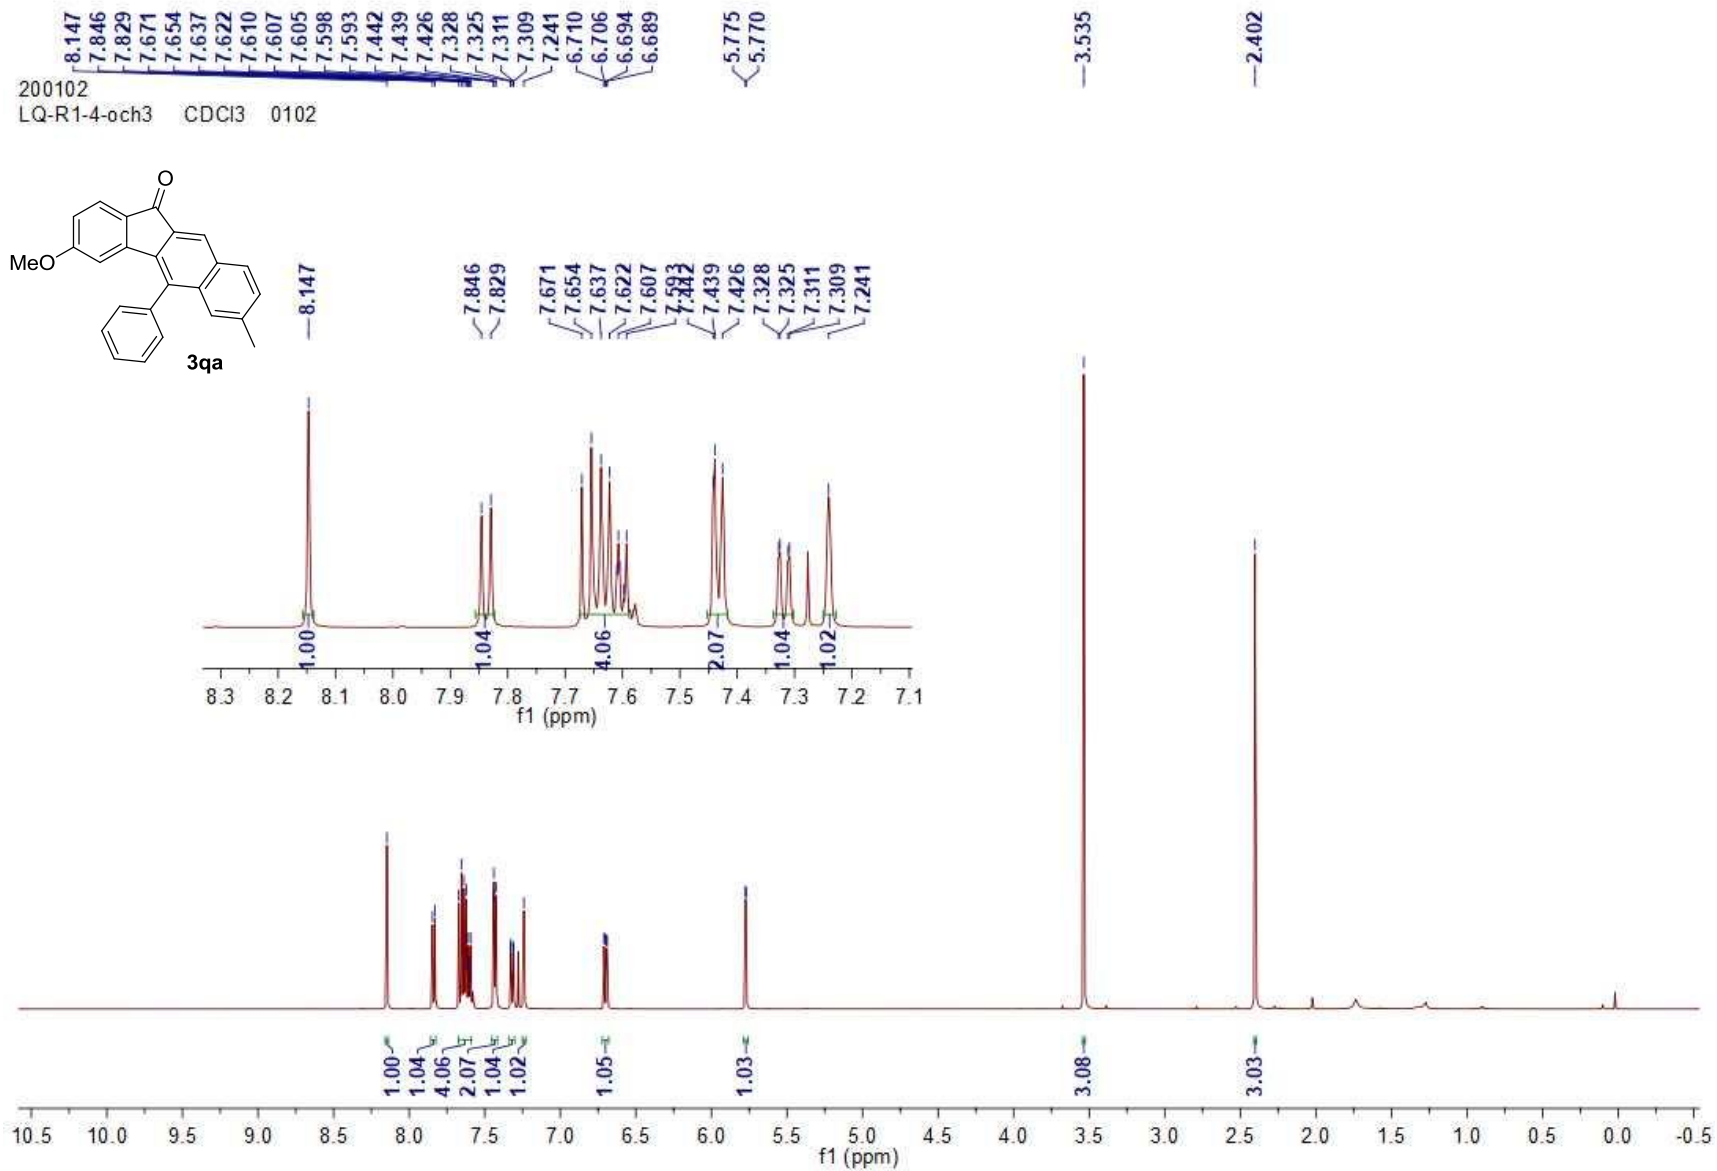

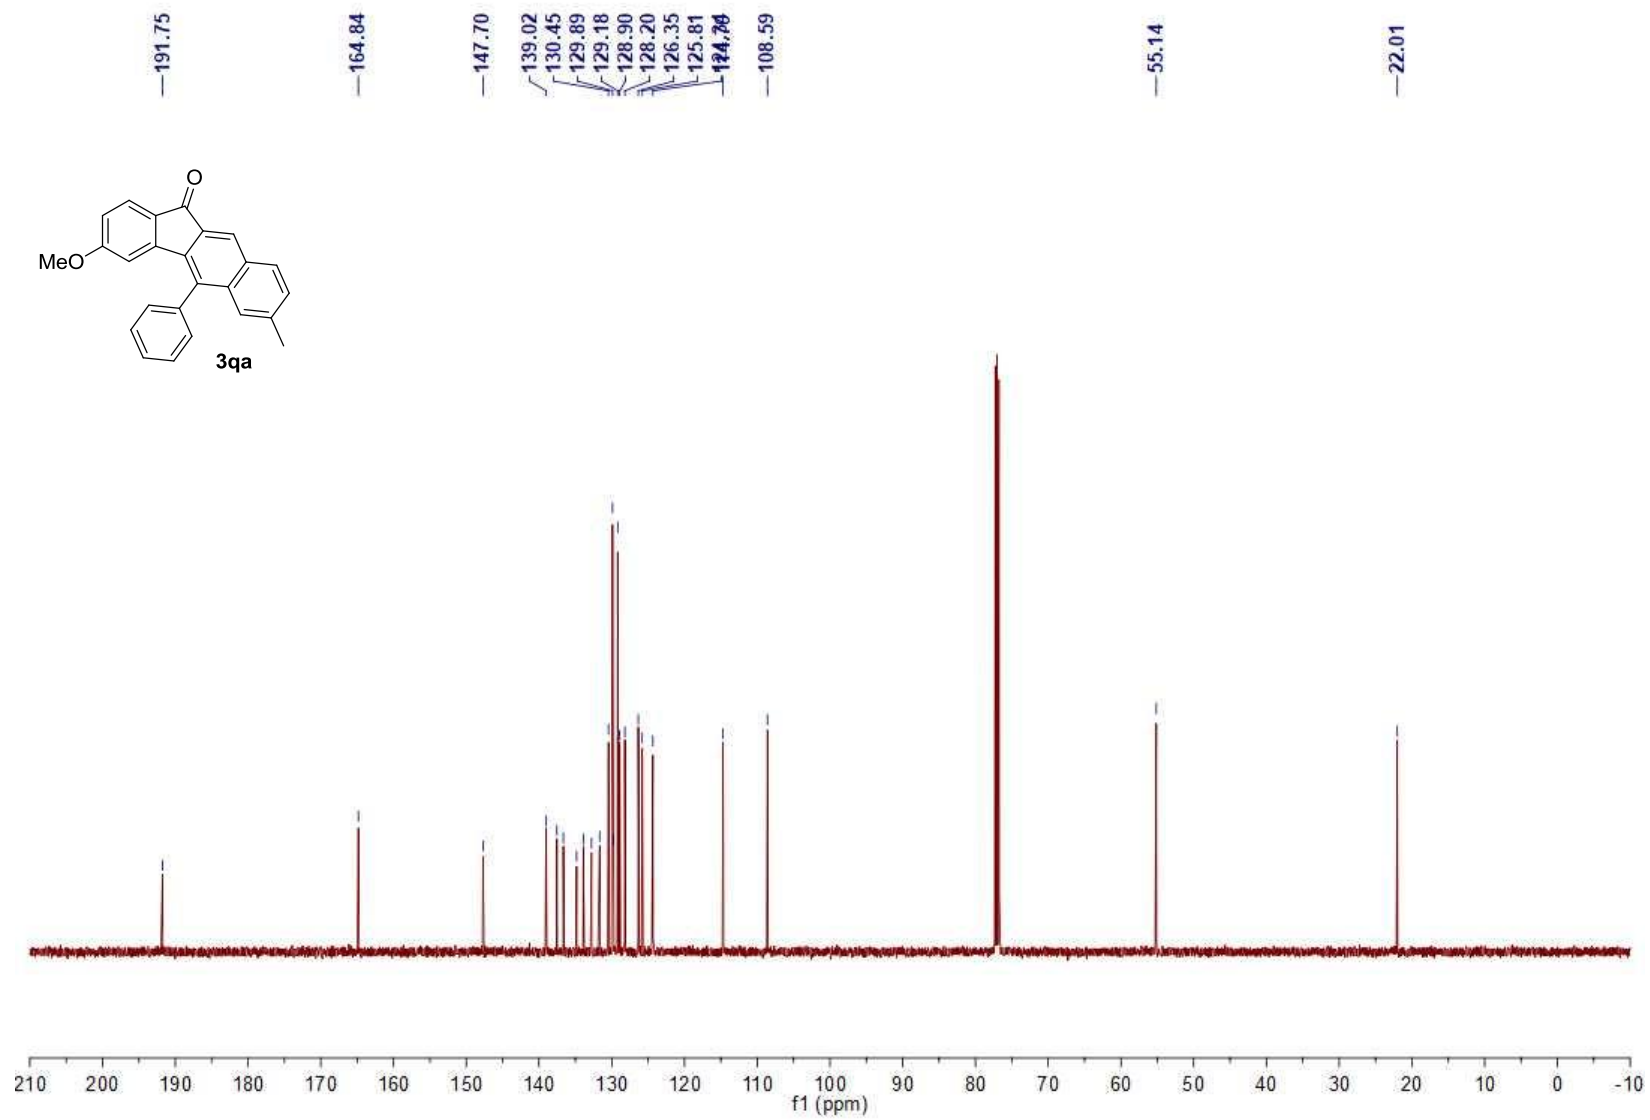

200106  
LQ-R1-5-F CDC13 0106

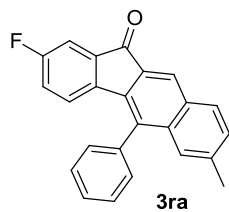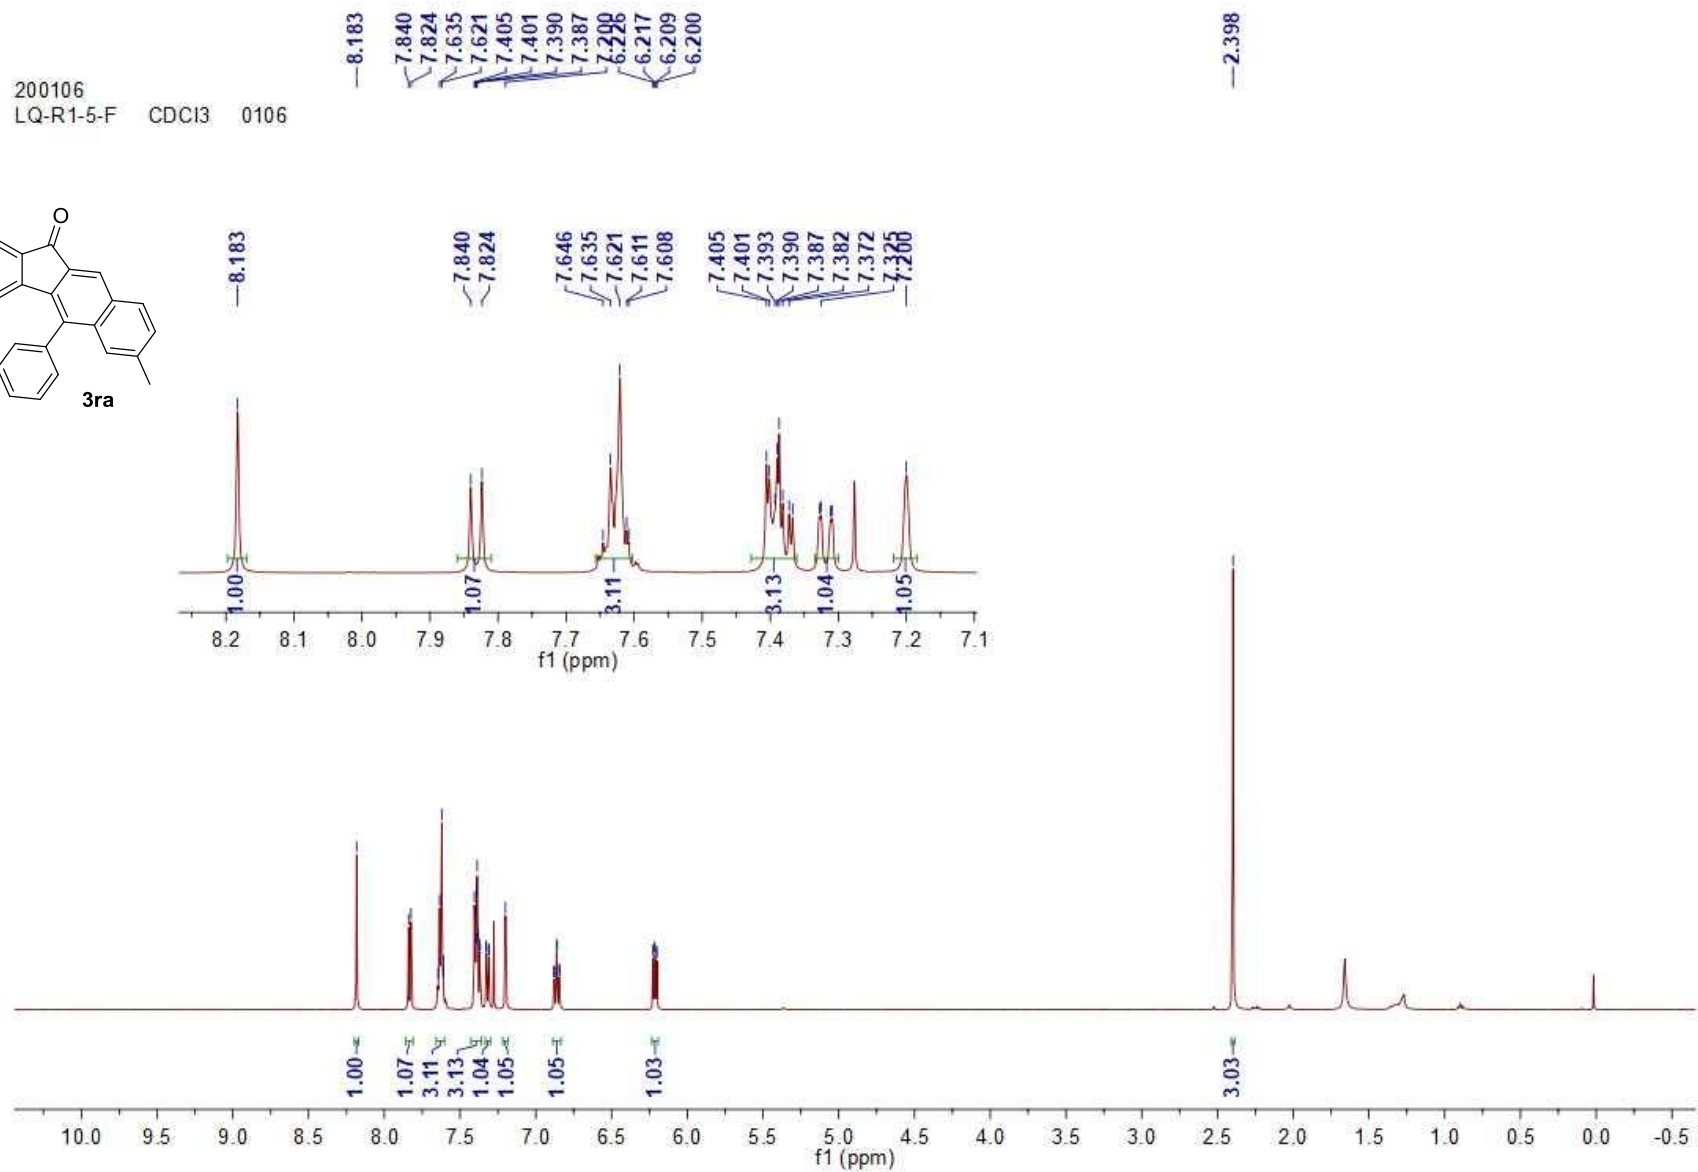



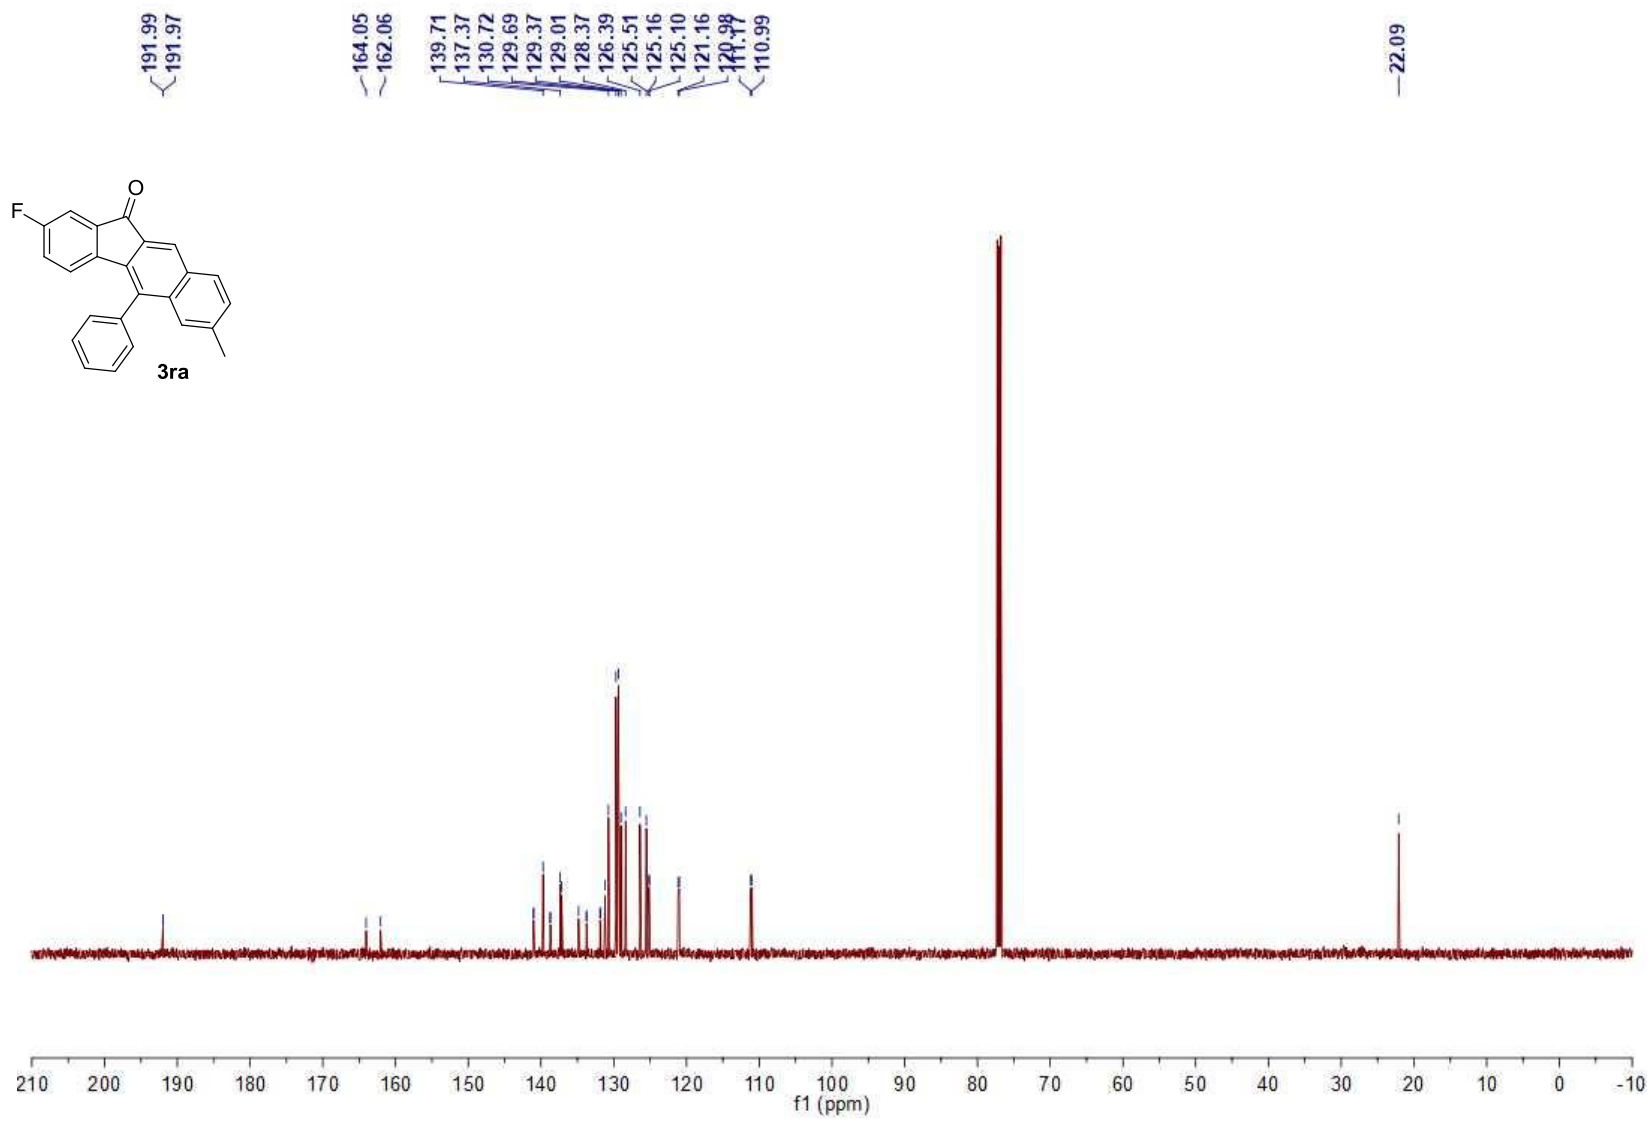

8.239  
 7.952  
 7.937  
 7.750  
 7.736  
 7.625  
 7.612  
 7.603  
 7.487  
 7.482  
 7.473  
 7.464  
 7.454  
 7.426  
 7.422  
 7.411  
 7.248  
 7.233  
 7.219  
 7.212  
 7.210  
 7.195  
 6.342  
 200513  
 LQ-R3-aniline CDCL3 0513

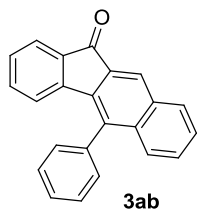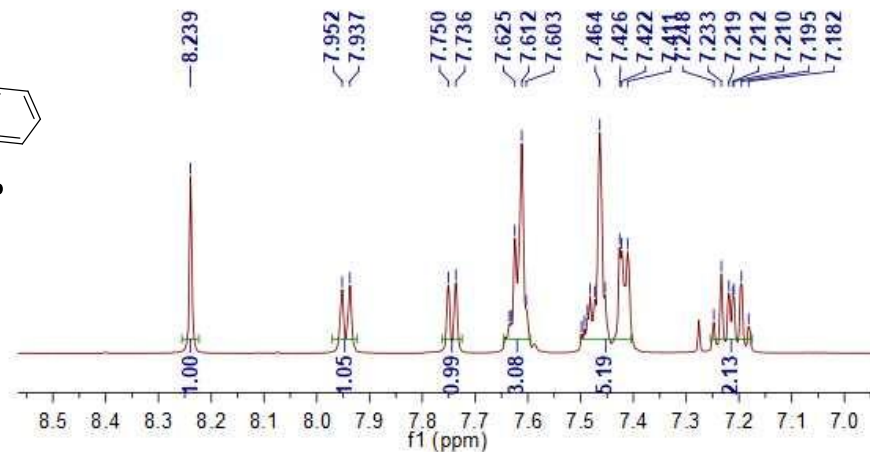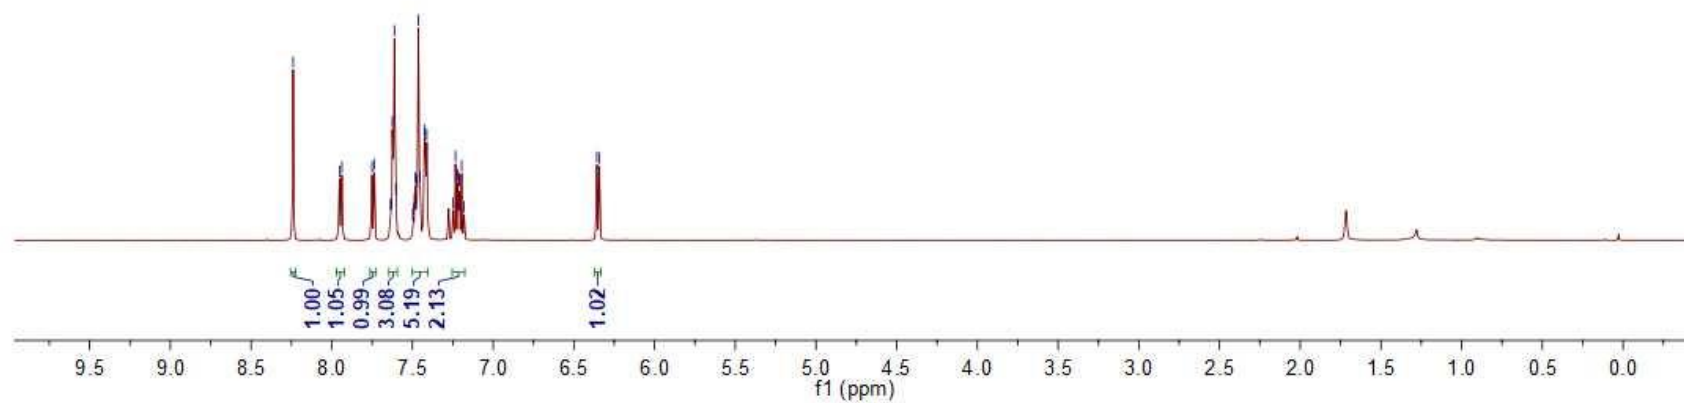

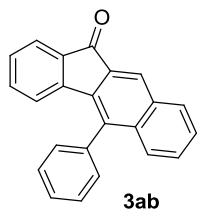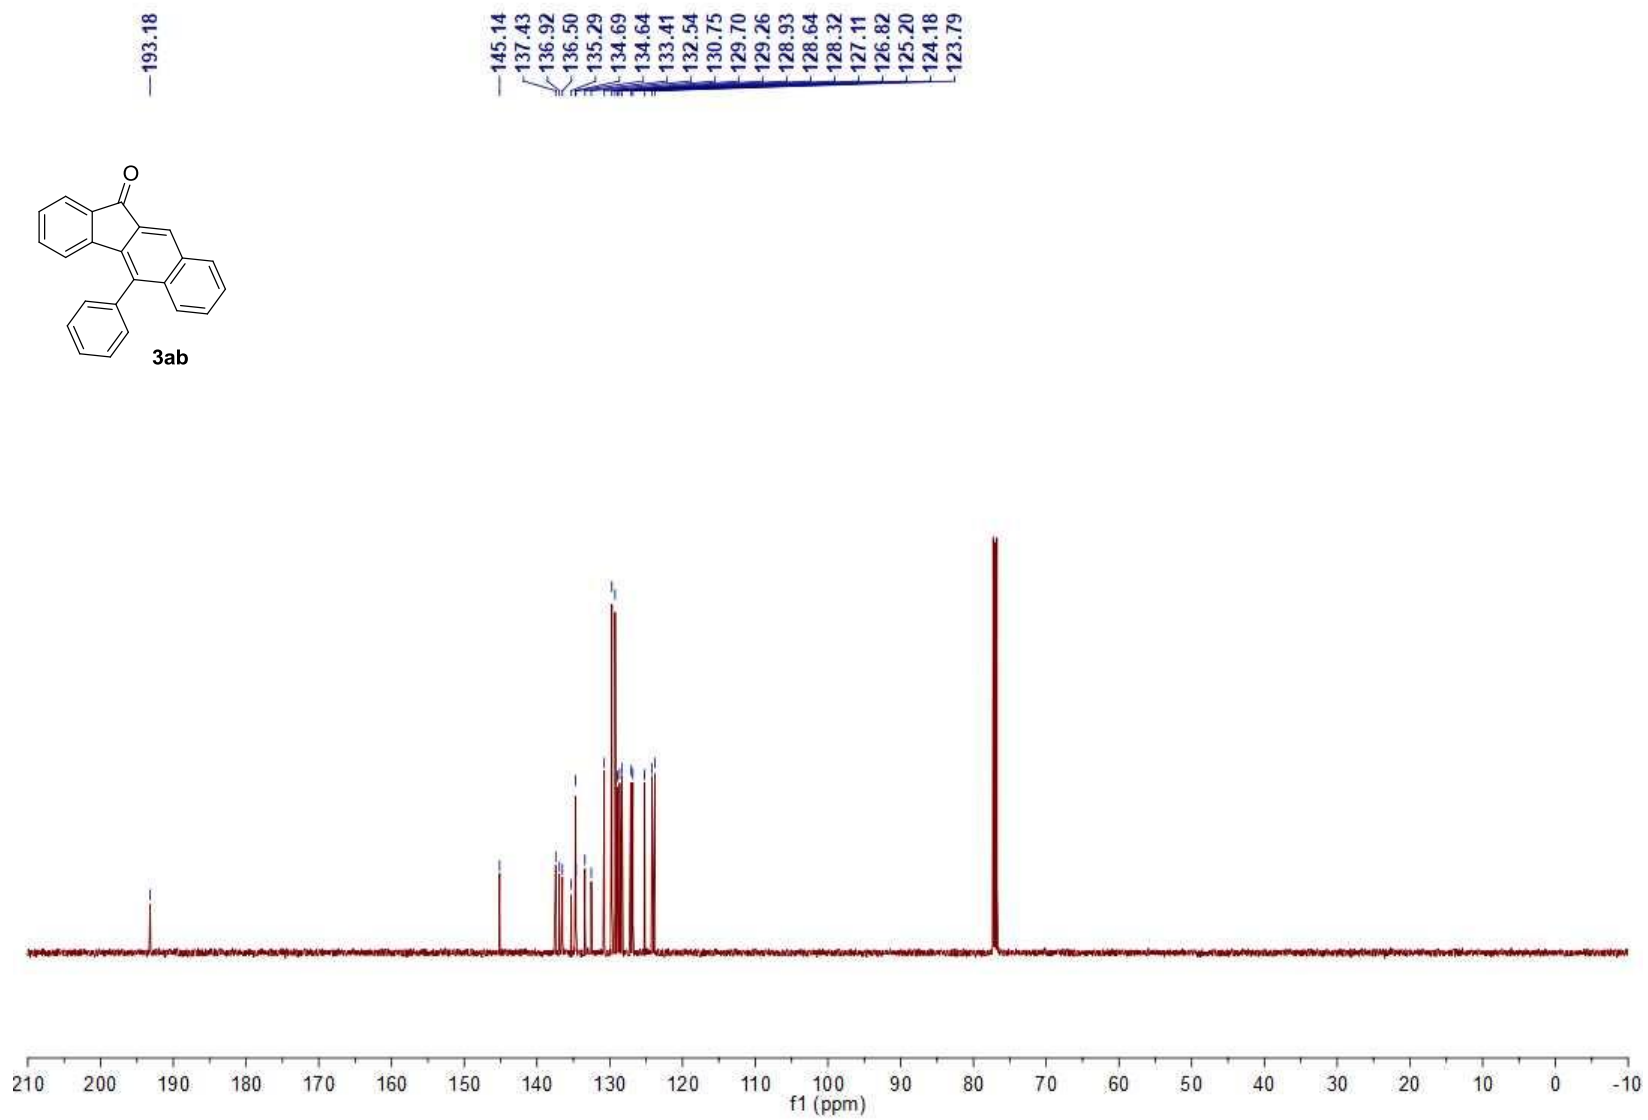

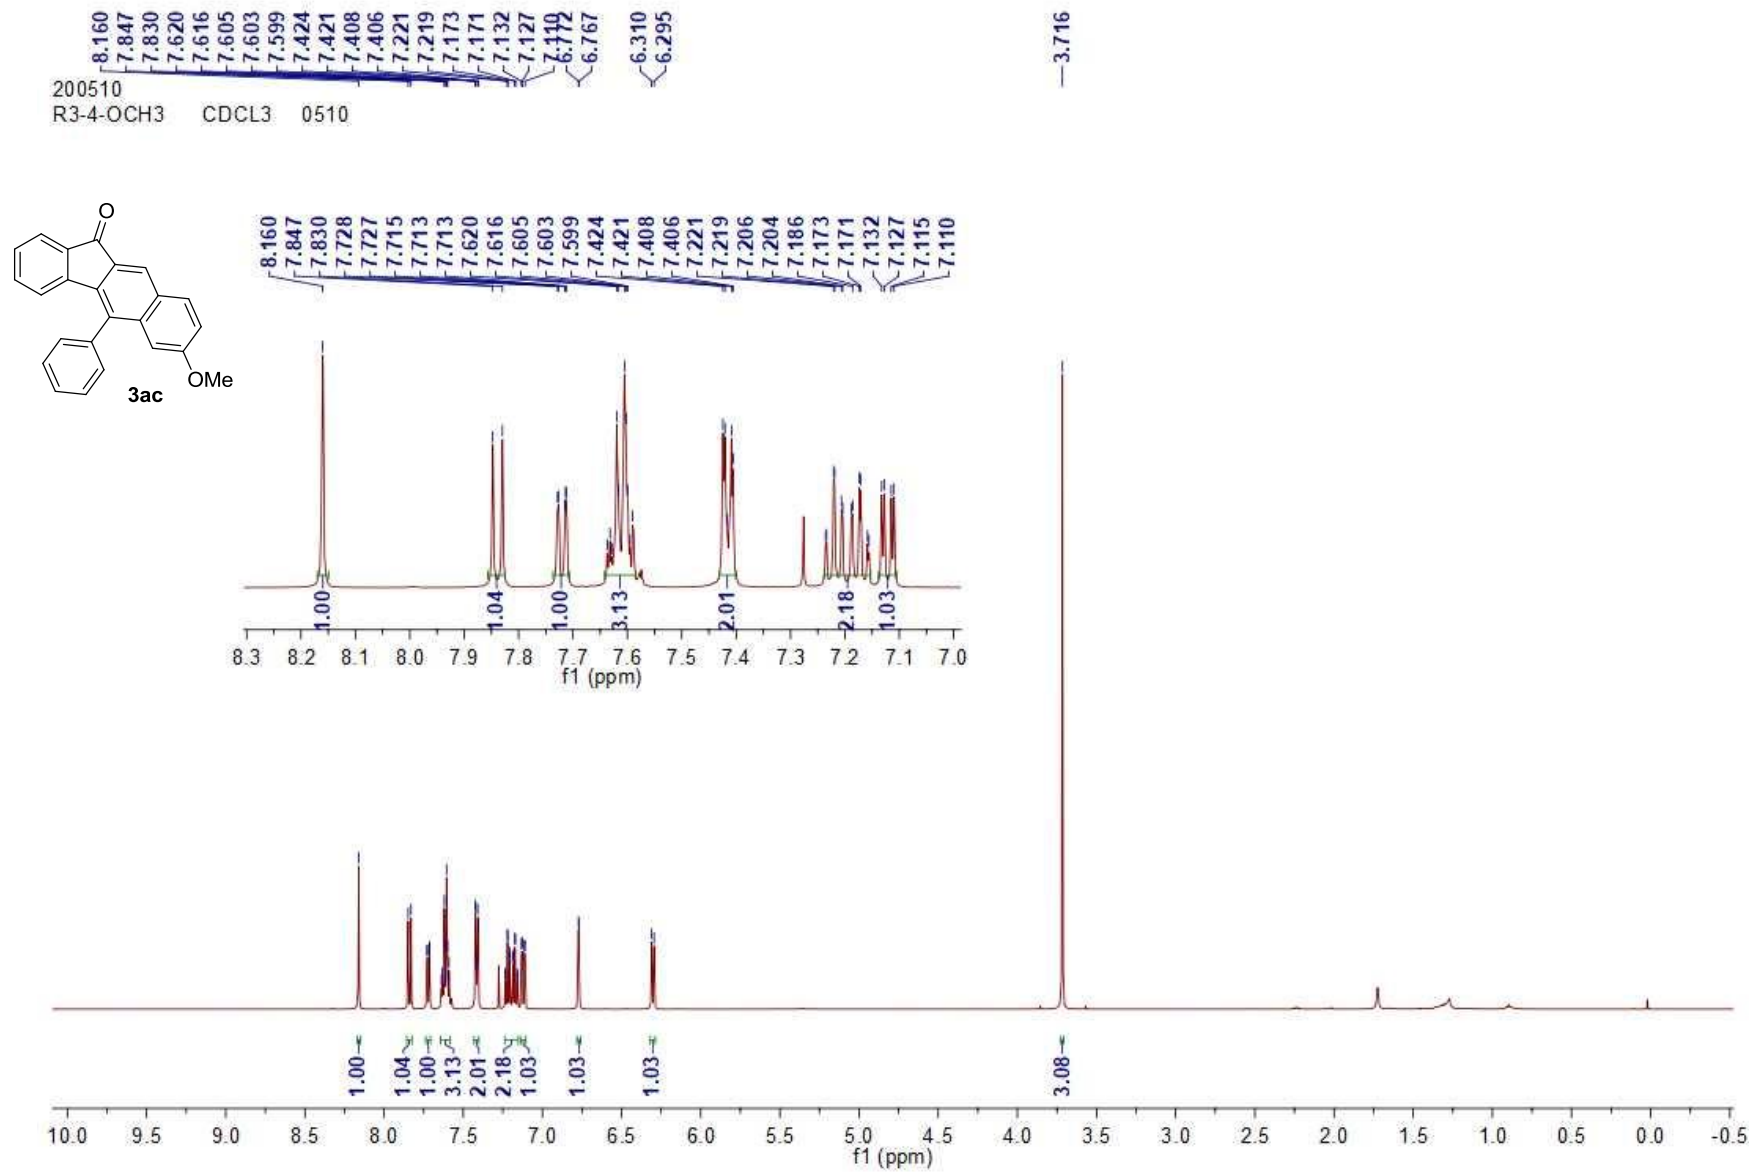

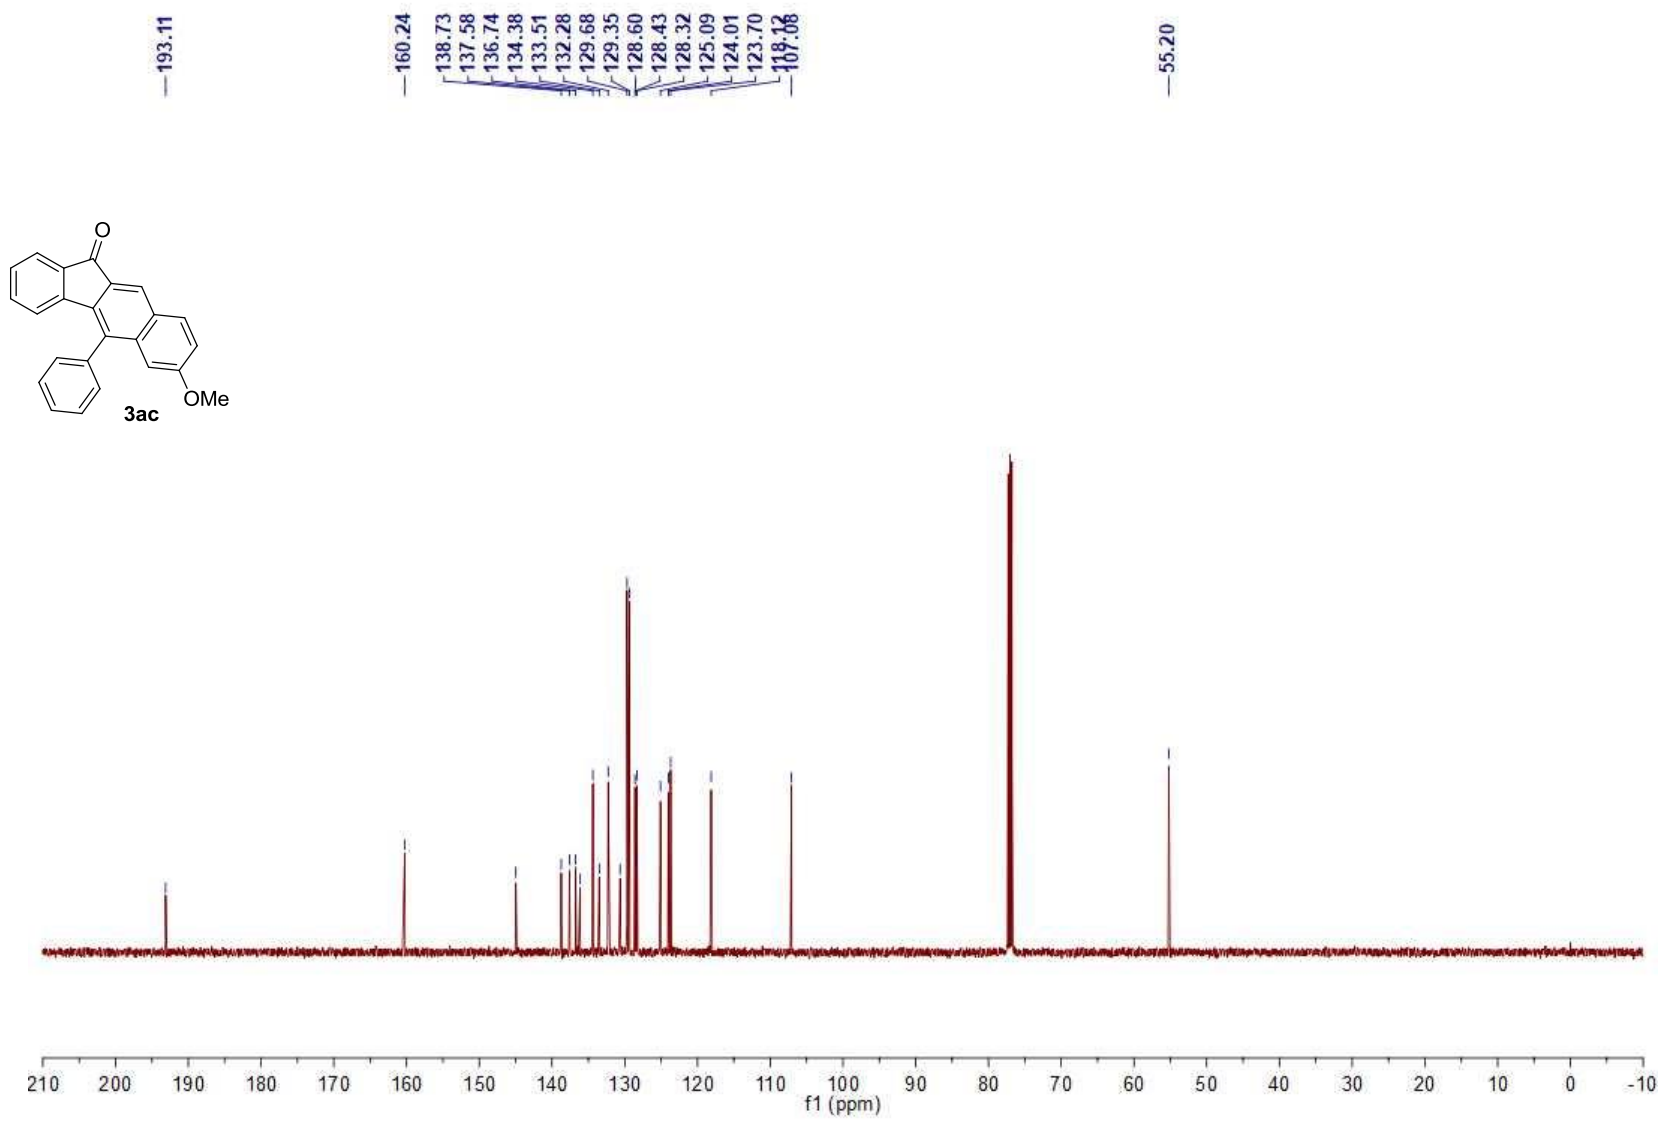

200106  
LQ-R3-4-I-Proyl CDCI3 0106

|       |       |       |       |       |       |       |       |       |       |       |       |       |       |       |       |       |       |       |       |       |       |       |       |       |
|-------|-------|-------|-------|-------|-------|-------|-------|-------|-------|-------|-------|-------|-------|-------|-------|-------|-------|-------|-------|-------|-------|-------|-------|-------|
| 8.212 | 7.902 | 7.885 | 7.744 | 7.742 | 7.729 | 7.728 | 7.634 | 7.623 | 7.619 | 7.431 | 7.427 | 7.415 | 7.401 | 7.397 | 7.255 | 7.225 | 7.223 | 7.211 | 7.208 | 7.198 | 7.186 | 7.183 | 6.314 | 6.299 |
|-------|-------|-------|-------|-------|-------|-------|-------|-------|-------|-------|-------|-------|-------|-------|-------|-------|-------|-------|-------|-------|-------|-------|-------|-------|

|       |       |       |       |       |       |       |
|-------|-------|-------|-------|-------|-------|-------|
| 2.971 | 2.957 | 2.943 | 2.929 | 2.916 | 2.902 | 2.888 |
|-------|-------|-------|-------|-------|-------|-------|

|       |       |
|-------|-------|
| 1.233 | 1.219 |
|-------|-------|

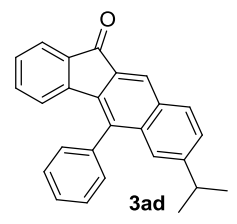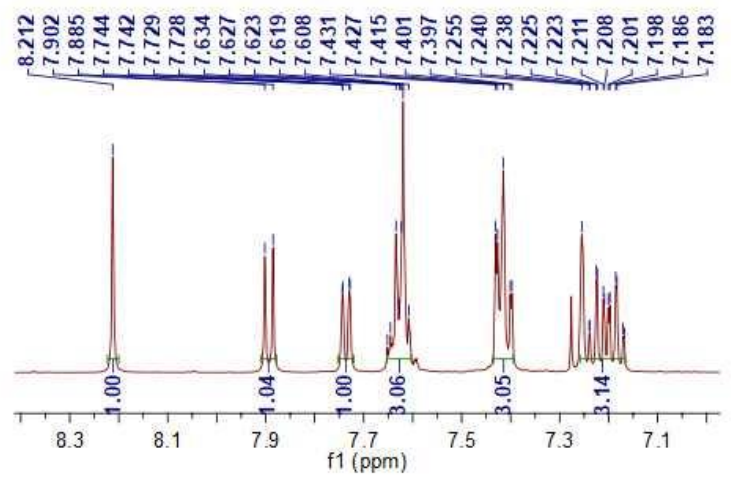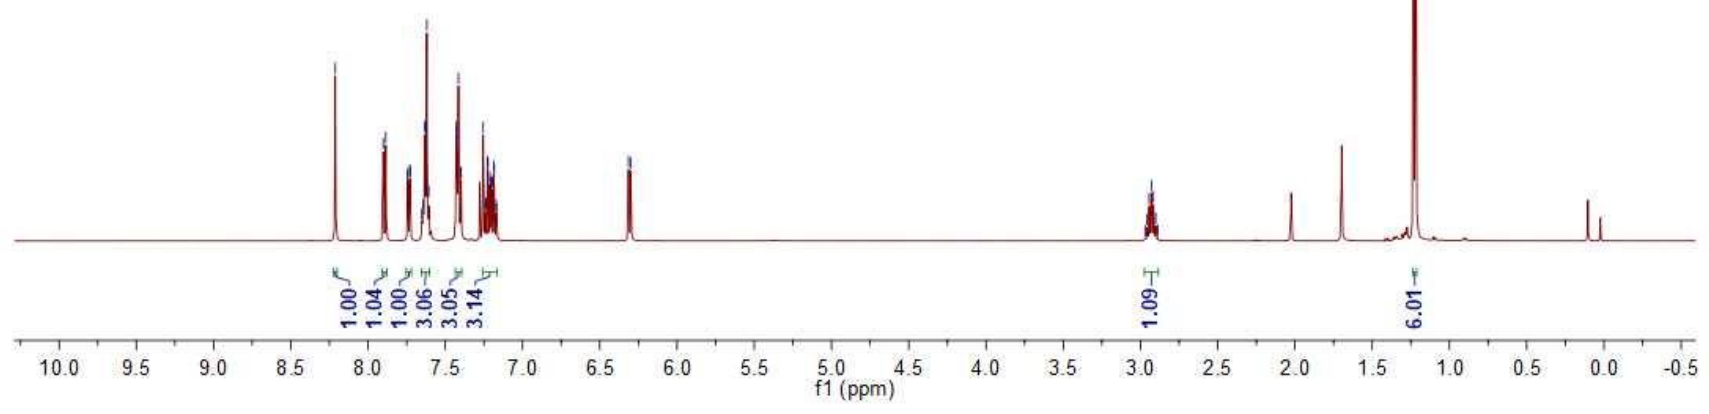

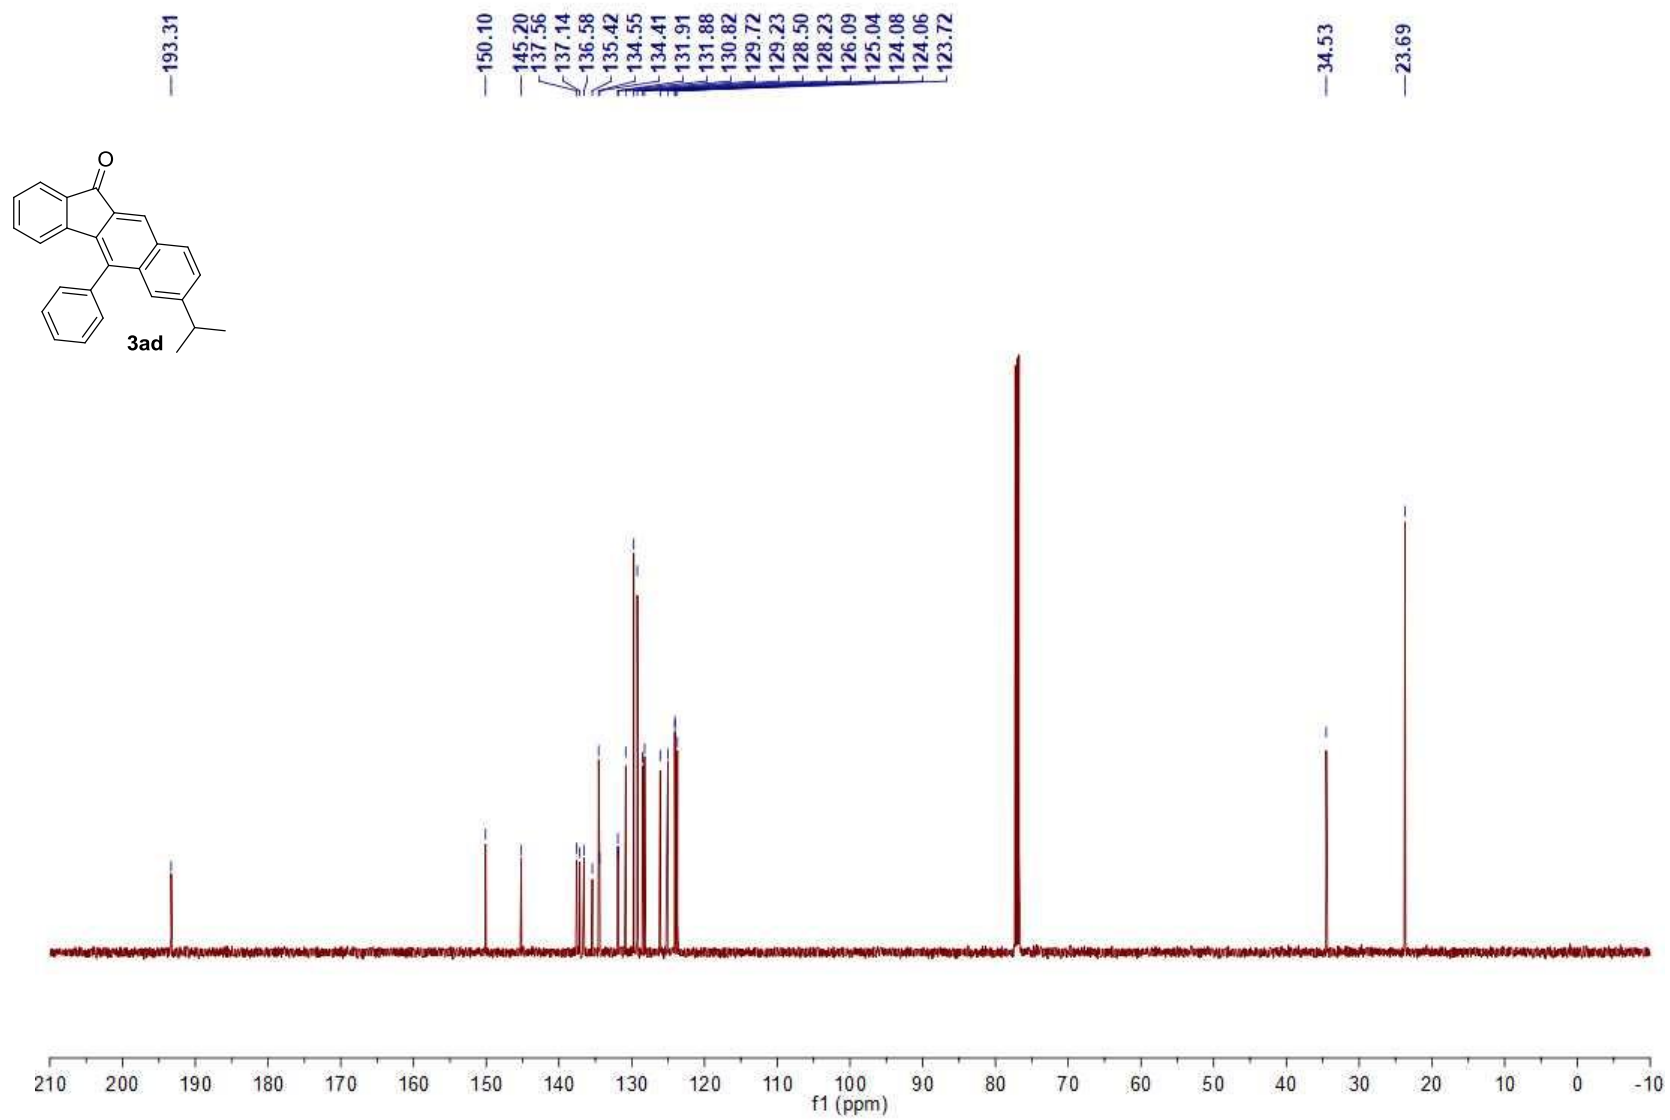

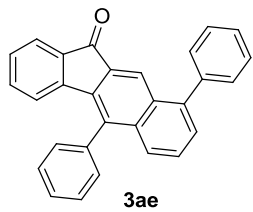

8.317  
7.638  
7.621  
7.538  
7.522  
7.504  
7.486  
7.475  
7.453  
7.431  
7.420  
7.396  
6.324  
6.306

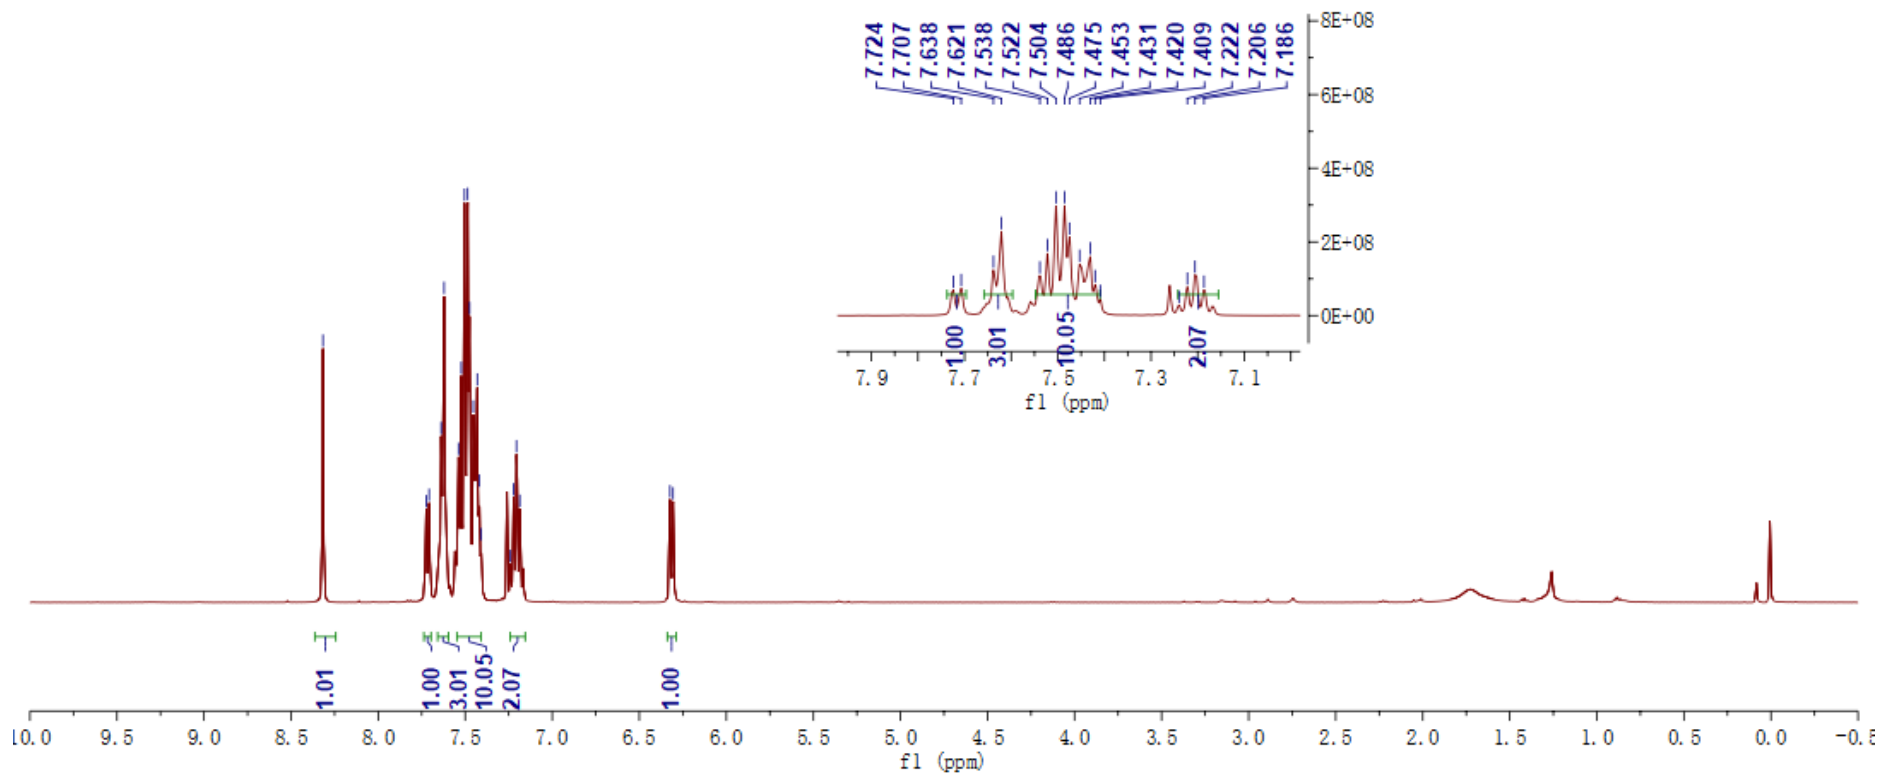



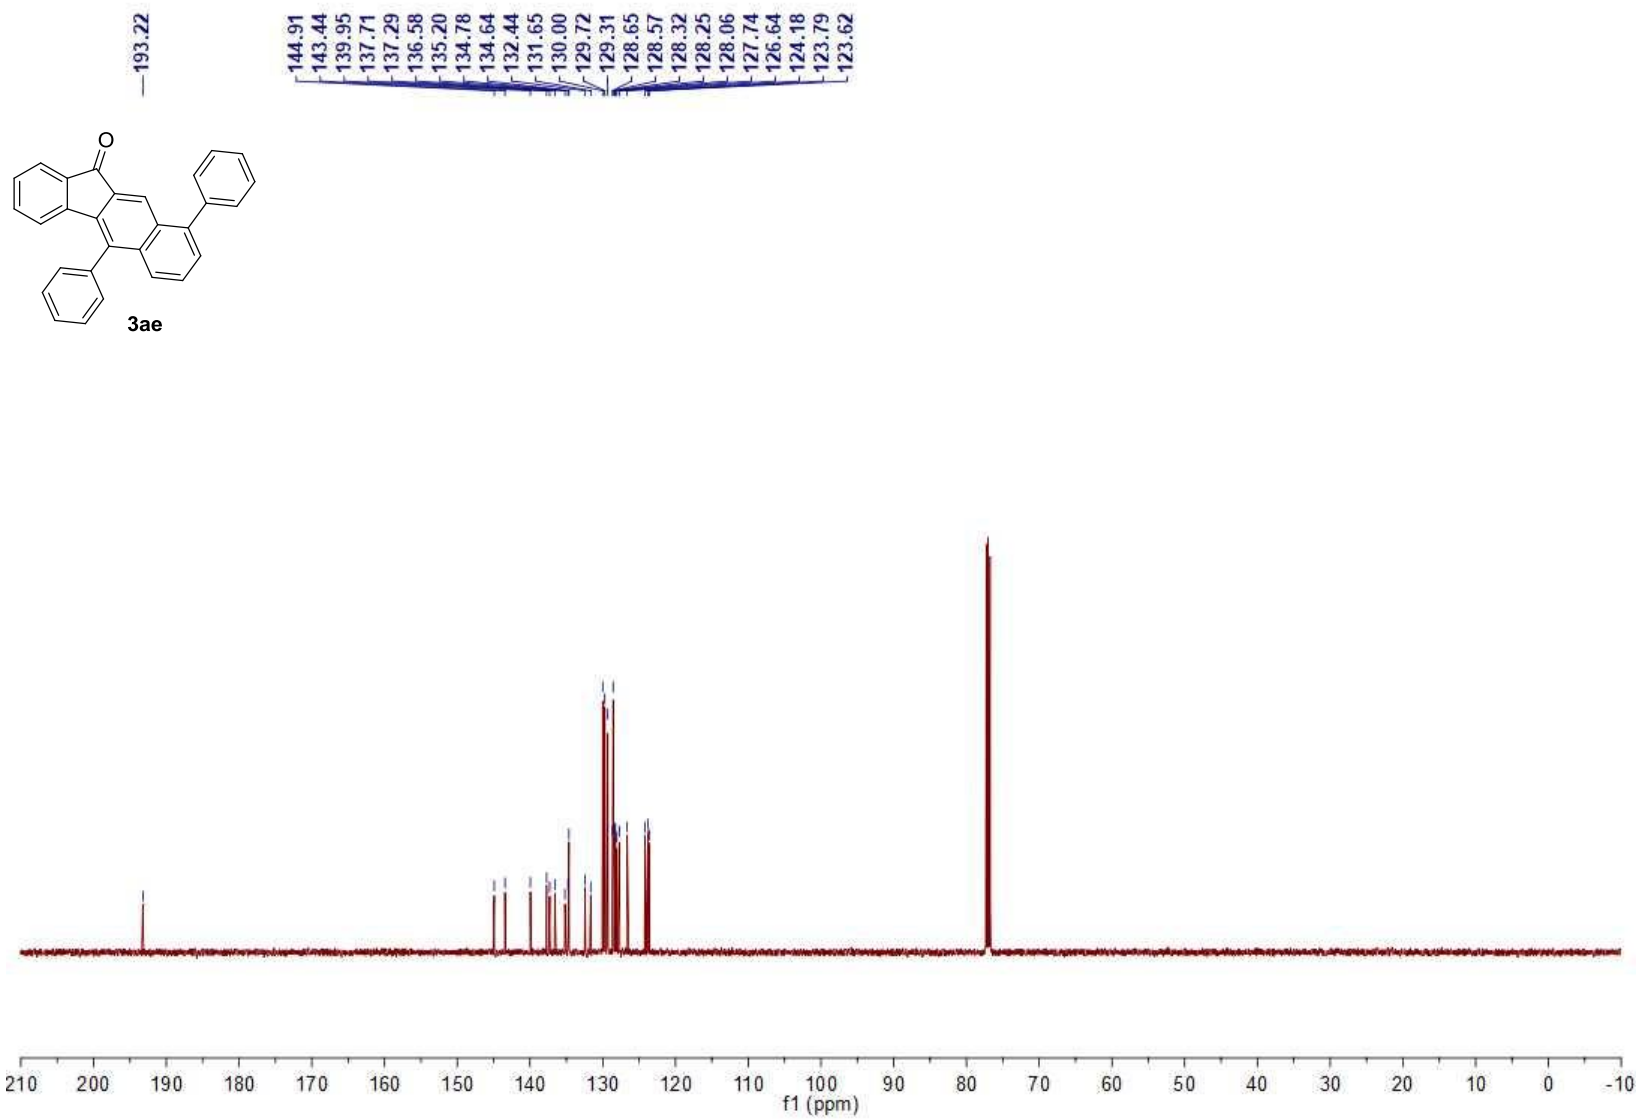

200513  
LQ-R3-3,5-dimethyl CDCL3 0513

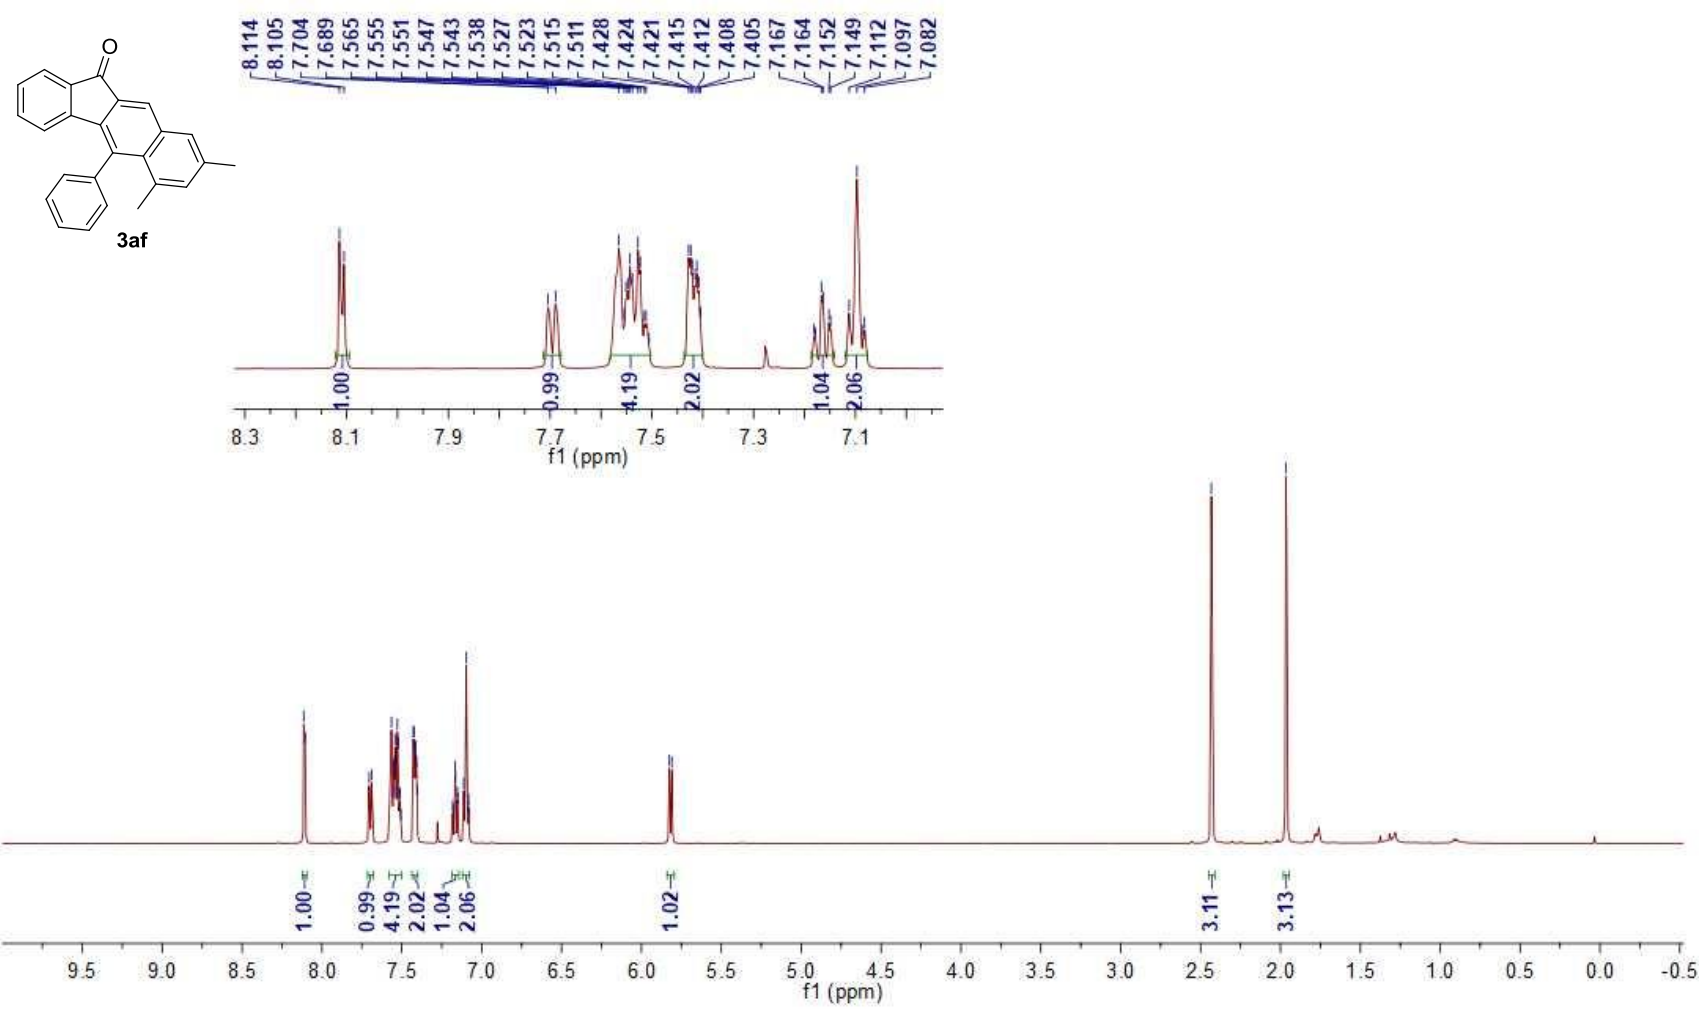

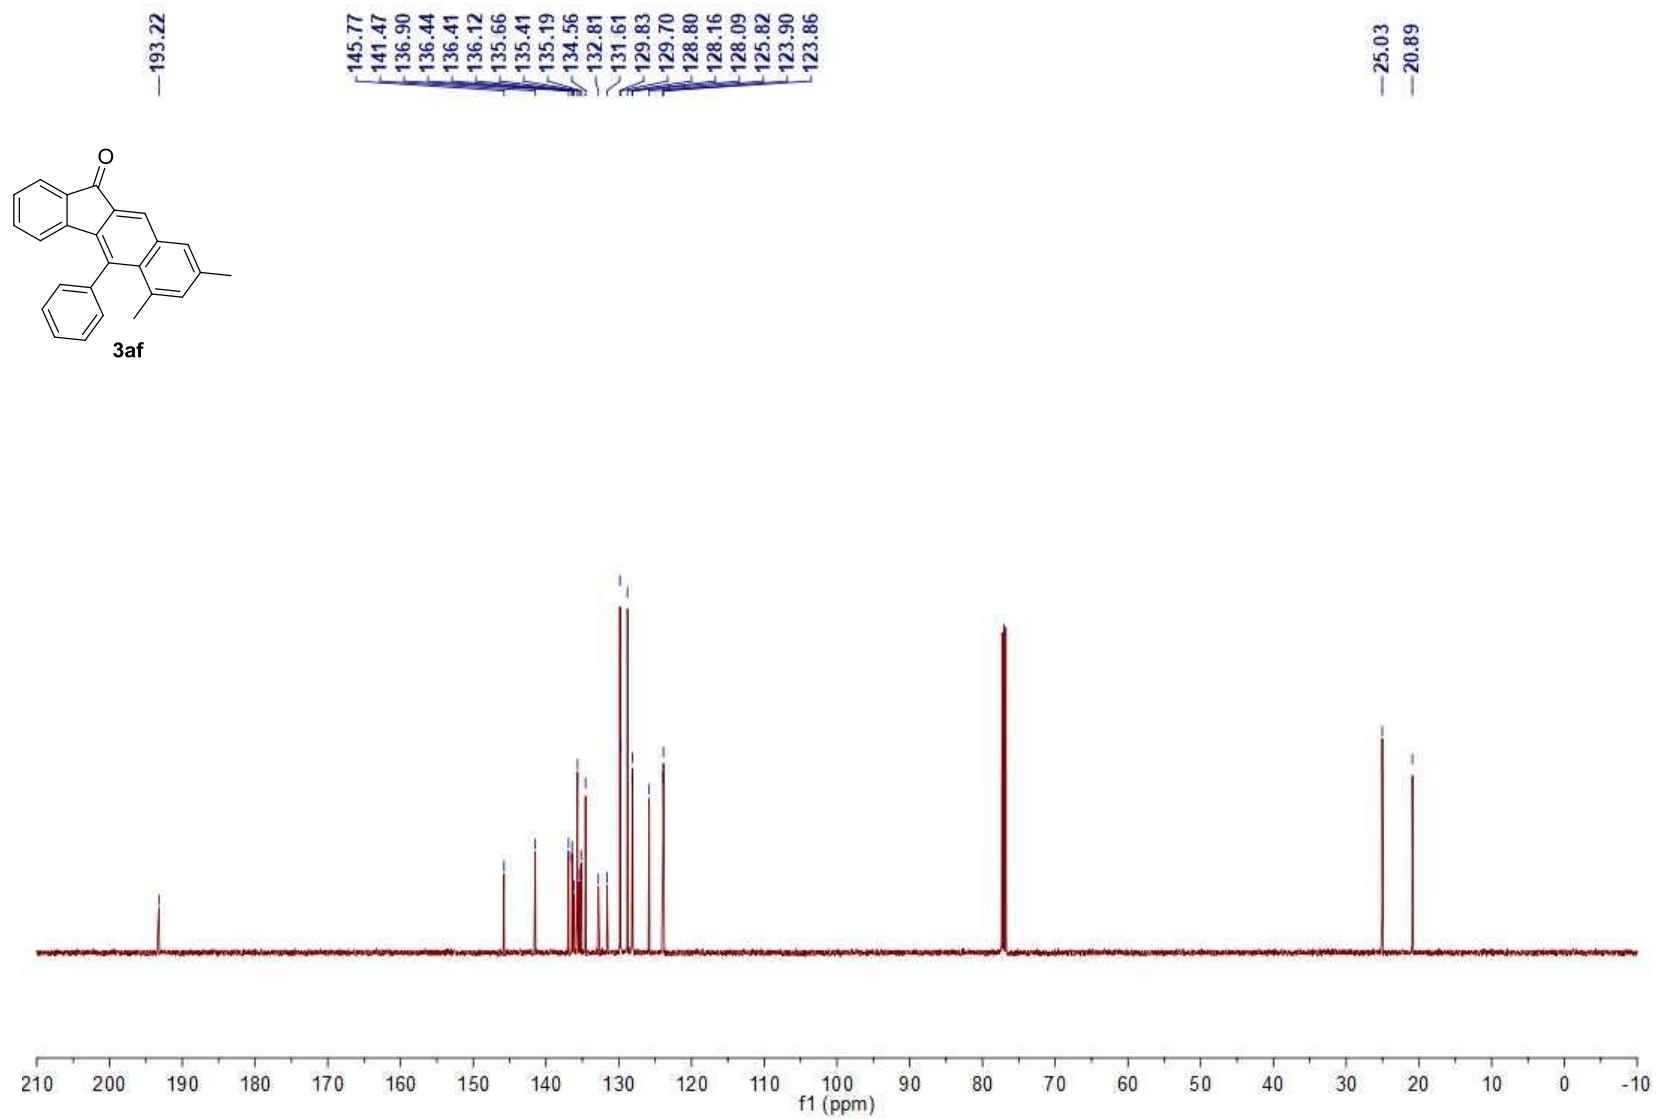

200513  
LQ-R3-4-methylbenzoate CDCL3 0513

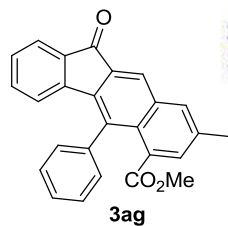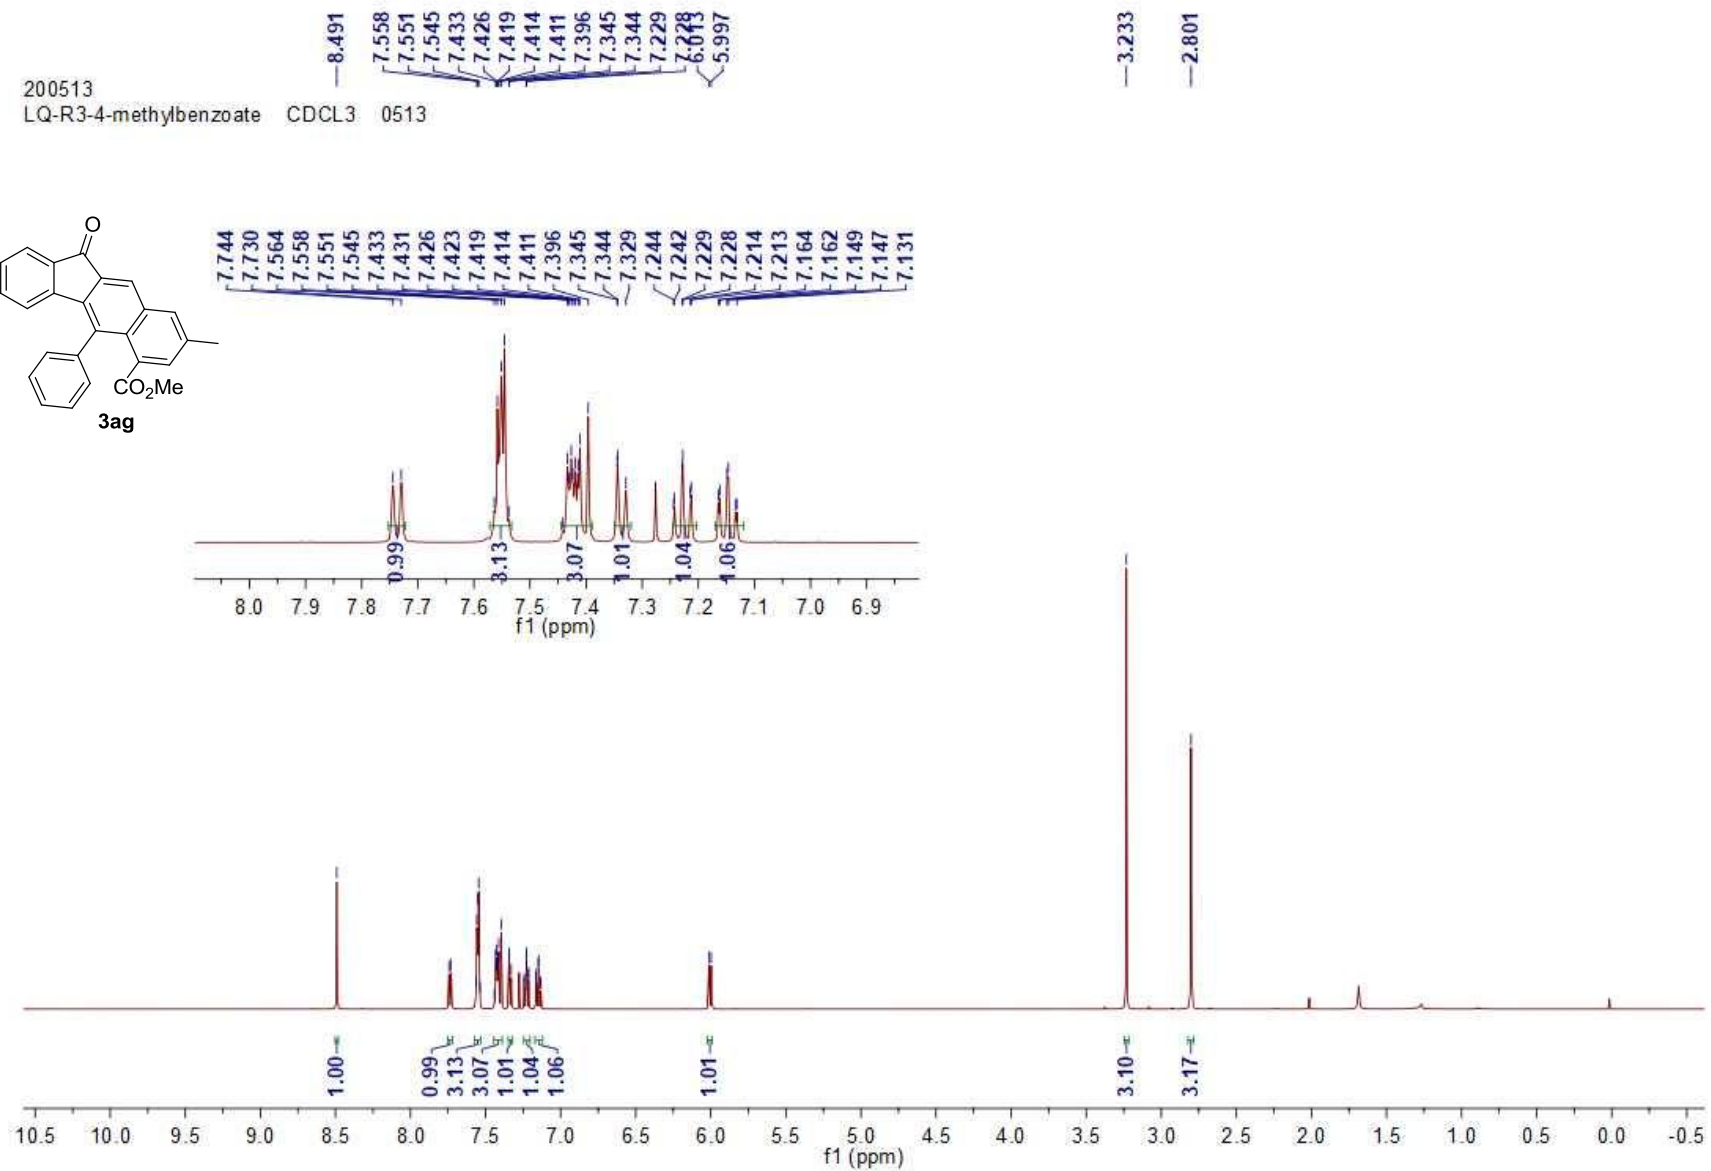

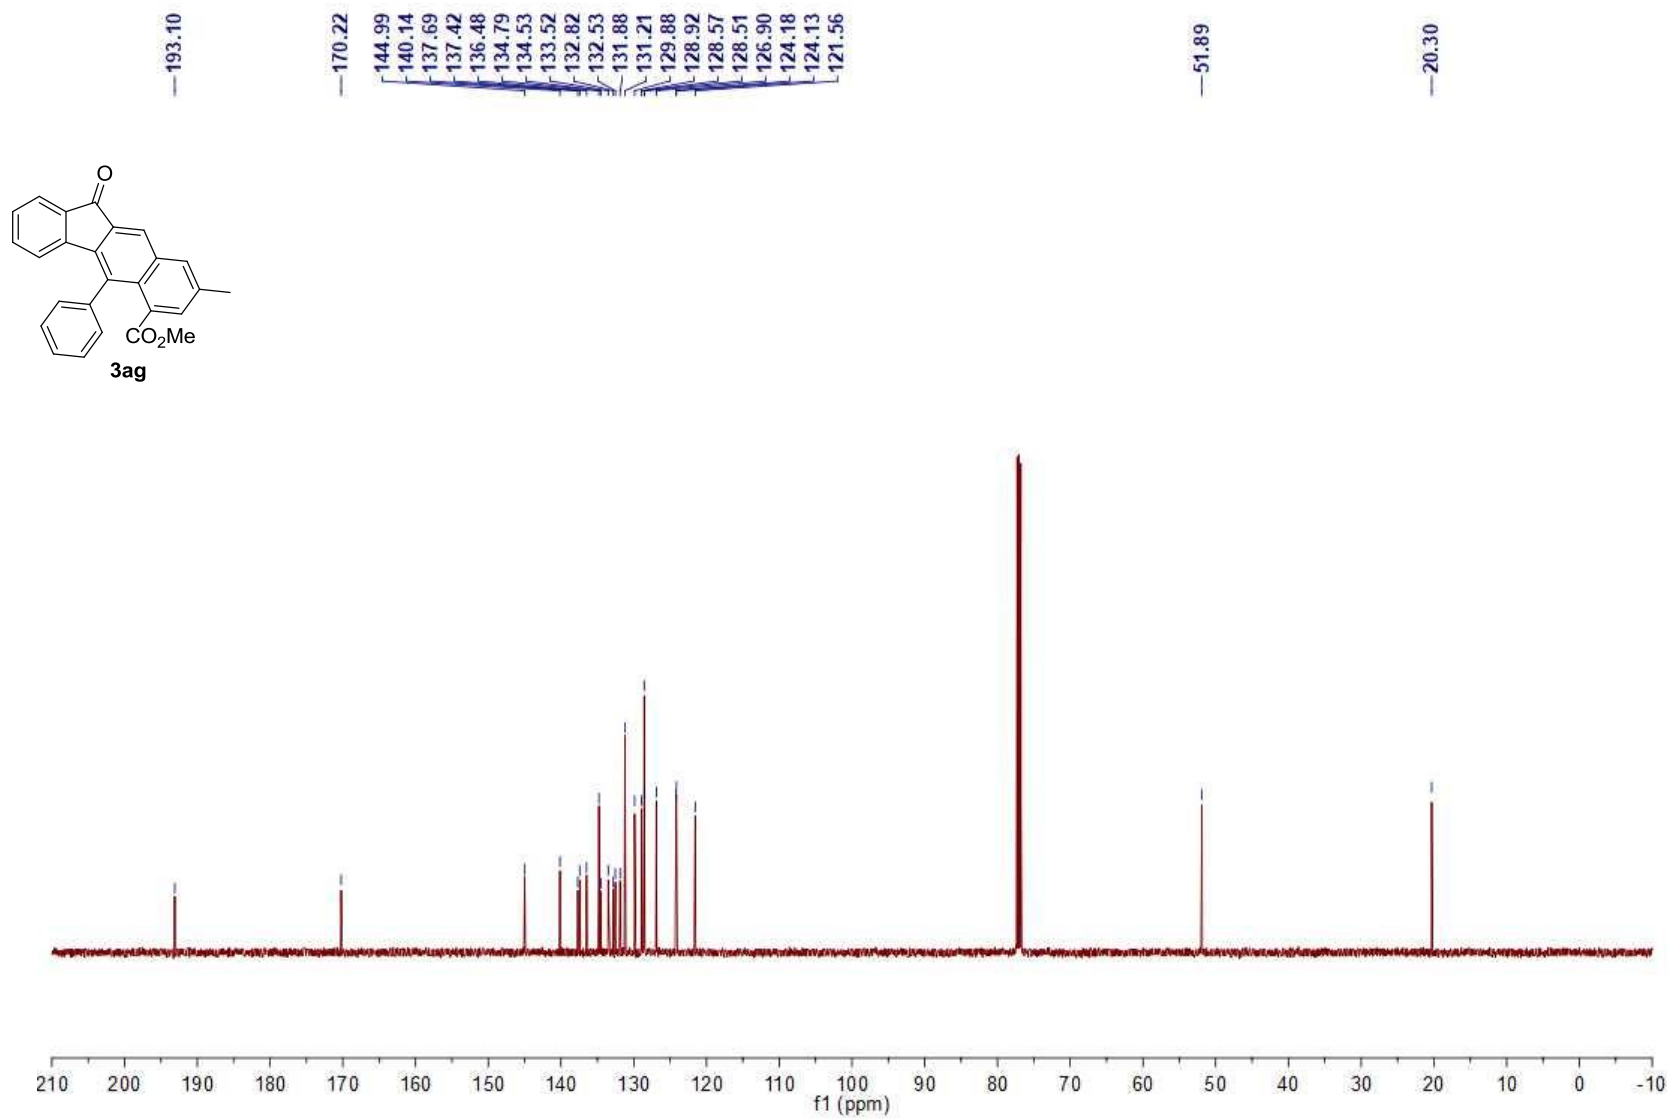

200106  
LQ-R3-4-CL-2-CH3

CDCI3 0106

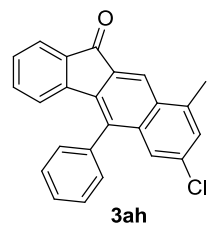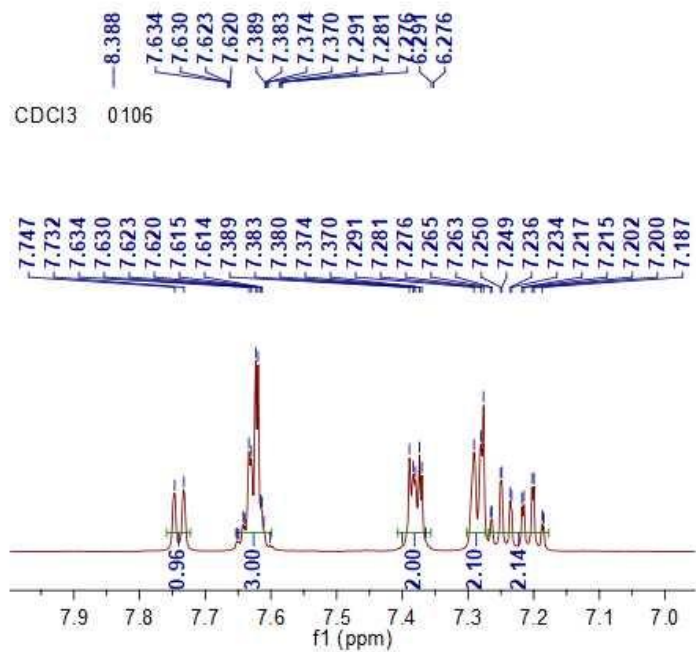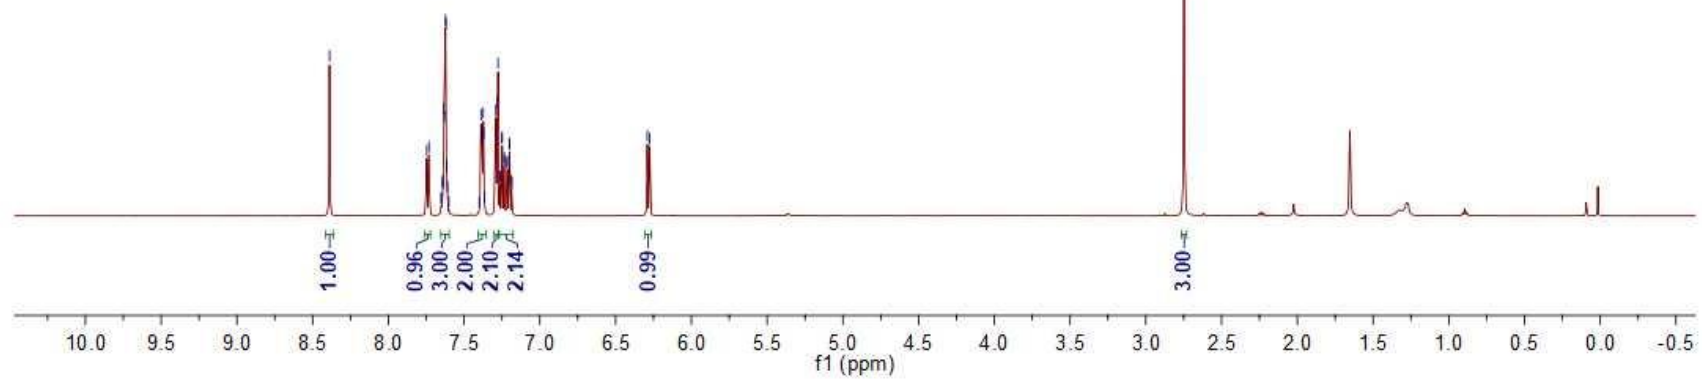

—2.748

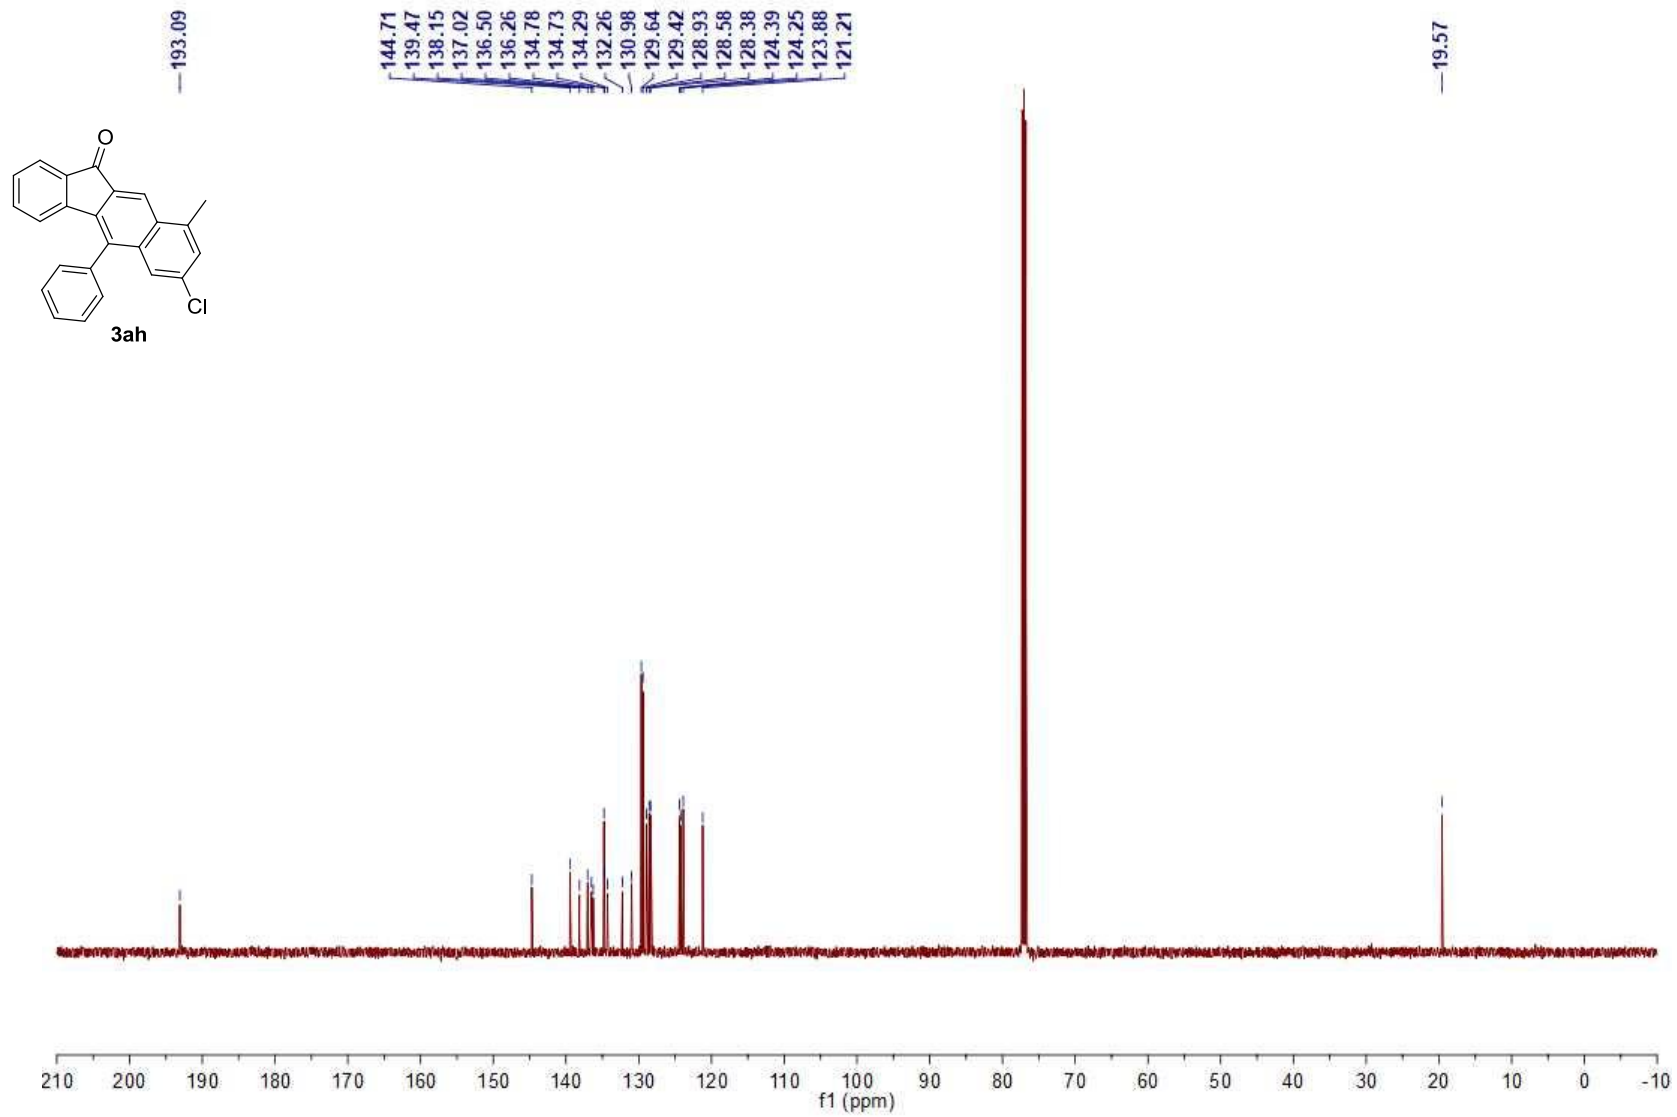

8.365  
8.361  
8.272  
8.212  
8.207  
8.081  
8.059  
7.767  
7.749  
7.674  
7.665  
7.658  
7.425  
7.417  
7.408  
7.402  
7.288  
7.272  
7.269  
7.260  
7.244  
7.241  
6.387  
6.368

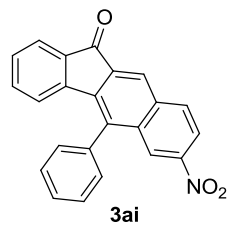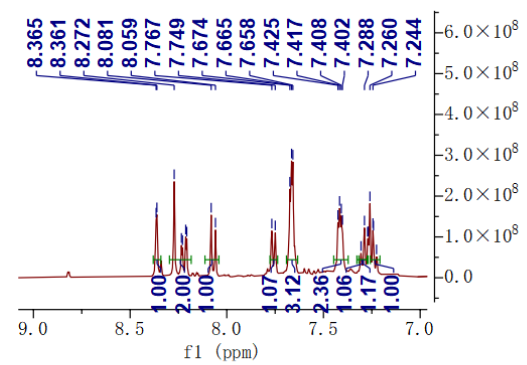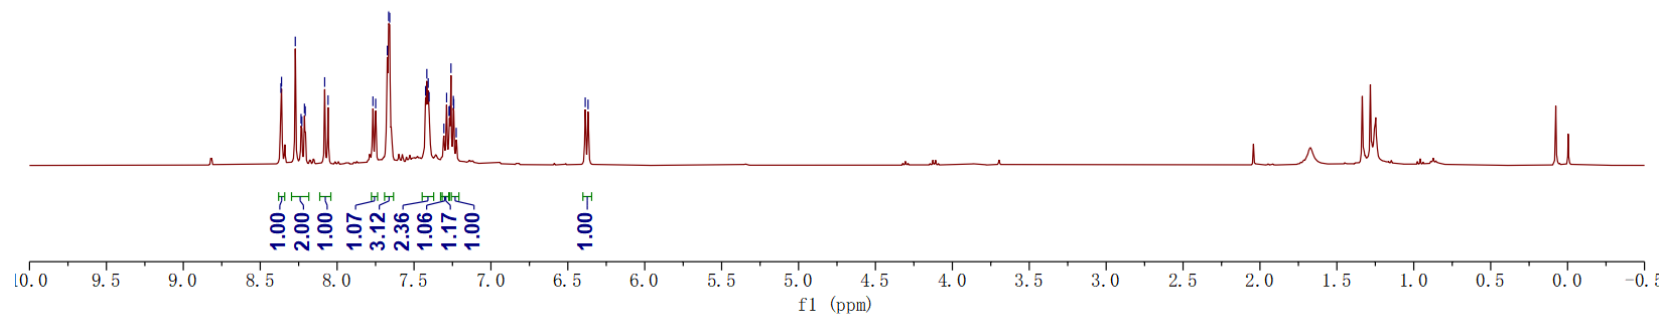



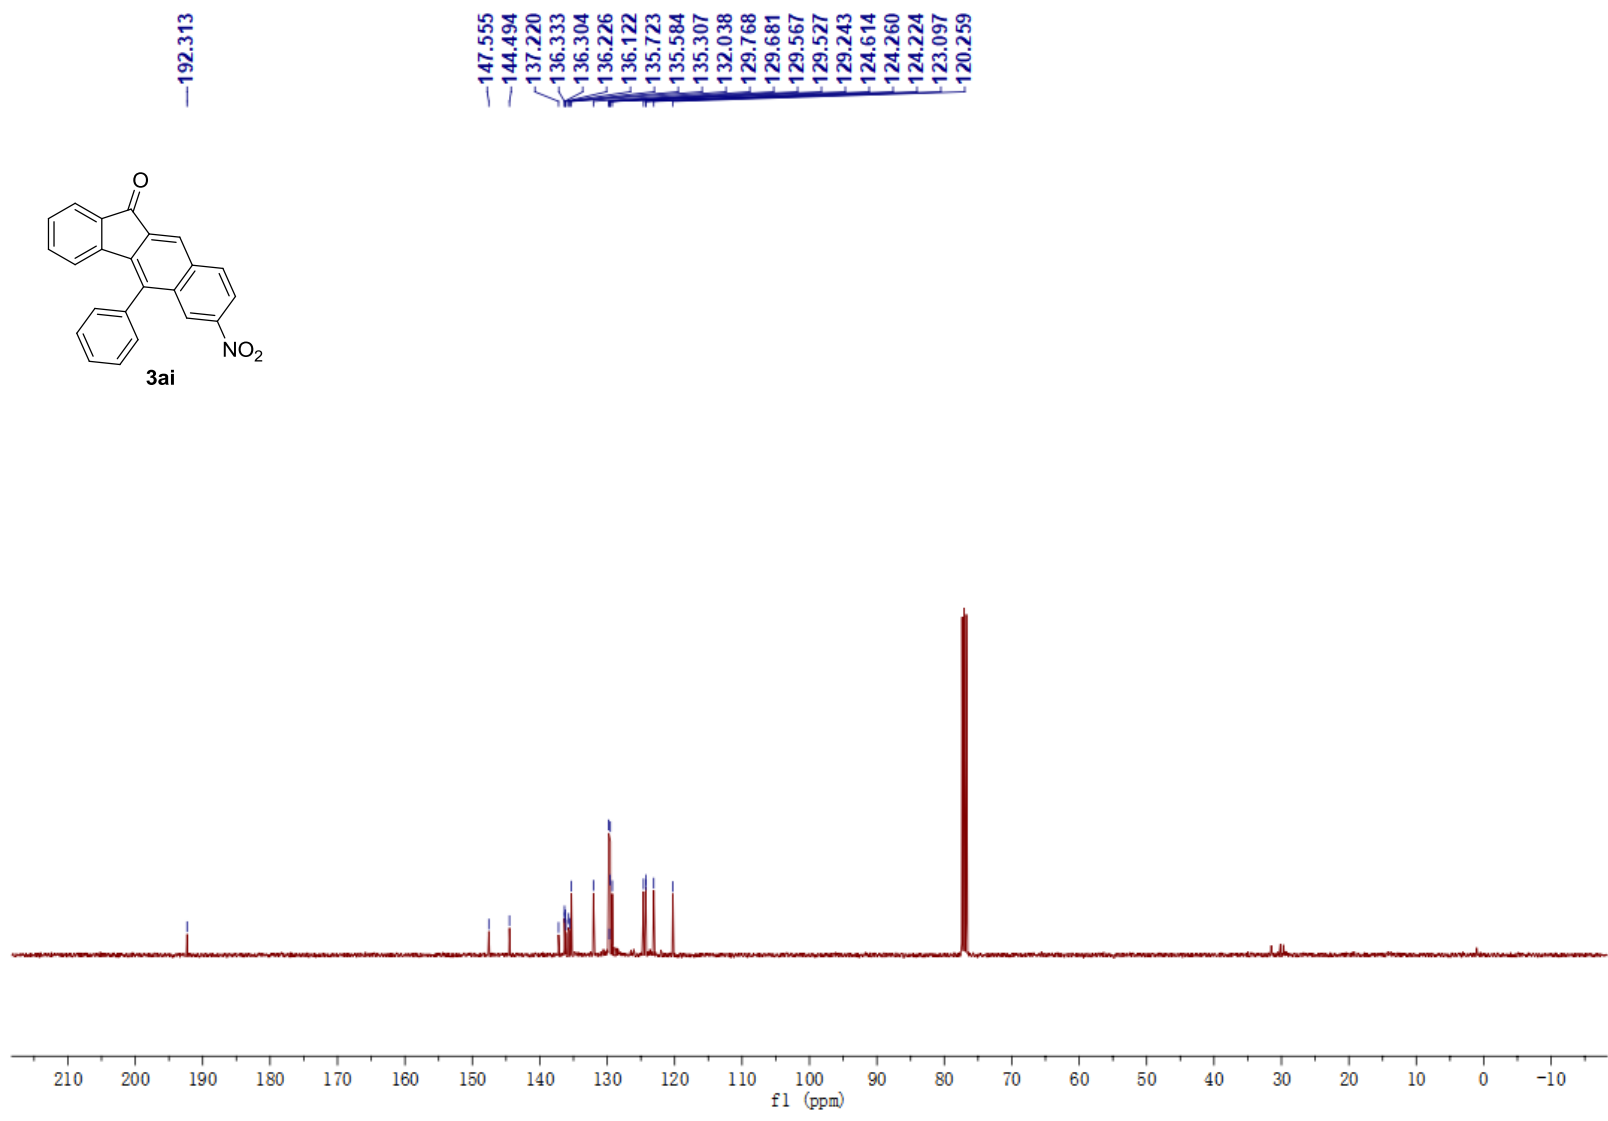

8.234  
8.030  
8.009  
7.810  
7.765  
7.746  
7.663  
7.654  
7.647  
7.629  
7.626  
7.608  
7.605  
7.393  
7.385  
7.381  
7.376  
7.370  
7.264  
7.260  
7.235  
7.232  
6.383  
6.365

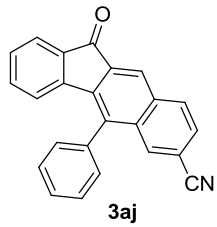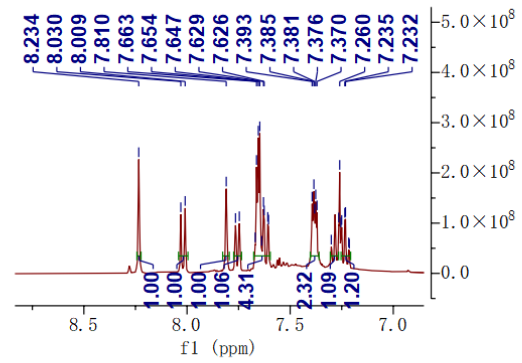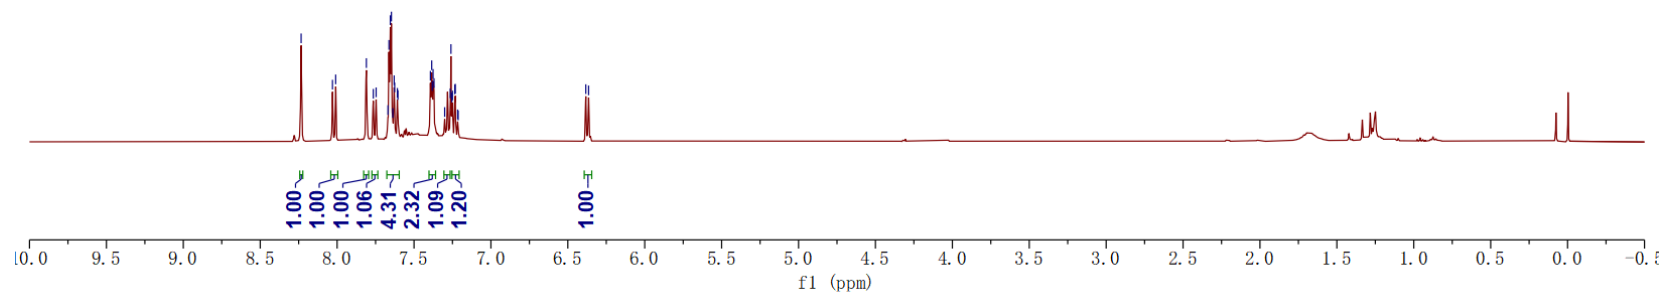

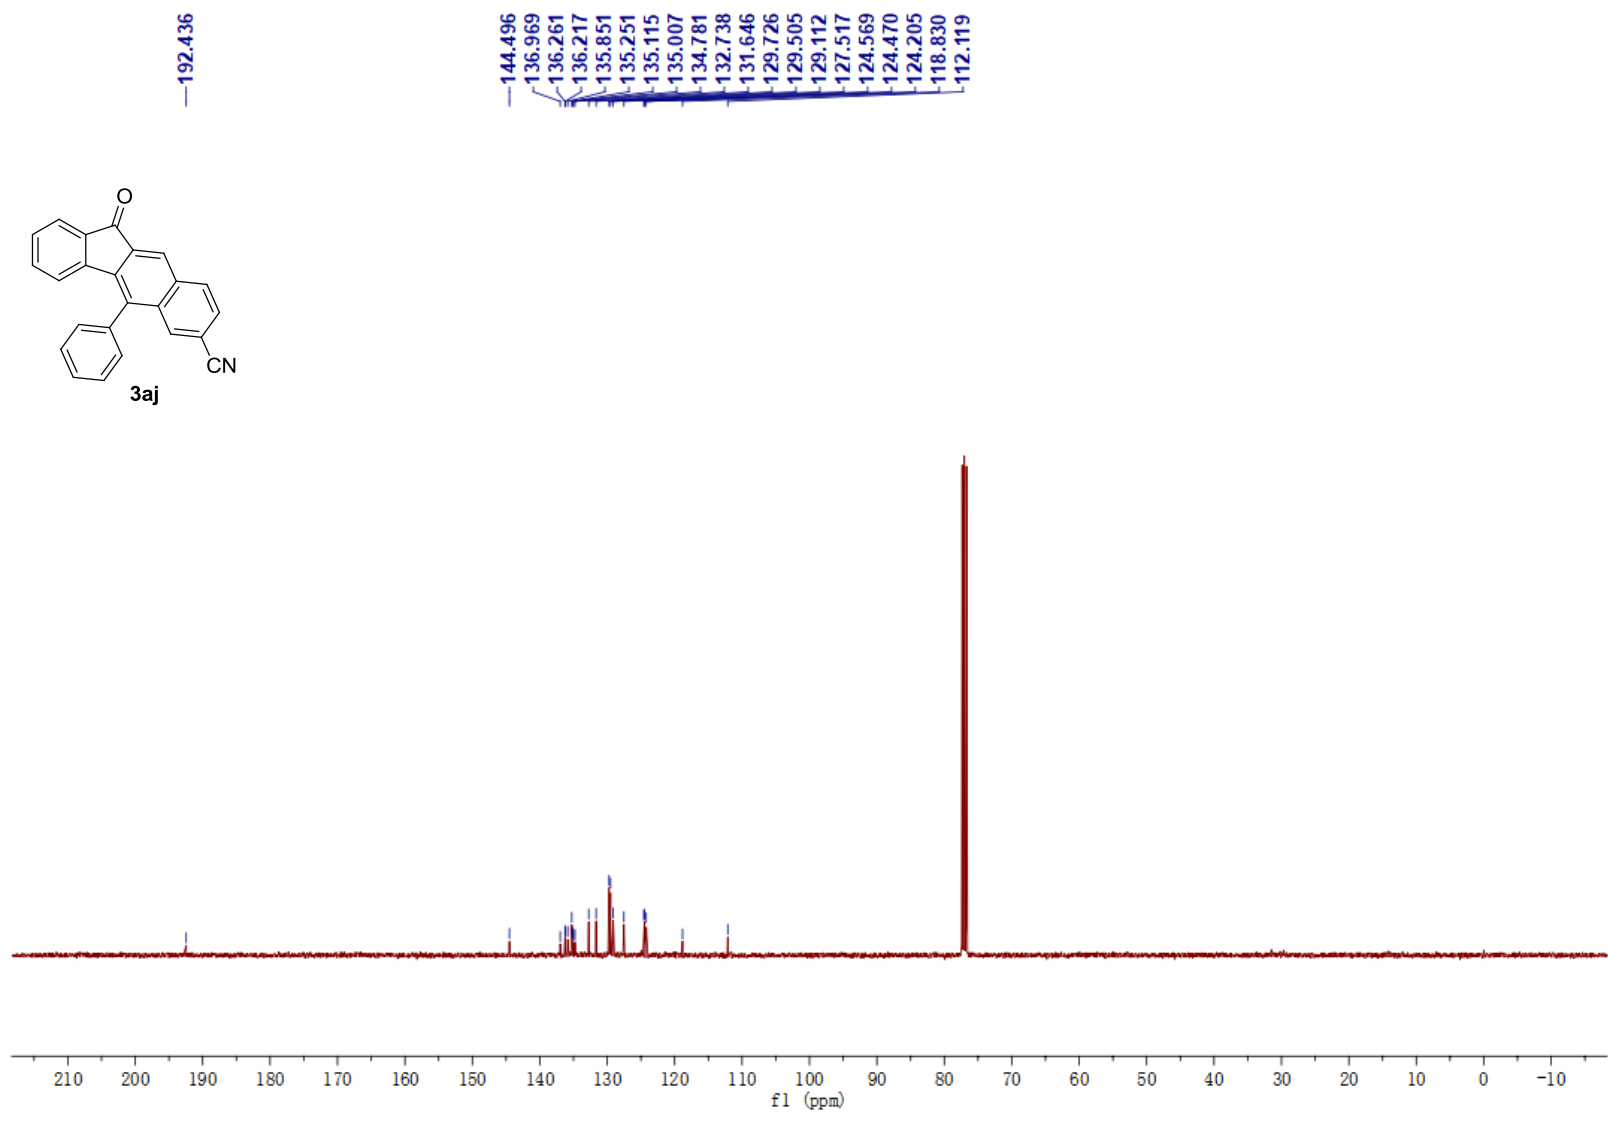

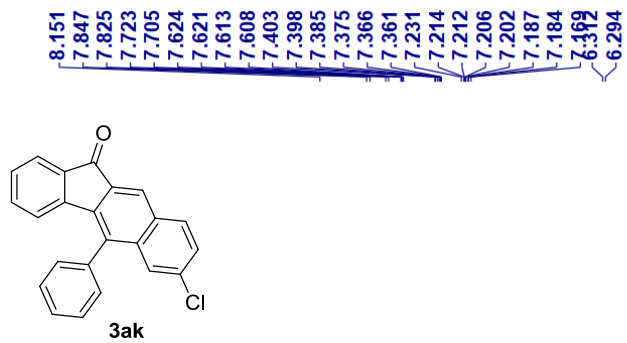

Chemical shift values (ppm) for the aromatic region:

- 8.151
- 7.847
- 7.825
- 7.723
- 7.705
- 7.624
- 7.613
- 7.608
- 7.403
- 7.398
- 7.385
- 7.375
- 7.366
- 7.361
- 7.231
- 7.214
- 7.212
- 7.206
- 7.202
- 7.187
- 7.184
- 6.312
- 6.294

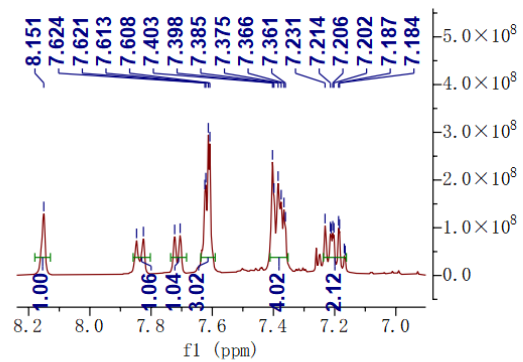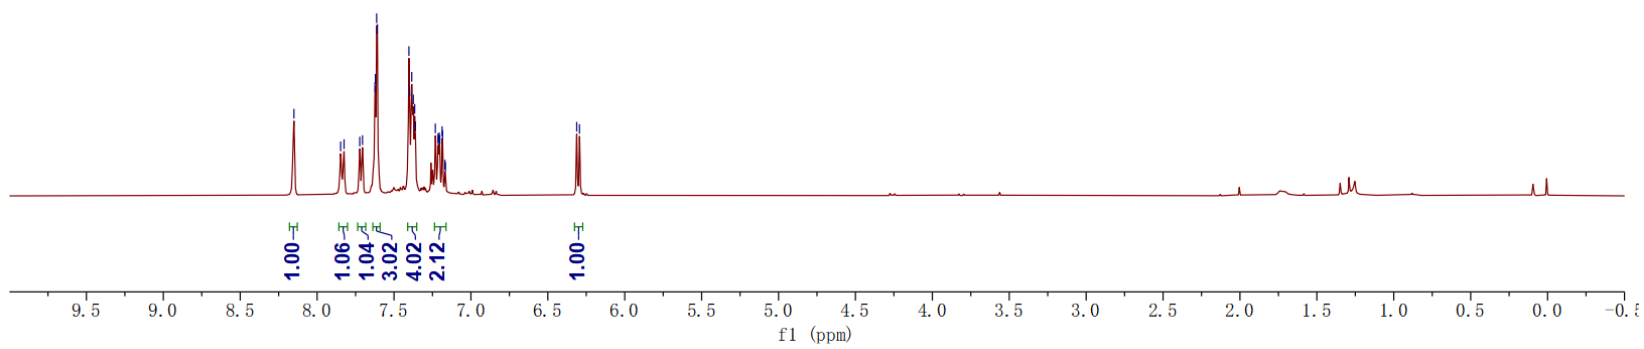

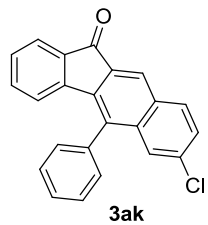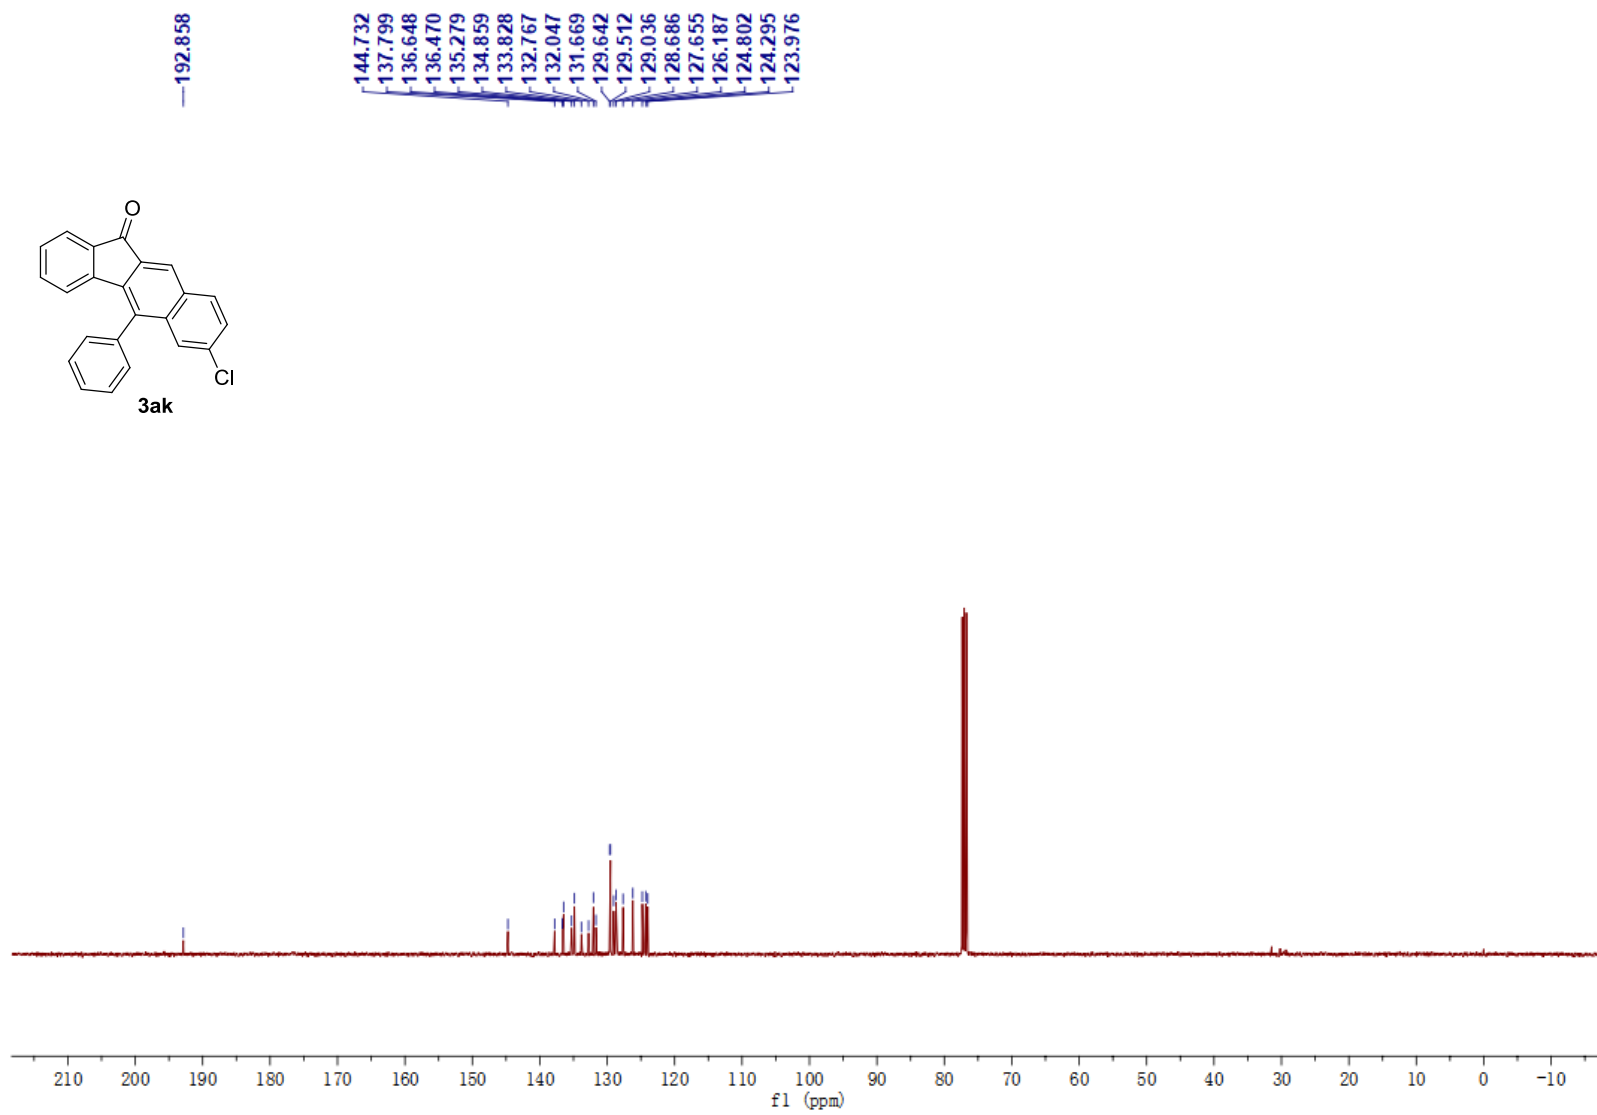

Supplement: d3ob01177a1.pdf [file d3ob01177a1.pdf]
